# Supplementary material for: Modeling Tracer Diffusion Coefficients of Any Type of Solutes in Polar and Non-Polar Dense Solvents
Source: MDPI journal article supplement (doi:10.3390/ma15186416), 2022-09-15
Supplement: s1 [file s1]

# Supplementary Material

## Modeling tracer diffusion coefficients of any type of solutes in polar and non-polar dense solvents

Bruno Zêzere, Inês Portugal, José R. B Gomes, Carlos M. Silva\*

CICECO – Aveiro Institute of Materials, Department of Chemistry, University of Aveiro, 3810-193 Aveiro, Portugal

\*Correspondence: carlos.manuel@ua.pt

|                                                                                                                                                                                                                                                                                                                                    |     |
|------------------------------------------------------------------------------------------------------------------------------------------------------------------------------------------------------------------------------------------------------------------------------------------------------------------------------------|-----|
| <b>Software</b> .....                                                                                                                                                                                                                                                                                                              | 2   |
| <b>Table S1.</b> Pure component data, compound name, chemical formula, CAS number, molecular weight, $M$ , critical temperature, $T_c$ , and volume, $V_c$ . .....                                                                                                                                                                 | 2   |
| <b>Table S2.</b> Polar solvents systems studied, number of data point (NDP), reduced number density range ( $\rho_{n,1}^*$ range), absolute temperature range ( $T$ range), binary interaction parameters ( $k_{12}$ and $B_{12}$ ), average absolute relative deviations (AARD) and source of the diffusion data. ...             | 1 2 |
| <b>Table S3.</b> Water solvent systems studied, number of data point (NDP), reduced number density range ( $\rho_{n,1}^*$ range), absolute temperature range ( $T$ range), binary interaction parameters ( $k_{12}$ and $B_{12}$ ), average absolute relative deviations (AARD) and source of the diffusion data. ...              | 1 7 |
| <b>Table S4.</b> Non-polar solvent systems studied, number of data point (NDP), reduced number density range ( $\rho_{n,1}^*$ range), absolute temperature range ( $T$ range), binary interaction parameters ( $k_{12}$ and $B_{12}$ ), average absolute relative deviations (AARD) and source of the diffusion data. ...          | 2 3 |
| <b>Table S5.</b> SC-CO <sub>2</sub> solvent systems studied, number of data point (NDP), reduced number density range ( $\rho_{n,1}^*$ range), absolute temperature range ( $T$ range), binary interaction parameters ( $k_{12}$ and $B_{12}$ ), average absolute relative deviations (AARD) and source of the diffusion data. ... | 30  |
| <b>References</b> .....                                                                                                                                                                                                                                                                                                            | 38  |

## Software

The model developed in this work is provided as a Matlab function. Download and usage instructions can be found in either of the following links:

- <https://www.egichem.com/tools/calculators/d12-rg/>
- [https://github.com/EgiChem/D12\\_Rice\\_Gray](https://github.com/EgiChem/D12_Rice_Gray)

**Table S1.** Pure component data, compound name, chemical formula, CAS number, molecular weight,  $M$ , critical temperature,  $T_c$ , and volume,  $V_c$ .

| Compound                                               | Formula                                                                                     | CAS number  | $M$<br>(g mol <sup>-1</sup> ) | $T_c$<br>(K)         | $V_c$<br>(cm <sup>3</sup> mol <sup>-1</sup> ) |
|--------------------------------------------------------|---------------------------------------------------------------------------------------------|-------------|-------------------------------|----------------------|-----------------------------------------------|
| [Bmim][BF <sub>4</sub> ]                               | C <sub>8</sub> H <sub>15</sub> N <sub>2</sub> BF <sub>4</sub>                               | 174501-65-6 | 226.02                        | 643.20 <sup>a</sup>  | 655.00 <sup>a</sup>                           |
| [Bmim][bti]                                            | C <sub>10</sub> H <sub>15</sub> N <sub>3</sub> F <sub>6</sub> S <sub>2</sub> O <sub>4</sub> | 174899-83-3 | 419.4                         | 1269.90 <sup>a</sup> | 990.10 <sup>a</sup>                           |
| [Bmim][CF <sub>3</sub> SO <sub>3</sub> ]               | C <sub>9</sub> H <sub>15</sub> N <sub>2</sub> F <sub>3</sub> SO <sub>3</sub>                | 174899-66-2 | 288.3                         | 1023.50 <sup>a</sup> | 750.70 <sup>a</sup>                           |
| [Bmim][Cl]                                             | C <sub>8</sub> H <sub>15</sub> N <sub>2</sub> Cl                                            | 79917-90-1  | 174.67                        | 789.00 <sup>a</sup>  | 568.80 <sup>a</sup>                           |
| [Bmim][MeSO <sub>4</sub> ]                             | C <sub>9</sub> H <sub>18</sub> N <sub>2</sub> SO <sub>4</sub>                               | 401788-98-5 | 250.32                        | 1081.60 <sup>a</sup> | 716.90 <sup>a</sup>                           |
| [Bmim][OCSO <sub>4</sub> ]                             | C <sub>16</sub> H <sub>32</sub> N <sub>2</sub> SO <sub>4</sub>                              | 445473-58-5 | 348.5                         | 1189.80 <sup>a</sup> | 1116.70 <sup>a</sup>                          |
| [Bmim][PF <sub>6</sub> ]                               | C <sub>8</sub> H <sub>15</sub> N <sub>2</sub> PF <sub>6</sub>                               | 174501-64-5 | 284.18                        | 719.40 <sup>a</sup>  | 762.50 <sup>a</sup>                           |
| [Emim][BF <sub>4</sub> ]                               | C <sub>6</sub> H <sub>11</sub> N <sub>2</sub> BF <sub>4</sub>                               | 143314-16-3 | 197.97                        | 596.20 <sup>a</sup>  | 540.80 <sup>a</sup>                           |
| [Emim][bti]                                            | C <sub>8</sub> H <sub>11</sub> N <sub>3</sub> F <sub>6</sub> S <sub>2</sub> O <sub>4</sub>  | 174899-82-2 | 391.31                        | 1249.30 <sup>a</sup> | 875.90 <sup>a</sup>                           |
| [Emim][C <sub>2</sub> H <sub>5</sub> SO <sub>4</sub> ] | C <sub>8</sub> H <sub>16</sub> N <sub>2</sub> SO <sub>4</sub>                               | 342573-75-5 | 236.3                         | 1067.50 <sup>a</sup> | 659.80 <sup>a</sup>                           |
| [Emim][C <sub>2</sub> N <sub>3</sub> ]                 | C <sub>8</sub> H <sub>11</sub> N <sub>5</sub>                                               | 370865-89-7 | 177.2                         | 999.00 <sup>a</sup>  | 597.80 <sup>a</sup>                           |
| [Emim][CF <sub>3</sub> SO <sub>3</sub> ]               | C <sub>7</sub> H <sub>11</sub> F <sub>3</sub> N <sub>2</sub> O <sub>3</sub> S               | 145022-44-2 | 260.2                         | 992.30 <sup>a</sup>  | 636.40 <sup>a</sup>                           |
| [Emim][MDEGSO <sub>4</sub> ]                           | C <sub>11</sub> H <sub>22</sub> N <sub>2</sub> SO <sub>6</sub>                              | 790663-77-3 | 310.4                         | 1162.90 <sup>a</sup> | 862.30 <sup>a</sup>                           |
| [Hmim][bti]                                            | C <sub>12</sub> H <sub>19</sub> N <sub>3</sub> F <sub>6</sub> S <sub>2</sub> O <sub>4</sub> | 382150-50-7 | 447.42                        | 1292.80 <sup>a</sup> | 1104.40 <sup>a</sup>                          |
| [Omim][bti]                                            | C <sub>14</sub> H <sub>23</sub> N <sub>3</sub> F <sub>6</sub> S <sub>2</sub> O <sub>4</sub> | 178631-04-4 | 475.5                         | 1317.80 <sup>a</sup> | 1218.60 <sup>a</sup>                          |
| acetamide                                              | C <sub>2</sub> H <sub>5</sub> NO                                                            | 60-35-5     | 59.07                         | 761.00 <sup>c</sup>  | 215.00 <sup>c</sup>                           |
| acetone                                                | C <sub>3</sub> H <sub>6</sub> O                                                             | 67-64-1     | 58.08                         | 508.10 <sup>d</sup>  | 209.00 <sup>d</sup>                           |
| acetonitrile                                           | C <sub>2</sub> H <sub>3</sub> N                                                             | 75-05-8     | 41.05                         | 545.50 <sup>d</sup>  | 173.00 <sup>d</sup>                           |
| acetylferrocene                                        | C <sub>12</sub> H <sub>12</sub> FeO                                                         | 1271-55-2   | 228.07                        | 847.00 <sup>e</sup>  | 569.20 <sup>f</sup>                           |
| acridine                                               | C <sub>13</sub> H <sub>9</sub> N                                                            | 260-94-6    | 179.22                        | 905.00 <sup>g</sup>  | 543.00 <sup>g</sup>                           |
| adamantanone                                           | C <sub>10</sub> H <sub>14</sub> O                                                           | 700-58-3    | 150.22                        | 759.15 <sup>f</sup>  | 368.22 <sup>f</sup>                           |
| alanine                                                | C <sub>3</sub> H <sub>7</sub> NO <sub>2</sub>                                               | 56-41-7     | 89.09                         | 698.48 <sup>h</sup>  | 205.50 <sup>h</sup>                           |
| alloisoleucine                                         | C <sub>6</sub> H <sub>13</sub> NO <sub>2</sub>                                              | 1509-34-8   | 131.17                        | 762.89 <sup>h</sup>  | 411.00 <sup>h</sup>                           |
| allothreonine                                          | C <sub>4</sub> H <sub>9</sub> NO <sub>3</sub>                                               | 24830-94-2  | 119.12                        | 827.59 <sup>h</sup>  | 316.90 <sup>h</sup>                           |
| allylbenzene                                           | C <sub>9</sub> H <sub>10</sub>                                                              | 300-57-2    | 118.18                        | 639.86 <sup>i</sup>  | 419.80 <sup>i</sup>                           |
| aluminum acetylacetonate                               | Al(C <sub>5</sub> H <sub>7</sub> O <sub>2</sub> ) <sub>3</sub>                              | 13963-57-0  | 324.31                        | 437.66 <sup>f</sup>  | 881.69 <sup>f</sup>                           |
| $\alpha$ -amino- <i>n</i> -butyric acid                | C <sub>4</sub> H <sub>9</sub> NO <sub>2</sub>                                               | 2835-81-6   | 103.12                        | 719.32 <sup>h</sup>  | 306.90 <sup>h</sup>                           |
| ammonia                                                | NH <sub>3</sub>                                                                             | 7664-41-7   | 17.03                         | 405.50 <sup>d</sup>  | 72.50 <sup>d</sup>                            |
| aniline                                                | C <sub>6</sub> H <sub>7</sub> N                                                             | 62-53-3     | 93.13                         | 699.00 <sup>d</sup>  | 274.00 <sup>d</sup>                           |
| anisole                                                | C <sub>7</sub> H <sub>8</sub> O                                                             | 100-66-3    | 108.14                        | 641.65 <sup>c</sup>  | 337.00 <sup>c</sup>                           |
| anthracene                                             | C <sub>14</sub> H <sub>10</sub>                                                             | 120-12-7    | 178.23                        | 873.00 <sup>c</sup>  | 554.00 <sup>c</sup>                           |

| Compound                                                   | Formula                                                      | CAS number | $M$<br>(g mol <sup>-1</sup> ) | $T_c$<br>(K)         | $V_c$<br>(cm <sup>3</sup> mol <sup>-1</sup> ) |
|------------------------------------------------------------|--------------------------------------------------------------|------------|-------------------------------|----------------------|-----------------------------------------------|
| arabinose                                                  | C <sub>5</sub> H <sub>10</sub> O <sub>5</sub>                | 147-81-9   | 150.13                        | 1021.42 <sup>h</sup> | 370.95 <sup>h</sup>                           |
| arachidonic acid (AA)                                      | C <sub>20</sub> H <sub>32</sub> O <sub>2</sub>               | 506-32-1   | 304.47                        | 1013.42 <sup>h</sup> | 1093.20 <sup>h</sup>                          |
| AA ethyl ester                                             | C <sub>22</sub> H <sub>36</sub> O <sub>2</sub>               | 1808-26-0  | 332.53                        | 960.63 <sup>b</sup>  | 1195.26 <sup>b</sup>                          |
| argon                                                      | Ar                                                           | 7440-37-1  | 39.95                         | 150.80 <sup>d</sup>  | 74.90 <sup>d</sup>                            |
| astaxanthin                                                | C <sub>40</sub> H <sub>52</sub> O <sub>4</sub>               | 472-61-7   | 596.84                        | 1148.51 <sup>i</sup> | 1877.50 <sup>i</sup>                          |
| behenic acid ethyl ester                                   | C <sub>24</sub> H <sub>48</sub> O <sub>2</sub>               | 5908-87-2  | 368.64                        | 984.94 <sup>b</sup>  | 1394.66 <sup>b</sup>                          |
| benzene                                                    | C <sub>6</sub> H <sub>6</sub>                                | 71-43-2    | 78.11                         | 562.20 <sup>d</sup>  | 259.00 <sup>d</sup>                           |
| benzoic acid                                               | C <sub>7</sub> H <sub>6</sub> O <sub>2</sub>                 | 65-85-0    | 122.12                        | 752.00 <sup>d</sup>  | 341.00 <sup>d</sup>                           |
| benzonitrile                                               | C <sub>7</sub> H <sub>5</sub> N                              | 100-47-0   | 103.12                        | 699.35 <sup>c</sup>  | 339.00 <sup>c</sup>                           |
| benzothiophene                                             | C <sub>8</sub> H <sub>6</sub> S                              | 95-15-8    | 134.2                         | 764.00 <sup>k</sup>  | 379.00 <sup>k</sup>                           |
| benzyl acetate                                             | C <sub>9</sub> H <sub>10</sub> O <sub>2</sub>                | 140-11-4   | 150.18                        | 699.00 <sup>c</sup>  | 449.00 <sup>c</sup>                           |
| benzylacetone                                              | C <sub>10</sub> H <sub>12</sub> O                            | 2550-26-7  | 148.2                         | 722.51 <sup>i</sup>  | 500.50 <sup>i</sup>                           |
| biphenyl                                                   | C <sub>12</sub> H <sub>10</sub>                              | 92-52-4    | 154.21                        | 789.00 <sup>d</sup>  | 502.00 <sup>d</sup>                           |
| 2-bromoanisole                                             | C <sub>7</sub> H <sub>7</sub> BrO                            | 578-57-4   | 187.04                        | 737.58 <sup>i</sup>  | 378.05 <sup>i</sup>                           |
| bromobenzene                                               | C <sub>6</sub> H <sub>5</sub> Br                             | 108-86-1   | 157.01                        | 670.00 <sup>d</sup>  | 324.00 <sup>d</sup>                           |
| <i>n</i> -butane                                           | C <sub>4</sub> H <sub>10</sub>                               | 106-97-8   | 58.12                         | 425.20 <sup>d</sup>  | 255.00 <sup>d</sup>                           |
| 1,2-butanediol                                             | C <sub>4</sub> H <sub>10</sub> O <sub>2</sub>                | 584-03-2   | 90.12                         | 622.14 <sup>c</sup>  | 291.50 <sup>c</sup>                           |
| 1,3-butanediol                                             | C <sub>4</sub> H <sub>10</sub> O <sub>2</sub>                | 107-88-0   | 90.12                         | 643.00 <sup>c</sup>  | 292.00 <sup>c</sup>                           |
| 1,4-butanediol                                             | C <sub>4</sub> H <sub>10</sub> O <sub>2</sub>                | 111-63-4   | 90.12                         | 667.00 <sup>c</sup>  | 297.00 <sup>c</sup>                           |
| 1-butanol                                                  | C <sub>4</sub> H <sub>10</sub> O                             | 71-36-3    | 74.12                         | 563.10 <sup>d</sup>  | 275.00 <sup>d</sup>                           |
| 2-methyl-1-butanol                                         | C <sub>5</sub> H <sub>12</sub> O                             | 137-32-6   | 88.15                         | 565.00 <sup>c</sup>  | 327.00 <sup>c</sup>                           |
| 2-methyl-2-butanol                                         | C <sub>5</sub> H <sub>12</sub> O                             | 75-85-4    | 88.15                         | 545.15 <sup>c</sup>  | 327.00 <sup>c</sup>                           |
| 3-methyl-1-butanol                                         | C <sub>5</sub> H <sub>12</sub> O                             | 123-51-3   | 88.15                         | 579.45 <sup>c</sup>  | 327.00 <sup>c</sup>                           |
| 3-methyl-2-butanol                                         | C <sub>5</sub> H <sub>12</sub> O                             | 598-75-4   | 88.15                         | 574.00 <sup>c</sup>  | 327.00 <sup>c</sup>                           |
| <i>n</i> -butanol                                          | C <sub>4</sub> H <sub>10</sub> O                             | 71-36-3    | 74.12                         | 563.10 <sup>d</sup>  | 275.00 <sup>d</sup>                           |
| 2-butanone                                                 | C <sub>4</sub> H <sub>8</sub> O                              | 78-93-3    | 72.11                         | 536.80 <sup>d</sup>  | 267.00 <sup>d</sup>                           |
| <i>N</i> -(4-methoxybenzylidene)-4- <i>n</i> -butylaniline | C <sub>18</sub> H <sub>21</sub> NO                           | 26227-73-6 | 267.37                        | 962.06 <sup>f</sup>  | 592.93 <sup>f</sup>                           |
| <i>n</i> -butylbenzene                                     | C <sub>10</sub> H <sub>14</sub>                              | 104-51-8   | 134.22                        | 660.50 <sup>d</sup>  | 497.00 <sup>d</sup>                           |
| <i>sec</i> -butylbenzene                                   | C <sub>10</sub> H <sub>14</sub>                              | 135-98-8   | 134.22                        | 672.06 <sup>l</sup>  | 478.37 <sup>l</sup>                           |
| <i>tert</i> -butylbenzene                                  | C <sub>10</sub> H <sub>14</sub>                              | 98-06-6    | 134.22                        | 660.00 <sup>d</sup>  | 492.00 <sup>c</sup>                           |
| ethyl ester                                                | C <sub>6</sub> H <sub>12</sub> O <sub>2</sub>                | 105-54-4   | 116.2                         | 579.00 <sup>m</sup>  | 400.00 <sup>m</sup>                           |
| caffeine                                                   | C <sub>8</sub> H <sub>10</sub> N <sub>4</sub> O <sub>2</sub> | 58-08-2    | 194.2                         | 855.60 <sup>m</sup>  | 488.00 <sup>m</sup>                           |
| camphor                                                    | C <sub>15</sub> H <sub>24</sub> O                            | 76-22-2    | 152.24                        | 709.00 <sup>c</sup>  | 460.00 <sup>c</sup>                           |
| capric acid ethyl ester                                    | C <sub>12</sub> H <sub>24</sub> O <sub>2</sub>               | 110-38-3   | 200                           | 699.30 <sup>m</sup>  | 733.50 <sup>m</sup>                           |
| caprylic acid ethyl ester                                  | C <sub>10</sub> H <sub>20</sub> O <sub>2</sub>               | 106-32-1   | 172.3                         | 655.70 <sup>m</sup>  | 621.50 <sup>m</sup>                           |
| carbon dioxide                                             | CO <sub>2</sub>                                              | 124-38-9   | 44.01                         | 304.10 <sup>d</sup>  | 93.90 <sup>d</sup>                            |
| carbon disulfide                                           | CS <sub>2</sub>                                              | 75-15-0    | 76.13                         | 552.00 <sup>d</sup>  | 160.00 <sup>d</sup>                           |
| carbon monoxide                                            | CO                                                           | 630-08-0   | 28.01                         | 132.90 <sup>d</sup>  | 93.20 <sup>d</sup>                            |
| carbon tetrabromide                                        | CBr <sub>4</sub>                                             | 558-13-4   | 331.63                        | 724.91 <sup>c</sup>  | 328.50 <sup>c</sup>                           |

| Compound                            | Formula                                                        | CAS number | $M$<br>(g mol <sup>-1</sup> ) | $T_c$<br>(K)         | $V_c$<br>(cm <sup>3</sup> mol <sup>-1</sup> ) |
|-------------------------------------|----------------------------------------------------------------|------------|-------------------------------|----------------------|-----------------------------------------------|
| carbon tetrachloride                | CCl <sub>4</sub>                                               | 56-23-5    | 153.82                        | 556.40 <sup>d</sup>  | 275.90 <sup>d</sup>                           |
| β-carotene                          | C <sub>40</sub> H <sub>56</sub>                                | 7235-40-7  | 536.88                        | 1450.76 <sup>h</sup> | 1934.95 <sup>h</sup>                          |
| L-carvone                           | C <sub>10</sub> H <sub>14</sub> O                              | 6485-40-1  | 150.22                        | 709.40 <sup>n</sup>  | 504.65 <sup>n</sup>                           |
| chlorobenzene                       | C <sub>6</sub> H <sub>5</sub> Cl                               | 108-90-7   | 112.56                        | 632.40 <sup>d</sup>  | 308.00 <sup>d</sup>                           |
| <i>p</i> -chloronitrobenzene        | C <sub>6</sub> H <sub>4</sub> ClNO <sub>2</sub>                | 100-00-5   | 157.56                        | 751.00 <sup>c</sup>  | 432.00 <sup>c</sup>                           |
| chlorotrifluoromethane              | CClF <sub>3</sub>                                              | 75-72-9    | 104.46                        | 302.00 <sup>d</sup>  | 180.40 <sup>d</sup>                           |
| chromium(III) acetylacetonate       | Cr(acac) <sub>3</sub>                                          | 21679-31-2 | 349.32                        | 858.85 <sup>f</sup>  | 627.04 <sup>f</sup>                           |
| chrysene                            | C <sub>18</sub> H <sub>12</sub>                                | 218-01-9   | 228.29                        | 979.00 <sup>c</sup>  | 690.00 <sup>c</sup>                           |
| cinnamic acid                       | C <sub>9</sub> H <sub>8</sub> O <sub>2</sub>                   | 140-10-3   | 148.161                       | 797.00 <sup>g</sup>  | 446.00 <sup>g</sup>                           |
| citral                              | C <sub>10</sub> H <sub>16</sub> O                              | 5392-40-5  | 152.24                        | 692.70 <sup>h</sup>  | 591.00 <sup>h</sup>                           |
| cobalt(III) acetylacetonate         | C <sub>15</sub> H <sub>21</sub> CoO <sub>6</sub>               | 21679-46-9 | 356.26                        | 573.48 <sup>f</sup>  | 640.95 <sup>f</sup>                           |
| copper(II) trifluoroacetylacetonate | C <sub>10</sub> H <sub>8</sub> CuF <sub>6</sub> O <sub>4</sub> | 14324-82-4 | 369.7                         | 412.85 <sup>f</sup>  | 441.13 <sup>f</sup>                           |
| 12-crown-4                          | C <sub>8</sub> H <sub>16</sub> O <sub>4</sub>                  | 294-93-9   | 176.21                        | 780.66 <sup>h</sup>  | 444.75 <sup>h</sup>                           |
| 15-crown-5                          | C <sub>10</sub> H <sub>20</sub> O <sub>5</sub>                 | 33100-27-5 | 220.27                        | 876.80 <sup>h</sup>  | 548.75 <sup>h</sup>                           |
| 18-crown-6                          | C <sub>12</sub> H <sub>24</sub> O <sub>6</sub>                 | 17455-13-9 | 264.32                        | 970.51 <sup>h</sup>  | 652.75 <sup>h</sup>                           |
| dicyclohexano-18-crown-6            | C <sub>20</sub> H <sub>36</sub> O <sub>6</sub>                 | 16069-36-6 | 372.5                         | 1177.47 <sup>h</sup> | 1002.75 <sup>h</sup>                          |
| dicyclohexano-24-crown-8            | C <sub>24</sub> H <sub>44</sub> O <sub>8</sub>                 | 17455-23-1 | 460.61                        | 1357.66 <sup>h</sup> | 1210.75 <sup>h</sup>                          |
| dibenzo-24-crown-8                  | C <sub>24</sub> H <sub>32</sub> O <sub>8</sub>                 | 14174-09-5 | 448.51                        | 1396.77 <sup>h</sup> | 1174.35 <sup>h</sup>                          |
| α-cyclodextrin                      | C <sub>36</sub> H <sub>60</sub> O <sub>30</sub>                | 10016-20-3 | 972.84                        | 2580.29 <sup>f</sup> | 1794.01 <sup>f</sup>                          |
| β-cyclodextrin                      | C <sub>42</sub> H <sub>70</sub> O <sub>35</sub>                | 7585-39-9  | 1134.98                       | 2790.00 <sup>f</sup> | 2089.68 <sup>f</sup>                          |
| cycloheptanone                      | C <sub>7</sub> H <sub>12</sub> O                               | 502-42-1   | 112.17                        | 671.19 <sup>f</sup>  | 297.87 <sup>f</sup>                           |
| cyclohexane                         | C <sub>6</sub> H <sub>12</sub>                                 | 110-82-7   | 84.16                         | 553.50 <sup>d</sup>  | 308.00 <sup>d</sup>                           |
| cyclononanone                       | C <sub>9</sub> H <sub>16</sub> O                               | 3350-30-9  | 140.22                        | 702.10 <sup>f</sup>  | 380.74 <sup>f</sup>                           |
| cyclopentane                        | C <sub>5</sub> H <sub>10</sub>                                 | 287-92-3   | 70.14                         | 511.70 <sup>d</sup>  | 260.00 <sup>d</sup>                           |
| cyclopentanone                      | C <sub>5</sub> H <sub>8</sub> O                                | 120-92-3   | 84.12                         | 626.00 <sup>c</sup>  | 258.00 <sup>c</sup>                           |
| <i>n</i> -decane                    | C <sub>10</sub> H <sub>22</sub>                                | 124-18-5   | 142.29                        | 617.70 <sup>d</sup>  | 603.00 <sup>d</sup>                           |
| deuterium oxide                     | D <sub>2</sub> O                                               | 7789-20-0  | 20.03                         | 643.89 <sup>d</sup>  | 56.26 <sup>d</sup>                            |
| dibenzothiophene                    | C <sub>12</sub> H <sub>8</sub> S                               | 132-65-0   | 184.26                        | 897.00 <sup>k</sup>  | 512.00 <sup>k</sup>                           |
| dibenzyl ether                      | C <sub>14</sub> H <sub>14</sub> O                              | 103-50-4   | 198.26                        | 777.00 <sup>c</sup>  | 608.00 <sup>c</sup>                           |
| 1,3-dibromobenzene                  | C <sub>6</sub> H <sub>4</sub> Br <sub>2</sub>                  | 108-36-1   | 235.91                        | 761.00 <sup>c</sup>  | 372.00 <sup>c</sup>                           |
| 1,2-dichlorobenzene                 | C <sub>6</sub> H <sub>4</sub> Cl <sub>2</sub>                  | 95-50-1    | 147                           | 729.00 <sup>d</sup>  | 360.00 <sup>d</sup>                           |
| 1,3-dichlorobenzene                 | C <sub>6</sub> H <sub>4</sub> Cl <sub>2</sub>                  | 541-73-1   | 147                           | 683.95 <sup>c</sup>  | 351.00 <sup>c</sup>                           |
| <i>p</i> -dichlorobenzene           | C <sub>6</sub> H <sub>4</sub> Cl <sub>2</sub>                  | 106-46-7   | 147                           | 684.75 <sup>c</sup>  | 351.00 <sup>c</sup>                           |
| diethanolamine                      | C <sub>4</sub> H <sub>11</sub> NO <sub>2</sub>                 | 111-42-2   | 105.14                        | 736.60 <sup>k</sup>  | 349.00 <sup>k</sup>                           |
| diethyl ether                       | C <sub>4</sub> H <sub>10</sub> O                               | 60-29-7    | 74.12                         | 466.70 <sup>d</sup>  | 280.00 <sup>d</sup>                           |
| 1,2-diethylbenzene                  | C <sub>10</sub> H <sub>14</sub>                                | 135-01-3   | 134.22                        | 668.00 <sup>c</sup>  | 502.00 <sup>c</sup>                           |
| 1,4-diethylbenzene                  | C <sub>10</sub> H <sub>14</sub>                                | 105-05-5   | 134.22                        | 657.96 <sup>c</sup>  | 497.00 <sup>c</sup>                           |
| diethylene glycol                   | C <sub>4</sub> H <sub>10</sub> O <sub>3</sub>                  | 111-46-6   | 106.12                        | 744.60 <sup>c</sup>  | 312.00 <sup>c</sup>                           |
| <i>N,N</i> -diethylethanolamine     | C <sub>6</sub> H <sub>15</sub> NO                              | 100-37-8   | 117.19                        | 592.00 <sup>g</sup>  | 401.00 <sup>g</sup>                           |

| Compound                    | Formula                                                       | CAS number | $M$<br>(g mol <sup>-1</sup> ) | $T_c$<br>(K)         | $V_c$<br>(cm <sup>3</sup> mol <sup>-1</sup> ) |
|-----------------------------|---------------------------------------------------------------|------------|-------------------------------|----------------------|-----------------------------------------------|
| <i>o</i> -difluorobenzene   | C <sub>6</sub> H <sub>4</sub> F <sub>2</sub>                  | 367-11-3   | 114.09                        | 554.46 <sup>c</sup>  | 299.50 <sup>c</sup>                           |
| <i>p</i> -difluorobenzene   | C <sub>6</sub> H <sub>4</sub> F <sub>2</sub>                  | 540-36-3   | 114.09                        | 556.00 <sup>c</sup>  | 299.50 <sup>c</sup>                           |
| diglycolamine               | C <sub>4</sub> H <sub>11</sub> NO <sub>2</sub>                | 929-06-6   | 105.14                        | 699.00 <sup>c</sup>  | 330.00 <sup>c</sup>                           |
| diisopropanolamine          | C <sub>6</sub> H <sub>15</sub> NO <sub>2</sub>                | 110-97-4   | 133.19                        | 672.00 <sup>k</sup>  | 454.00 <sup>k</sup>                           |
| diisopropyl ether           | C <sub>6</sub> H <sub>14</sub> O                              | 108-20-3   | 102.18                        | 500.30 <sup>d</sup>  | 386.00 <sup>d</sup>                           |
| 2,4-dimethyl-3-pentanone    | C <sub>7</sub> H <sub>14</sub> O                              | 565-80-0   | 114.19                        | 576.00 <sup>g</sup>  | 416.00 <sup>g</sup>                           |
| 2,3-dimethylaniline         | C <sub>8</sub> H <sub>11</sub> N                              | 87-59-2    | 121.18                        | 717.00 <sup>i</sup>  | 400.38 <sup>i</sup>                           |
| 2,6-dimethylaniline         | C <sub>8</sub> H <sub>11</sub> N                              | 87-62-7    | 121.18                        | 722.00 <sup>o</sup>  | 400.38 <sup>i</sup>                           |
| 9,10-dimethylanthracene     | C <sub>16</sub> H <sub>14</sub>                               | 781-43-1   | 206.29                        | 899.22 <sup>h</sup>  | 724.55 <sup>h</sup>                           |
| 2,3-dimethylbutane          | C <sub>6</sub> H <sub>14</sub>                                | 79-29-8    | 86.18                         | 500.00 <sup>d</sup>  | 358.00 <sup>d</sup>                           |
| 1,1'-dimethylferrocene      | C <sub>12</sub> H <sub>14</sub> Fe                            | 1291-47-0  | 214.09                        | 514.45 <sup>f</sup>  | 400.64 <sup>f</sup>                           |
| 2,3-dimethylnaphthalene     | C <sub>12</sub> H <sub>12</sub>                               | 581-40-8   | 156.23                        | 777.78 <sup>c</sup>  | 521.50 <sup>c</sup>                           |
| 2,6-dimethylnaphthalene     | C <sub>12</sub> H <sub>12</sub>                               | 581-42-0   | 156.23                        | 777.00 <sup>c</sup>  | 520.00 <sup>c</sup>                           |
| 2,7-dimethylnaphthalene     | C <sub>12</sub> H <sub>12</sub>                               | 582-16-1   | 156.23                        | 778.00 <sup>c</sup>  | 520.00 <sup>c</sup>                           |
| 2,4-dimethylphenol          | C <sub>8</sub> H <sub>10</sub> O                              | 105-67-9   | 122.17                        | 707.60 <sup>d</sup>  | 390.00 <sup>c</sup>                           |
| diolein                     | C <sub>39</sub> H <sub>72</sub> O <sub>5</sub>                | 2465-32-9  | 621.99                        | 1025.00 <sup>g</sup> | 2150.00 <sup>g</sup>                          |
| dipropylene glycol          | C <sub>6</sub> H <sub>14</sub> O <sub>3</sub>                 | 25265-71-8 | 134.18                        | 654.00 <sup>c</sup>  | 415.00 <sup>c</sup>                           |
| disperse blue 14            | C <sub>16</sub> H <sub>14</sub> N <sub>2</sub> O <sub>2</sub> | 2475-44-7  | 266                           | 1137.33 <sup>i</sup> | 765.50 <sup>j</sup>                           |
| disperse orange 11          | C <sub>15</sub> H <sub>11</sub> NO <sub>2</sub>               | 82-28-0    | 237.25                        | 1103.62 <sup>j</sup> | 670.00 <sup>j</sup>                           |
| 1,3-divinylbenzene          | C <sub>10</sub> H <sub>10</sub>                               | 108-57-6   | 130.19                        | 692.00 <sup>c</sup>  | 440.00 <sup>c</sup>                           |
| dimethylethanolamine (DMEA) | C <sub>4</sub> H <sub>11</sub> NO                             | 108-01-0   | 89.14                         | 571.82 <sup>c</sup>  | 300.00 <sup>c</sup>                           |
| docosahexaenoic acid (DHA)  | C <sub>22</sub> H <sub>32</sub> O <sub>2</sub>                | 6217-54-5  | 328.49                        | 833.67 <sup>h</sup>  | 1164.30 <sup>h</sup>                          |
| DHA ethyl ester             | C <sub>24</sub> H <sub>36</sub> O <sub>2</sub>                | 84494-72-4 | 356.55                        | 828.45 <sup>h</sup>  | 1276.40 <sup>h</sup>                          |
| DHA methyl ester            | C <sub>23</sub> H <sub>34</sub> O <sub>2</sub>                | 2566-90-7  | 342.52                        | 844.78 <sup>h</sup>  | 1220.85 <sup>h</sup>                          |
| <i>n</i> -dodecane          | C <sub>12</sub> H <sub>26</sub>                               | 112-40-3   | 170.34                        | 658.20 <sup>d</sup>  | 713.00 <sup>d</sup>                           |
| <i>n</i> -eicosane          | C <sub>20</sub> H <sub>42</sub>                               | 112-95-8   | 282.56                        | 767.00 <sup>d</sup>  | 1190.00 <sup>c</sup>                          |
| eicosapentaenoic acid (EPA) | C <sub>20</sub> H <sub>30</sub> O <sub>2</sub>                | 10417-94-4 | 302.46                        | 1020.90 <sup>b</sup> | 1059.15 <sup>b</sup>                          |
| EPA ethyl ester             | C <sub>22</sub> H <sub>34</sub> O <sub>2</sub>                | 84494-70-2 | 330.51                        | 968.16 <sup>b</sup>  | 1173.16 <sup>b</sup>                          |
| EPA methyl ester            | C <sub>21</sub> H <sub>32</sub> O <sub>2</sub>                | 2734-47-6  | 316.48                        | 890.55 <sup>b</sup>  | 1187.03 <sup>b</sup>                          |
| meso-erythritol             | C <sub>4</sub> H <sub>10</sub> O <sub>4</sub>                 | 149-32-6   | 122.12                        | 940.29 <sup>h</sup>  | 313.95 <sup>h</sup>                           |
| ethane                      | C <sub>2</sub> H <sub>6</sub>                                 | 74-84-0    | 30.07                         | 305.40 <sup>d</sup>  | 148.30 <sup>d</sup>                           |
| ethanol                     | C <sub>2</sub> H <sub>6</sub> O                               | 64-17-5    | 46.07                         | 513.90 <sup>d</sup>  | 167.10 <sup>d</sup>                           |
| ethyl acetate               | C <sub>4</sub> H <sub>8</sub> O <sub>2</sub>                  | 141-78-6   | 88.11                         | 523.30 <sup>g</sup>  | 286.00 <sup>g</sup>                           |
| ethyl benzoate              | C <sub>9</sub> H <sub>10</sub> O <sub>2</sub>                 | 93-89-0    | 150.18                        | 668.70 <sup>d</sup>  | 489.00 <sup>c</sup>                           |
| ethylbenzene                | C <sub>8</sub> H <sub>10</sub>                                | 100-41-4   | 106.17                        | 617.20 <sup>d</sup>  | 374.00 <sup>d</sup>                           |
| ethylene                    | C <sub>2</sub> H <sub>4</sub>                                 | 74-85-1    | 28.05                         | 282.40 <sup>d</sup>  | 130.40 <sup>d</sup>                           |
| ethylene glycol             | C <sub>2</sub> H <sub>6</sub> O <sub>2</sub>                  | 107-21-1   | 62.07                         | 645.00 <sup>c</sup>  | 191.00 <sup>c</sup>                           |
| ethylferrocene              | C <sub>12</sub> H <sub>14</sub> Fe                            | 1273-89-8  | 214.08                        | 554.21 <sup>f</sup>  | 400.64 <sup>f</sup>                           |
| 1-ethylnaphthalene          | C <sub>12</sub> H <sub>12</sub>                               | 1127-76-0  | 156.23                        | 776.00 <sup>c</sup>  | 520.00 <sup>c</sup>                           |

| Compound                            | Formula                                                     | CAS number | $M$<br>(g mol <sup>-1</sup> ) | $T_c$<br>(K)         | $V_c$<br>(cm <sup>3</sup> mol <sup>-1</sup> ) |
|-------------------------------------|-------------------------------------------------------------|------------|-------------------------------|----------------------|-----------------------------------------------|
| 2-ethyltoluene                      | C <sub>9</sub> H <sub>12</sub>                              | 611-14-3   | 120.19                        | 651.00 <sup>d</sup>  | 460.00 <sup>d</sup>                           |
| 3-ethyltoluene                      | C <sub>9</sub> H <sub>12</sub>                              | 620-14-4   | 120.19                        | 637.00 <sup>d</sup>  | 490.00 <sup>d</sup>                           |
| 4-ethyltoluene                      | C <sub>9</sub> H <sub>12</sub>                              | 622-96-8   | 120.19                        | 640.00 <sup>d</sup>  | 470.00 <sup>d</sup>                           |
| eucalyptol                          | C <sub>10</sub> H <sub>18</sub> O                           | 470-82-6   | 154.25                        | 695.50 <sup>p</sup>  | 509.50 <sup>p</sup>                           |
| eugenol                             | C <sub>10</sub> H <sub>12</sub> O <sub>2</sub>              | 97-53-0    | 164.2                         | 735.31 <sup>i</sup>  | 447.23 <sup>i</sup>                           |
| ferrocene                           | C <sub>10</sub> H <sub>10</sub> Fe                          | 102-54-5   | 186.04                        | 786.27 <sup>f</sup>  | 317.77 <sup>f</sup>                           |
| 2-fluoroanisole                     | C <sub>7</sub> H <sub>7</sub> FO                            | 321-28-8   | 126.13                        | 644.81 <sup>i</sup>  | 328.87 <sup>i</sup>                           |
| fluorobenzene                       | C <sub>6</sub> H <sub>5</sub> F                             | 462-06-6   | 96.1                          | 560.10 <sup>d</sup>  | 269.00 <sup>d</sup>                           |
| 3-fluorophenol                      | C <sub>6</sub> H <sub>5</sub> FO                            | 372-20-3   | 112.1                         | 665.54 <sup>h</sup>  | 339.60 <sup>h</sup>                           |
| formamide                           | CH <sub>3</sub> NO                                          | 75-12-7    | 45.04                         | 771.00 <sup>c</sup>  | 163.00 <sup>c</sup>                           |
| fructose                            | C <sub>6</sub> H <sub>12</sub> O <sub>6</sub>               | 57-48-7    | 180.16                        | 1242.06 <sup>f</sup> | 357.45 <sup>f</sup>                           |
| 5-(hydroxymethyl) furfural          | C <sub>6</sub> H <sub>6</sub> O <sub>3</sub>                | 67-47-0    | 126.11                        | 737.30 <sup>k</sup>  | 343.00 <sup>k</sup>                           |
| furfural                            | C <sub>5</sub> H <sub>4</sub> O <sub>2</sub>                | 98-01-1    | 96.08                         | 670.15 <sup>k</sup>  | 252.00 <sup>k</sup>                           |
| galactose                           | C <sub>6</sub> H <sub>12</sub> O <sub>6</sub>               | 59-23-4    | 180.16                        | 1059.54 <sup>k</sup> | 459.00 <sup>k</sup>                           |
| gallic acid                         | C <sub>7</sub> H <sub>6</sub> O <sub>5</sub>                | 149-91-7   | 170.12                        | 1136.70 <sup>q</sup> | 276.20 <sup>q</sup>                           |
| geraniol                            | C <sub>10</sub> H <sub>18</sub> O                           | 106-24-1   | 154.25                        | 688.44 <sup>h</sup>  | 571.30 <sup>h</sup>                           |
| glucose                             | C <sub>6</sub> H <sub>12</sub> O <sub>6</sub>               | 50-99-7    | 180.16                        | 755.00 <sup>g</sup>  | 414.00 <sup>g</sup>                           |
| glycerol                            | C <sub>3</sub> H <sub>8</sub> O <sub>3</sub>                | 56-81-5    | 92.09                         | 723.00 <sup>c</sup>  | 264.00 <sup>c</sup>                           |
| glycine                             | C <sub>2</sub> H <sub>5</sub> NO <sub>2</sub>               | 56-40-6    | 75.07                         | 1021.00 <sup>r</sup> | 234.00 <sup>r</sup>                           |
| guaiacol                            | C <sub>7</sub> H <sub>8</sub> O <sub>2</sub>                | 90-05-1    | 124.14                        | 697.00 <sup>k</sup>  | 353.00 <sup>k</sup>                           |
| <i>n</i> -heptane                   | C <sub>7</sub> H <sub>16</sub>                              | 142-82-5   | 100.2                         | 540.30 <sup>d</sup>  | 432.00 <sup>d</sup>                           |
| 2-heptanone                         | C <sub>7</sub> H <sub>14</sub> O                            | 110-43-0   | 114.19                        | 611.50 <sup>d</sup>  | 421.00 <sup>c</sup>                           |
| 4-heptanone                         | C <sub>7</sub> H <sub>14</sub> O                            | 123-19-3   | 114.19                        | 595.31 <sup>c</sup>  | 433.50 <sup>c</sup>                           |
| hexachlorobenzene                   | C <sub>6</sub> Cl <sub>6</sub>                              | 118-74-1   | 284.78                        | 825.00 <sup>c</sup>  | 526.00 <sup>c</sup>                           |
| <i>n</i> -hexadecane                | C <sub>16</sub> H <sub>34</sub>                             | 544-76-3   | 226.45                        | 722.00 <sup>d</sup>  | 930.00 <sup>d</sup>                           |
| 1-hexadecene                        | C <sub>16</sub> H <sub>32</sub>                             | 629-73-2   | 224.43                        | 722.00 <sup>k</sup>  | 933.00 <sup>k</sup>                           |
| 1,1,1,5,5,5-hexafluoroacetylacetone | C <sub>5</sub> H <sub>2</sub> F <sub>6</sub> O <sub>2</sub> | 1552-22-1  | 208.06                        | 569.07 <sup>b</sup>  | 406.05 <sup>b</sup>                           |
| hexafluorobenzene                   | C <sub>6</sub> F <sub>6</sub>                               | 392-56-3   | 186.06                        | 516.70 <sup>d</sup>  | 335.00 <sup>d</sup>                           |
| <i>n</i> -hexane                    | C <sub>6</sub> H <sub>14</sub>                              | 110-54-3   | 86.18                         | 507.50 <sup>d</sup>  | 370.00 <sup>d</sup>                           |
| 1,2,6-hexanetriol                   | C <sub>6</sub> H <sub>14</sub> O <sub>3</sub>               | 106-69-4   | 134.18                        | 844.91 <sup>h</sup>  | 415.05 <sup>h</sup>                           |
| homoserine                          | C <sub>4</sub> H <sub>9</sub> NO <sub>3</sub>               | 672-15-1   | 119.12                        | 823.94 <sup>h</sup>  | 323.90 <sup>h</sup>                           |
| hydrogen                            | H <sub>2</sub>                                              | 1333-74-0  | 2.02                          | 33.00 <sup>d</sup>   | 64.30 <sup>d</sup>                            |
| hydrogen sulfide                    | H <sub>2</sub> S                                            | 04/06/7783 | 34.08                         | 373.20 <sup>d</sup>  | 98.60 <sup>d</sup>                            |
| Ibuprofen                           | C <sub>13</sub> H <sub>18</sub> O <sub>2</sub>              | 15687-27-1 | 206.29                        | 769.63 <sup>h</sup>  | 686.35 <sup>h</sup>                           |
| indole                              | C <sub>8</sub> H <sub>7</sub> N                             | 204-420-7  | 117.15                        | 790.00 <sup>t</sup>  | 431.00 <sup>t</sup>                           |
| <i>myo</i> -inositol                | C <sub>6</sub> H <sub>12</sub> O <sub>6</sub>               | 87-89-8    | 180.16                        | 850.00 <sup>g</sup>  | 412.00 <sup>g</sup>                           |
| iodobenzene                         | C <sub>6</sub> H <sub>5</sub> I                             | 591-50-4   | 204.01                        | 721.00 <sup>d</sup>  | 351.00 <sup>d</sup>                           |
| isobutylbenzene                     | C <sub>10</sub> H <sub>14</sub>                             | 538-93-2   | 134.22                        | 650.00 <sup>l</sup>  | 480.00 <sup>l</sup>                           |
| isobutyramide                       | C <sub>4</sub> H <sub>9</sub> NO                            | 127-19-5   | 87.12                         | 658.00 <sup>g</sup>  | 321.00 <sup>g</sup>                           |

| Compound                              | Formula                                         | CAS number | $M$<br>(g mol <sup>-1</sup> ) | $T_c$<br>(K)         | $V_c$<br>(cm <sup>3</sup> mol <sup>-1</sup> ) |
|---------------------------------------|-------------------------------------------------|------------|-------------------------------|----------------------|-----------------------------------------------|
| isoleucine                            | C <sub>6</sub> H <sub>13</sub> NO <sub>2</sub>  | 73-32-5    | 131.17                        | 761.52 <sup>h</sup>  | 412.50 <sup>h</sup>                           |
| krypton                               | Kr                                              | 7439-90-9  | 83.8                          | 209.40 <sup>d</sup>  | 91.20 <sup>d</sup>                            |
| lactose                               | C <sub>12</sub> H <sub>22</sub> O <sub>11</sub> | 63-42-3    | 342.3                         | 1431.89 <sup>f</sup> | 653.12 <sup>f</sup>                           |
| leucine                               | C <sub>6</sub> H <sub>13</sub> O <sub>2</sub> N | 61-90-5    | 131.17                        | 761.52 <sup>h</sup>  | 412.50 <sup>h</sup>                           |
| <i>tert</i> -leucine                  | C <sub>6</sub> H <sub>13</sub> NO <sub>2</sub>  | 20859-02-3 | 131.17                        | 766.89 <sup>h</sup>  | 404.00 <sup>h</sup>                           |
| D-limonene                            | C <sub>10</sub> H <sub>16</sub>                 | 5989-27-5  | 136.24                        | 660.00 <sup>c</sup>  | 524.00 <sup>c</sup>                           |
| linalool                              | C <sub>10</sub> H <sub>18</sub> O               | 78-70-6    | 154.25                        | 645.80 <sup>h</sup>  | 558.00 <sup>h</sup>                           |
| linoleic acid                         | C <sub>18</sub> H <sub>32</sub> O <sub>2</sub>  | 60-33-3    | 280.45                        | 775.00 <sup>g</sup>  | 990.00 <sup>g</sup>                           |
| linoleic acid methyl ester            | C <sub>19</sub> H <sub>34</sub> O <sub>2</sub>  | 112-63-0   | 294.48                        | 870.78 <sup>b</sup>  | 1070.95 <sup>b</sup>                          |
| $\alpha$ -Linolenic acid              | C <sub>18</sub> H <sub>30</sub> O <sub>2</sub>  | 463-40-1   | 278.44                        | 780.00 <sup>g</sup>  | 1070.00 <sup>g</sup>                          |
| $\gamma$ -linolenic acid              | C <sub>18</sub> H <sub>30</sub> O <sub>2</sub>  | 506-26-3   | 278.44                        | 958.98 <sup>b</sup>  | 992.35 <sup>b</sup>                           |
| $\gamma$ -linolenic acid ethyl ester  | C <sub>20</sub> H <sub>34</sub> O <sub>2</sub>  | 31450-14-3 | 306.48                        | 937.01 <sup>f</sup>  | 797.37 <sup>f</sup>                           |
| $\gamma$ -linolenic acid methyl ester | C <sub>19</sub> H <sub>32</sub> O <sub>2</sub>  | 16326-32-2 | 292.46                        | 882.79 <sup>b</sup>  | 1050.86 <sup>b</sup>                          |
| mannitol                              | C <sub>6</sub> H <sub>14</sub> O <sub>6</sub>   | 69-65-8    | 182.17                        | 1246.06 <sup>h</sup> | 445.05 <sup>h</sup>                           |
| mannose                               | C <sub>6</sub> H <sub>12</sub> O <sub>6</sub>   | 3458-28-4  | 180.16                        | 1059.54 <sup>k</sup> | 459.00 <sup>k</sup>                           |
| monoethanolamine (MEA)                | C <sub>2</sub> H <sub>7</sub> NO                | 141-43-5   | 61.08                         | 638.00 <sup>c</sup>  | 225.00 <sup>c</sup>                           |
| L-menthone                            | C <sub>10</sub> H <sub>18</sub> O               | 14073-97-3 | 154.25                        | 699.44 <sup>n</sup>  | 525.24 <sup>n</sup>                           |
| methane                               | CH <sub>4</sub>                                 | 74-82-8    | 16.04                         | 190.40 <sup>d</sup>  | 99.20 <sup>d</sup>                            |
| methanol                              | CH <sub>4</sub> O                               | 67-56-1    | 32.04                         | 512.60 <sup>d</sup>  | 118.00 <sup>d</sup>                           |
| methyl bromide                        | CH <sub>3</sub> Br                              | 74-83-9    | 94.94                         | 467.00 <sup>c</sup>  | 156.00 <sup>c</sup>                           |
| methyl chloride                       | CH <sub>3</sub> Cl                              | 74-87-3    | 50.49                         | 416.30 <sup>d</sup>  | 138.90 <sup>d</sup>                           |
| methyl fluoride                       | CH <sub>3</sub> F                               | 593-53-3   | 34.03                         | 315.00 <sup>d</sup>  | 113.20 <sup>d</sup>                           |
| 2-methylanisole                       | C <sub>8</sub> H <sub>10</sub> O                | 578-58-5   | 122.17                        | 648.79 <sup>i</sup>  | 371.70 <sup>i</sup>                           |
| 4-methylanisole                       | C <sub>8</sub> H <sub>10</sub> O                | 104-93-8   | 122.17                        | 655.36 <sup>i</sup>  | 371.70 <sup>i</sup>                           |
| 3-methylbutylbenzene                  | C <sub>11</sub> H <sub>15</sub>                 | 2049-94-7  | 148.25                        | 672.06 <sup>l</sup>  | 542.47 <sup>l</sup>                           |
| methylcyclopentane                    | C <sub>6</sub> H <sub>12</sub>                  | 96-37-7    | 84.16                         | 532.70 <sup>d</sup>  | 319.00 <sup>d</sup>                           |
| <i>n</i> -methyldiethanolamine        | C <sub>5</sub> H <sub>13</sub> NO <sub>2</sub>  | 105-59-9   | 119.16                        | 675.00 <sup>k</sup>  | 368.00 <sup>k</sup>                           |
| 1-methylnaphthalene                   | C <sub>11</sub> H <sub>10</sub>                 | 90-12-0    | 142.2                         | 772.00 <sup>k</sup>  | 465.00 <sup>k</sup>                           |
| <i>N</i> -methylpyrrolidone           | C <sub>5</sub> H <sub>9</sub> NO                | 872-50-4   | 99.13                         | 724.00 <sup>c</sup>  | 316.00 <sup>c</sup>                           |
| monoisopropanolamine (MIPA)           | C <sub>3</sub> H <sub>9</sub> NO                | 78-96-6    | 75.11                         | 614.00 <sup>c</sup>  | 278.00 <sup>c</sup>                           |
| monoolein                             | C <sub>21</sub> H <sub>40</sub> O <sub>4</sub>  | 111-03-5   | 356.55                        | 885.00 <sup>g</sup>  | 1210.00 <sup>g</sup>                          |
| myristic acid ethyl ester             | C <sub>16</sub> H <sub>32</sub> O <sub>2</sub>  | 124-06-1   | 256.43                        | 789.35 <sup>b</sup>  | 950.66 <sup>b</sup>                           |
| myristoleic acid                      | C <sub>14</sub> H <sub>26</sub> O <sub>2</sub>  | 544-64-9   | 226.36                        | 854.23 <sup>h</sup>  | 819.90 <sup>h</sup>                           |
| myristoleic acid methyl ester         | C <sub>15</sub> H <sub>28</sub> O <sub>2</sub>  | 56219-06-8 | 240.39                        | 777.79 <sup>h</sup>  | 876.45 <sup>h</sup>                           |
| naphthalene                           | C <sub>10</sub> H <sub>8</sub>                  | 91-20-3    | 128.17                        | 748.40 <sup>d</sup>  | 413.00 <sup>d</sup>                           |
| 1-naphthol                            | C <sub>10</sub> H <sub>8</sub> O                | 90-15-3    | 144.17                        | 802.00 <sup>c</sup>  | 375.50 <sup>c</sup>                           |
| 2-naphthol                            | C <sub>10</sub> H <sub>8</sub> O                | 135-19-3   | 144.17                        | 811.40 <sup>m</sup>  | 375.50 <sup>m</sup>                           |
| neon                                  | Ne                                              | 09/01/7440 | 20.18                         | 44.40 <sup>d</sup>   | 41.60 <sup>d</sup>                            |
| nickel(II) acetylacetonate            | Ni(acac) <sub>2</sub>                           | 3264-82-2  | 256.91                        | 654.02 <sup>f</sup>  | 431.20 <sup>f</sup>                           |

| Compound                      | Formula                                                       | CAS number | $M$<br>(g mol <sup>-1</sup> ) | $T_c$<br>(K)        | $V_c$<br>(cm <sup>3</sup> mol <sup>-1</sup> ) |
|-------------------------------|---------------------------------------------------------------|------------|-------------------------------|---------------------|-----------------------------------------------|
| 2-nitroanisole                | C <sub>7</sub> H <sub>7</sub> NO <sub>3</sub>                 | 91-23-6    | 153.14                        | 782.00 <sup>c</sup> | 422.00 <sup>c</sup>                           |
| nitrobenzene                  | C <sub>6</sub> H <sub>5</sub> NO <sub>2</sub>                 | 98-95-3    | 123.11                        | 719.00 <sup>c</sup> | 349.00 <sup>c</sup>                           |
| nitrogen                      | N <sub>2</sub>                                                | 7727-37-9  | 28.01                         | 126.20 <sup>d</sup> | 89.80 <sup>d</sup>                            |
| 3-nitrotoluene                | C <sub>7</sub> H <sub>7</sub> NO <sub>2</sub>                 | 99-08-1    | 137.14                        | 734.00 <sup>c</sup> | 441.00 <sup>c</sup>                           |
| nitrous oxide                 | N <sub>2</sub> O                                              | 10024-97-2 | 44.01                         | 309.60 <sup>d</sup> | 97.40 <sup>d</sup>                            |
| <i>n</i> -nonane              | C <sub>9</sub> H <sub>20</sub>                                | 111-84-2   | 128.26                        | 594.60 <sup>d</sup> | 548.00 <sup>d</sup>                           |
| 2-nonanone                    | C <sub>9</sub> H <sub>18</sub> O                              | 821-55-6   | 142.24                        | 644.29 <sup>c</sup> | 545.50 <sup>c</sup>                           |
| 5-nonanone                    | C <sub>9</sub> H <sub>18</sub> O                              | 502-56-7   | 142.24                        | 640.00 <sup>g</sup> | 560.00 <sup>g</sup>                           |
| norleucine                    | C <sub>6</sub> H <sub>13</sub> NO <sub>2</sub>                | 327-57-1   | 131.17                        | 757.63 <sup>h</sup> | 418.50 <sup>h</sup>                           |
| norvaline                     | C <sub>5</sub> H <sub>11</sub> NO <sub>2</sub>                | 09/12/2013 | 117.15                        | 737.84 <sup>h</sup> | 362.50 <sup>h</sup>                           |
| octafluorotoluene             | C <sub>7</sub> F <sub>8</sub>                                 | 434-64-0   | 236.06                        | 534.47 <sup>o</sup> | 428.00 <sup>o</sup>                           |
| <i>n</i> -octane              | C <sub>8</sub> H <sub>18</sub>                                | 111-65-9   | 114.23                        | 568.80 <sup>d</sup> | 492.00 <sup>d</sup>                           |
| 1-octene                      | C <sub>8</sub> H <sub>16</sub>                                | 111-66-0   | 112.22                        | 566.70 <sup>d</sup> | 464.00 <sup>d</sup>                           |
| oleic acid                    | C <sub>18</sub> H <sub>34</sub> O <sub>2</sub>                | 112-80-1   | 282.47                        | 781.00 <sup>g</sup> | 1000.00 <sup>g</sup>                          |
| oleic acid ethyl ester        | C <sub>20</sub> H <sub>38</sub> O <sub>2</sub>                | 111-62-6   | 310.52                        | 891.97 <sup>h</sup> | 1154.20 <sup>h</sup>                          |
| oleic acid methyl ester       | C <sub>19</sub> H <sub>36</sub> O <sub>2</sub>                | 112-62-9   | 296.49                        | 868.65 <sup>h</sup> | 1098.65 <sup>h</sup>                          |
| oxygen                        | O <sub>2</sub>                                                | 7782-44-7  | 32                            | 154.60 <sup>d</sup> | 73.40 <sup>d</sup>                            |
| palladium(II) acetylacetonate | C <sub>10</sub> H <sub>14</sub> O <sub>4</sub> Pd             | 14024-61-4 | 304.64                        | 651.12 <sup>f</sup> | 435.41 <sup>f</sup>                           |
| palmitic acid ethyl ester     | C <sub>18</sub> H <sub>36</sub> O <sub>2</sub>                | 628-97-7   | 284.48                        | 835.62 <sup>b</sup> | 1061.66 <sup>b</sup>                          |
| pentaerythritol               | C <sub>5</sub> H <sub>12</sub> O <sub>4</sub>                 | 115-77-5   | 136.15                        | 780.00 <sup>c</sup> | 381.00 <sup>c</sup>                           |
| pentafluorobenzene            | C <sub>6</sub> HF <sub>5</sub>                                | 363-72-4   | 168.07                        | 530.97 <sup>o</sup> | 324.00 <sup>o</sup>                           |
| <i>n</i> -pentane             | C <sub>5</sub> H <sub>12</sub>                                | 109-66-0   | 72.15                         | 469.70 <sup>d</sup> | 304.00 <sup>d</sup>                           |
| 2-methyl-2,4-pentanediol      | C <sub>6</sub> H <sub>14</sub> O <sub>2</sub>                 | 107-41-5   | 118.18                        | 621.00 <sup>g</sup> | 398.00 <sup>g</sup>                           |
| 1-pentanol                    | C <sub>5</sub> H <sub>12</sub> O                              | 71-41-0    | 88.15                         | 588.20 <sup>d</sup> | 326.00 <sup>d</sup>                           |
| 2-pentanol                    | C <sub>5</sub> H <sub>12</sub> O                              | 6032-29-7  | 88.15                         | 552.00 <sup>c</sup> | 327.00 <sup>c</sup>                           |
| 3-pentanol                    | C <sub>5</sub> H <sub>12</sub> O                              | 584-02-1   | 88.15                         | 547.00 <sup>c</sup> | 327.00 <sup>c</sup>                           |
| 2-pentanone                   | C <sub>5</sub> H <sub>10</sub> O                              | 107-87-9   | 86.13                         | 561.10 <sup>d</sup> | 301.00 <sup>d</sup>                           |
| 3-pentanone                   | C <sub>5</sub> H <sub>10</sub> O                              | 96-22-0    | 86.13                         | 561.00 <sup>d</sup> | 336.00 <sup>d</sup>                           |
| <i>n</i> -pentylbenzene       | C <sub>11</sub> H <sub>16</sub>                               | 538-68-1   | 148.25                        | 679.90 <sup>c</sup> | 550.00 <sup>c</sup>                           |
| phenanthrene                  | C <sub>14</sub> H <sub>10</sub>                               | 85-01-8    | 178.23                        | 873.00 <sup>d</sup> | 554.00 <sup>d</sup>                           |
| phenol                        | C <sub>6</sub> H <sub>6</sub> O                               | 108-95-2   | 94.11                         | 694.20 <sup>d</sup> | 229.00 <sup>d</sup>                           |
| phenylacetic acid             | C <sub>8</sub> H <sub>8</sub> O <sub>2</sub>                  | 103-82-2   | 136.15                        | 783.55 <sup>h</sup> | 422.60 <sup>h</sup>                           |
| phenylacetylene               | C <sub>8</sub> H <sub>6</sub>                                 | 536-74-3   | 102.14                        | 655.43 <sup>c</sup> | 337.50 <sup>c</sup>                           |
| phenylbutazone                | C <sub>19</sub> H <sub>20</sub> N <sub>2</sub> O <sub>2</sub> | 50-33-9    | 308.38                        | 861.18 <sup>h</sup> | 933.55 <sup>h</sup>                           |
| 1-phenyldodecane              | C <sub>18</sub> H <sub>30</sub>                               | 123-01-3   | 246.44                        | 774.26 <sup>c</sup> | 1000.00 <sup>c</sup>                          |
| 1-phenylethanol               | C <sub>8</sub> H <sub>10</sub> O                              | 98-85-1    | 122.17                        | 675.30 <sup>i</sup> | 392.15 <sup>j</sup>                           |
| 2-phenylethanol               | C <sub>8</sub> H <sub>10</sub> O                              | 60-12-8    | 122.17                        | 684.00 <sup>c</sup> | 387.00 <sup>c</sup>                           |
| 2-phenylethyl acetate         | C <sub>10</sub> H <sub>12</sub> O <sub>2</sub>                | 103-45-7   | 164.1                         | 712.23 <sup>i</sup> | 524.15 <sup>i</sup>                           |
| 1-phenylhexane                | C <sub>12</sub> H <sub>18</sub>                               | 1077-16-3  | 162.28                        | 698.00 <sup>c</sup> | 618.00 <sup>c</sup>                           |



| Compound                    | Formula                                         | CAS number | $M$<br>(g mol <sup>-1</sup> ) | $T_c$<br>(K)         | $V_c$<br>(cm <sup>3</sup> mol <sup>-1</sup> ) |
|-----------------------------|-------------------------------------------------|------------|-------------------------------|----------------------|-----------------------------------------------|
| phenylmethanol              | C <sub>7</sub> H <sub>8</sub> O                 | 100-51-6   | 108.14                        | 720.20 <sup>d</sup>  | 335.00 <sup>c</sup>                           |
| 1-phenyloctane              | C <sub>14</sub> H <sub>22</sub>                 | 2189-60-8  | 190.33                        | 729.00 <sup>c</sup>  | 703.00 <sup>c</sup>                           |
| 3-phenylpropyl acetate      | C <sub>11</sub> H <sub>14</sub> O <sub>2</sub>  | 122-72-5   | 178.3                         | 718.70 <sup>i</sup>  | 580.37 <sup>i</sup>                           |
| $\alpha$ -pinene            | C <sub>10</sub> H <sub>16</sub>                 | 80-56-8    | 136.24                        | 632.00 <sup>c</sup>  | 504.00 <sup>c</sup>                           |
| $\beta$ -pinene             | C <sub>10</sub> H <sub>16</sub>                 | 127-91-3   | 136.24                        | 643.00 <sup>c</sup>  | 506.00 <sup>c</sup>                           |
| 2-piperidineethanol         | C <sub>7</sub> H <sub>15</sub> NO               | 1484-84-0  | 129.2                         | 745.14 <sup>h</sup>  | 418.40 <sup>h</sup>                           |
| potassium chloride          | KCl                                             | 7447-40-7  | 74.55                         | 3470.00 <sup>g</sup> | 625.00 <sup>g</sup>                           |
| propanamide                 | C <sub>3</sub> H <sub>7</sub> NO                | 79-16-3    | 73.09                         | 718.00 <sup>c</sup>  | 267.00 <sup>c</sup>                           |
| propane                     | C <sub>3</sub> H <sub>8</sub>                   | 74-98-6    | 44.09                         | 369.80 <sup>d</sup>  | 203.00 <sup>d</sup>                           |
| 1-propanol                  | C <sub>3</sub> H <sub>8</sub> O                 | 71-23-8    | 60.1                          | 536.80 <sup>d</sup>  | 219.00 <sup>d</sup>                           |
| 2-phenyl-1-propanol         | C <sub>9</sub> H <sub>12</sub> O                | 1123-85-9  | 136.2                         | 662.02 <sup>i</sup>  | 443.23 <sup>i</sup>                           |
| 3-phenyl-1-propanol         | C <sub>9</sub> H <sub>12</sub> O                | 122-97-4   | 136.2                         | 702.30 <sup>i</sup>  | 455.45 <sup>i</sup>                           |
| 2,2-dimethyl-1-propanol     | C <sub>5</sub> H <sub>12</sub> O                | 75-84-3    | 88.15                         | 550.00 <sup>c</sup>  | 327.00 <sup>c</sup>                           |
| 2-amino-2-methyl-1-propanol | C <sub>4</sub> H <sub>11</sub> NO               | 124-68-5   | 89.14                         | 619.80 <sup>k</sup>  | 315.00 <sup>k</sup>                           |
| 2-methyl-2-propanol         | C <sub>4</sub> H <sub>10</sub> O                | 75-65-0    | 74.12                         | 506.20 <sup>c</sup>  | 275.00 <sup>c</sup>                           |
| 2-propanol                  | C <sub>3</sub> H <sub>8</sub> O                 | 67-63-0    | 60.1                          | 508.30 <sup>d</sup>  | 220.00 <sup>d</sup>                           |
| propene                     | C <sub>3</sub> H <sub>6</sub>                   | 115-07-1   | 42.08                         | 364.90 <sup>d</sup>  | 181.00 <sup>d</sup>                           |
| <i>i</i> -propylbenzene     | C <sub>9</sub> H <sub>12</sub>                  | 98-82-8    | 120.19                        | 631.10 <sup>d</sup>  | 427.70 <sup>c</sup>                           |
| <i>n</i> -propylbenzene     | C <sub>9</sub> H <sub>12</sub>                  | 103-65-1   | 120.19                        | 638.20 <sup>d</sup>  | 440.00 <sup>d</sup>                           |
| propylene glycol            | C <sub>3</sub> H <sub>8</sub> O <sub>2</sub>    | 57-55-6    | 76.09                         | 626.00 <sup>c</sup>  | 239.00 <sup>c</sup>                           |
| pyrene                      | C <sub>16</sub> H <sub>10</sub>                 | 129-00-0   | 202.25                        | 936.00 <sup>c</sup>  | 630.00 <sup>c</sup>                           |
| piperazine (PZ)             | C <sub>4</sub> H <sub>10</sub> N <sub>2</sub>   | 110-85-0   | 86.14                         | 638.00 <sup>c</sup>  | 310.00 <sup>c</sup>                           |
| quercetin                   | C <sub>15</sub> H <sub>10</sub> O <sub>7</sub>  | 117-39-5   | 302.24                        | 1468.74 <sup>j</sup> | 730.50 <sup>j</sup>                           |
| radon                       | Rn                                              | 10043-92-2 | 222                           | 377.40 <sup>c</sup>  | 140.00 <sup>c</sup>                           |
| salicylic acid              | C <sub>7</sub> H <sub>6</sub> O <sub>3</sub>    | 69-72-7    | 138.12                        | 739.00 <sup>c</sup>  | 364.00 <sup>c</sup>                           |
| serine                      | C <sub>3</sub> H <sub>7</sub> NO <sub>3</sub>   | 56-45-1    | 105.09                        | 804.97 <sup>h</sup>  | 268.35 <sup>h</sup>                           |
| squalene                    | C <sub>30</sub> H <sub>50</sub>                 | 111-02-4   | 410.73                        | 716.50 <sup>u</sup>  | 1601.00 <sup>j</sup>                          |
| stearic acid                | C <sub>18</sub> H <sub>36</sub> O <sub>2</sub>  | 57-11-4    | 284.48                        | 803.00 <sup>k</sup>  | 1140.00 <sup>k</sup>                          |
| stearic acid ethyl ester    | C <sub>20</sub> H <sub>40</sub> O <sub>2</sub>  | 111-61-5   | 312.53                        | 777.90 <sup>k</sup>  | 1380.00 <sup>k</sup>                          |
| styrene                     | C <sub>8</sub> H <sub>8</sub>                   | 100-42-5   | 104.15                        | 647.00 <sup>d</sup>  | 352.00 <sup>c</sup>                           |
| sucrose                     | C <sub>12</sub> H <sub>22</sub> O <sub>11</sub> | 57-50-1    | 342.3                         | 1086.00 <sup>g</sup> | 761.00 <sup>g</sup>                           |
| sulfolane                   | C <sub>4</sub> H <sub>8</sub> O <sub>2</sub> S  | 126-33-0   | 120.17                        | 849.00 <sup>c</sup>  | 300.00 <sup>c</sup>                           |
| sulfur dioxide              | SO <sub>2</sub>                                 | 05/09/7446 | 64.06                         | 430.75 <sup>c</sup>  | 122.00 <sup>c</sup>                           |
| sulfur hexafluoride         | SF <sub>6</sub>                                 | 2551-62-4  | 146.05                        | 318.70 <sup>d</sup>  | 198.80 <sup>d</sup>                           |
| tetrabutyltin               | C <sub>16</sub> H <sub>36</sub> Sn              | 1461-25-2  | 347.17                        | 767.97 <sup>f</sup>  | 760.75 <sup>f</sup>                           |
| <i>n</i> -tetradecane       | C <sub>14</sub> H <sub>30</sub>                 | 629-59-4   | 198.39                        | 693.00 <sup>d</sup>  | 830.00 <sup>d</sup>                           |
| 1-tetradecene               | C <sub>14</sub> H <sub>28</sub>                 | 1120-36-1  | 196.37                        | 691.00 <sup>k</sup>  | 865.00 <sup>k</sup>                           |
| tetraethylene glycol        | C <sub>8</sub> H <sub>18</sub> O <sub>5</sub>   | 112-60-7   | 194.23                        | 722.00 <sup>c</sup>  | 564.00 <sup>c</sup>                           |
| tetraethyltin               | C <sub>8</sub> H <sub>20</sub> Sn               | 597-64-8   | 234.95                        | 655.92 <sup>f</sup>  | 429.28 <sup>f</sup>                           |

| Compound                                | Formula                                                       | CAS number | $M$<br>(g mol <sup>-1</sup> ) | $T_c$<br>(K)         | $V_c$<br>(cm <sup>3</sup> mol <sup>-1</sup> ) |
|-----------------------------------------|---------------------------------------------------------------|------------|-------------------------------|----------------------|-----------------------------------------------|
| 1,2,3,5-tetrafluorobenzene              | C <sub>6</sub> H <sub>2</sub> F <sub>4</sub>                  | 2367-82-0  | 150.08                        | 555.49 <sup>h</sup>  | 351.05 <sup>h</sup>                           |
| 1,2,4,5-tetrafluorobenzene              | C <sub>6</sub> H <sub>2</sub> F <sub>4</sub>                  | 327-54-8   | 150.07                        | 535.25 <sup>o</sup>  | 351.05 <sup>h</sup>                           |
| tetrahydrofuran                         | C <sub>4</sub> H <sub>8</sub> O                               | 109-99-9   | 72.11                         | 540.10 <sup>d</sup>  | 224.00 <sup>d</sup>                           |
| 2,2,4,4-tetramethyl-3-pentanone         | C <sub>9</sub> H <sub>18</sub> O                              | 815-24-7   | 142.24                        | 627.18 <sup>f</sup>  | 407.72 <sup>f</sup>                           |
| tetramethyltin                          | C <sub>4</sub> H <sub>12</sub> Sn                             | 594-27-4   | 178.85                        | 511.77 <sup>f</sup>  | 263.54 <sup>f</sup>                           |
| tetrapropyltin                          | C <sub>12</sub> H <sub>28</sub> Sn                            | 2176-98-9  | 291.06                        | 759.88 <sup>f</sup>  | 595.01 <sup>f</sup>                           |
| thenoyltrifluoroacetone                 | C <sub>8</sub> H <sub>5</sub> F <sub>3</sub> O <sub>2</sub> S | 326-91-0   | 222.18                        | 838.69 <sup>f</sup>  | 428.15 <sup>f</sup>                           |
| threonine                               | C <sub>4</sub> H <sub>9</sub> NO <sub>3</sub>                 | 72-19-5    | 119.12                        | 859.80 <sup>h</sup>  | 304.40 <sup>h</sup>                           |
| $\alpha$ -tocopherol                    | C <sub>29</sub> H <sub>50</sub> O <sub>2</sub>                | 10191-41-0 | 430.71                        | 915.76 <sup>r</sup>  | 1534.20 <sup>r</sup>                          |
| toluene                                 | C <sub>7</sub> H <sub>8</sub>                                 | 108-88-3   | 92.14                         | 591.80 <sup>d</sup>  | 316.00 <sup>d</sup>                           |
| triarachidonin                          | C <sub>63</sub> H <sub>98</sub> O <sub>6</sub>                | 23314-57-0 | 951.45                        | 1499.66 <sup>f</sup> | 2341.53 <sup>f</sup>                          |
| 1,2,4-trichlorobenzene                  | C <sub>6</sub> H <sub>3</sub> Cl <sub>3</sub>                 | 120-82-1   | 181.45                        | 725.00 <sup>c</sup>  | 395.00 <sup>c</sup>                           |
| trierucin                               | C <sub>69</sub> H <sub>128</sub> O <sub>6</sub>               | 2752-99-0  | 1053.75                       | 1549.28 <sup>f</sup> | 2832.93 <sup>f</sup>                          |
| triethanolamine                         | C <sub>6</sub> H <sub>15</sub> N <sub>3</sub> O <sub>3</sub>  | 102-71-6   | 149.19                        | 772.10 <sup>g</sup>  | 472.00 <sup>g</sup>                           |
| triethylene glycol                      | C <sub>6</sub> H <sub>14</sub> O <sub>4</sub>                 | 112-27-6   | 150.18                        | 700.00 <sup>c</sup>  | 443.00 <sup>c</sup>                           |
| trifluoroacetylacetone                  | C <sub>5</sub> H <sub>5</sub> F <sub>3</sub> O <sub>2</sub>   | 367-57-7   | 154.09                        | 594.02 <sup>b</sup>  | 365.58 <sup>b</sup>                           |
| 1,2,4-trifluorobenzene                  | C <sub>6</sub> H <sub>3</sub> F <sub>3</sub>                  | 367-23-7   | 132.09                        | 558.22 <sup>h</sup>  | 335.05 <sup>h</sup>                           |
| 1,3,5-trimethylbenzene                  | C <sub>9</sub> H <sub>12</sub>                                | 108-67-8   | 120.19                        | 637.30 <sup>d</sup>  | 433.00 <sup>c</sup>                           |
| 2,2,4-trimethylpentane                  | C <sub>8</sub> H <sub>18</sub>                                | 540-84-1   | 144.23                        | 543.80 <sup>c</sup>  | 468.00 <sup>c</sup>                           |
| trinervonin                             | C <sub>75</sub> H <sub>140</sub> O <sub>6</sub>               | 81913-24-8 | 1137.91                       | 1601.10 <sup>f</sup> | 3081.54 <sup>f</sup>                          |
| triolein                                | C <sub>57</sub> H <sub>104</sub> O <sub>6</sub>               | 122-32-7   | 885.43                        | 1640.00 <sup>g</sup> | 3090.00 <sup>g</sup>                          |
| s-trioxane                              | C <sub>3</sub> H <sub>6</sub> O <sub>3</sub>                  | 110-88-3   | 90.08                         | 604.00 <sup>c</sup>  | 206.00 <sup>c</sup>                           |
| ubiquinone CoQ10                        | C <sub>59</sub> H <sub>90</sub> O <sub>4</sub>                | 303-98-0   | 863.34                        | 1522.50 <sup>f</sup> | 2146.17 <sup>f</sup>                          |
| <i>n</i> -undecane                      | C <sub>11</sub> H <sub>24</sub>                               | 1120-21-4  | 156.31                        | 638.80 <sup>d</sup>  | 660.00 <sup>d</sup>                           |
| 6-undecanone                            | C <sub>11</sub> H <sub>22</sub> O                             | 927-49-1   | 170.3                         | 678.01 <sup>g</sup>  | 657.50 <sup>g</sup>                           |
| valine                                  | C <sub>5</sub> H <sub>11</sub> NO <sub>2</sub>                | 72-18-4    | 117.15                        | 741.96 <sup>h</sup>  | 356.50 <sup>h</sup>                           |
| vanadyl(II) acetylacetonate             | VO(acac) <sub>2</sub>                                         | 3153-26-2  | 265.16                        | 652.70 <sup>f</sup>  | 445.30 <sup>f</sup>                           |
| vanillin                                | C <sub>8</sub> H <sub>8</sub> O <sub>3</sub>                  | 121-33-5   | 152.15                        | 777.00 <sup>c</sup>  | 415.00 <sup>c</sup>                           |
| vitamin K <sub>1</sub>                  | C <sub>31</sub> H <sub>48</sub> O <sub>2</sub>                | 84-80-0    | 452.71                        | 1329.54 <sup>h</sup> | 1620.20 <sup>h</sup>                          |
| vitamin K <sub>3</sub>                  | C <sub>11</sub> H <sub>8</sub> O <sub>2</sub>                 | 58-27-5    | 172.18                        | 893.85 <sup>h</sup>  | 537.20 <sup>h</sup>                           |
| water                                   | H <sub>2</sub> O                                              | 7732-18-5  | 18.02                         | 647.30 <sup>d</sup>  | 57.10 <sup>d</sup>                            |
| xenon                                   | Xe                                                            | 7440-63-3  | 131.3                         | 289.70 <sup>d</sup>  | 118.40 <sup>d</sup>                           |
| 5- <i>tert</i> -butyl- <i>m</i> -xylene | C <sub>12</sub> H <sub>18</sub>                               | 98-19-1    | 162.28                        | 684.85 <sup>i</sup>  | 591.75 <sup>i</sup>                           |
| <i>m</i> -xylene                        | C <sub>8</sub> H <sub>10</sub>                                | 108-38-3   | 106.17                        | 617.10 <sup>d</sup>  | 376.00 <sup>d</sup>                           |
| <i>o</i> -xylene                        | C <sub>8</sub> H <sub>10</sub>                                | 95-47-6    | 106.17                        | 630.30 <sup>d</sup>  | 369.00 <sup>d</sup>                           |
| <i>p</i> -xylene                        | C <sub>8</sub> H <sub>10</sub>                                | 106-42-3   | 106.17                        | 616.20 <sup>d</sup>  | 379.00 <sup>d</sup>                           |
| xylitol                                 | C <sub>5</sub> H <sub>12</sub> O <sub>5</sub>                 | 87-99-0    | 152.15                        | 1032.99 <sup>k</sup> | 399.00 <sup>k</sup>                           |
| xylose                                  | C <sub>5</sub> H <sub>10</sub> O <sub>5</sub>                 | 25990-60-7 | 150.13                        | 953.50 <sup>k</sup>  | 388.00 <sup>k</sup>                           |

<sup>a</sup>Taken from Valderrama and Rojas [1]; <sup>b</sup>Average of the values by the Joback [2–4] and Somayajulu [5] methods; <sup>c</sup>Taken from Yaws (1998) [6]; <sup>d</sup>Taken from Reid *et al.* [7]; <sup>e</sup>Taken from Nikitin and Popov [8];

<sup>f</sup>Estimated by the Klincewicz method [9,10]; <sup>g</sup>Taken from Yaws (2008) [6]; <sup>h</sup>Average of the values by the Joback [2–4] and Ambrose [9,11] methods; <sup>i</sup>Average of the values by the Joback [2–4] and Wen-Qiang [12] methods; <sup>j</sup>Estimated by the Joback method [2–4]; <sup>l</sup>Taken from Pizarro et al [13]; <sup>k</sup>Taken from DIPPR database [14]; <sup>m</sup>Taken from Table 4 of Liu and Ruckenstein [15]; <sup>n</sup>Average of the values by the Joback [2–4] and Constantinou-Gani [16] methods; <sup>o</sup>Taken from Korea Thermophysical Properties Data Bank (KDB) [17]; <sup>p</sup>Taken from Zêzere *et al.* [18]; <sup>q</sup>Taken from Leite *et al.* [19]; <sup>r</sup>Taken from Aspen database; <sup>s</sup>Taken from Poling [4]; <sup>t</sup>Taken from Magalhães *et al.* [20]; <sup>u</sup>Taken from Catchpole *et al.* [21].

**Table S2.** Polar solvents systems studied, number of data point (NDP), reduced number density range ( $\rho_{n,1}^*$  range), absolute temperature range ( $T$  range), binary interaction parameters ( $k_{12}$  and  $B_{12}$ ), average absolute relative deviations (AARD) and source of the diffusion data.

| Solvent                | Solute                  | NDP | $\rho_{n,1}^*$ range | $T$ range<br>(K) | $k_{12}$ | $B_{12}$ | AARD<br>(%) | Data source |
|------------------------|-------------------------|-----|----------------------|------------------|----------|----------|-------------|-------------|
| <b>Polar systems</b>   |                         |     |                      |                  |          |          |             |             |
| acetone                | benzene                 | 4   | 0.817-0.918          | 268.20-328.20    | 0.25605  | 2.30400  | 0.35        | [22]        |
|                        | biphenyl                | 7   | 0.817-0.918          | 268.20-328.20    | 0.18832  | 1.21603  | 0.4         | [22]        |
|                        | chlorobenzene           | 12  | 0.817-0.918          | 268.20-328.20    | 0.25829  | 2.14041  | 0.67        | [22]        |
|                        | ethylbenzene            | 7   | 0.817-0.918          | 268.20-328.20    | 0.26830  | 2.25498  | 0.46        | [22]        |
|                        | naphthalene             | 5   | 0.817-0.918          | 268.20-328.20    | 0.22500  | 1.50436  | 0.46        | [22]        |
|                        | <i>n</i> -propylbenzene | 5   | 0.817-0.918          | 268.20-328.20    | 0.23700  | 1.78685  | 0.74        | [22]        |
|                        | toluene                 | 5   | 0.817-0.918          | 268.20-328.20    | 0.27635  | 2.43819  | 0.4         | [22]        |
|                        | 1,2,4-trichlorobenzene  | 6   | 0.817-0.918          | 268.20-328.20    | 0.21125  | 1.63602  | 0.93        | [22]        |
|                        | 1,3,5-trimethylbenzene  | 5   | 0.817-0.918          | 268.20-328.20    | 0.24201  | 1.96628  | 0.46        | [22]        |
|                        | water                   | 6   | 0.817-0.867          | 298.15-328.15    | 0.62778  | 34.61652 | 0.89        | [23]        |
| <i>n</i> -butanol      | ammonia                 | 6   | 0.866-0.938          | 298.15-348.15    | -3.91416 | -4.37610 | 8.4         | [24]        |
|                        | carbon dioxide          | 12  | 0.858-0.938          | 298.15-348.15    | -0.57025 | -1.67764 | 4.32        | [24]        |
|                        | propane                 | 8   | 0.861-0.940          | 298.15-348.15    | -0.90270 | -2.76134 | 3.09        | [24]        |
|                        | propene                 | 7   | 0.859-0.943          | 298.15-348.20    | -0.86623 | -2.83098 | 3.29        | [24]        |
| chlorobenzene          | propene                 | 7   | 0.886-0.956          | 298.15-348.20    | 0.16735  | 3.75283  | 1.2         | [25,26]     |
| chlorotrifluoromethane | acetone                 | 7   | 0.191-0.464          | 313.15-313.15    | 0.61264  | 13.85654 | 2.31        | [27]        |
|                        | 1,3-dibromobenzene      | 6   | 0.191-0.485          | 318.15-318.15    | 0.50307  | 6.47803  | 5.96        | [27]        |
|                        | <i>p</i> -xylene        | 12  | 0.191-0.485          | 318.15-318.15    | 0.81469  | 58.54792 | 3           | [27]        |
| deuterium oxide        | oxygen                  | 12  | 0.896-0.992          | 276.85-369.75    | -0.21381 | -5.54592 | 4.43        | [28]        |

| Solvent | Solute                           | NDP | $\rho_{n,1}^*$ range | $T$ range<br>(K) | $k_{12}$ | $B_{12}$ | AARD<br>(%) | Data source |
|---------|----------------------------------|-----|----------------------|------------------|----------|----------|-------------|-------------|
| ethanol | acetylferrocene                  | 7   | 0.830-0.843          | 322.90-332.50    | -1.19730 | -0.68531 | 0           | [29]        |
|         | aluminum acetylacetonate         | 4   | 0.828-0.899          | 300.15-333.20    | -1.17095 | -1.60137 | 8.57        | [30]        |
|         | ammonia                          | 8   | 0.839-0.884          | 298.15-323.15    | -2.19069 | -2.94112 | 5.18        | [24]        |
|         | benzene                          | 3   | 0.406-0.906          | 278.20-554.00    | -0.68969 | -1.22218 | 8.73        | [31,32]     |
|         | benzonitrile                     | 3   | 0.841-0.868          | 303.00-323.00    | -1.15661 | -1.26926 | 1.69        | [33]        |
|         | benzyl acetate                   | 4   | 0.839-0.881          | 313.16-333.16    | -0.91862 | -0.88023 | 2.95        | [34]        |
|         | 1,2-butanediol                   | 4   | 0.769-0.906          | 278.20-372.00    | -2.25374 | -1.76681 | 1.77        | [32]        |
|         | 1,4-butanediol                   | 4   | 0.769-0.906          | 278.20-372.00    | -2.42504 | -1.64303 | 1.1         | [32]        |
|         | 1-butanol                        | 4   | 0.769-0.906          | 278.20-372.00    | -1.79960 | -1.74126 | 1.09        | [32]        |
|         | carbon dioxide                   | 4   | 0.800-0.886          | 298.15-348.15    | -0.24809 | -0.92307 | 4.36        | [24]        |
|         | chromium(III)<br>acetylacetonate | 3   | 0.827-0.875          | 299.15-333.15    | -2.54330 | -1.28065 | 1.12        | [35,36]     |
|         | dibenzyl ether                   | 4   | 0.839-0.881          | 313.16-333.16    | -1.05058 | -1.06518 | 3.68        | [34]        |
|         | disperse blue 14                 | 4   | 0.849-0.862          | 308.20-318.20    | -2.53415 | -1.23491 | 4.84        | [37]        |
|         | disperse orange 11               | 4   | 0.836-0.862          | 308.20-328.20    | -2.30560 | -1.21107 | 0.47        | [37]        |
|         | ethylene glycol                  | 4   | 0.769-0.906          | 278.20-372.00    | -2.33394 | -1.70534 | 2.89        | [32]        |
|         | eucalyptol                       | 4   | 0.830-0.878          | 303.15-333.15    | -1.29243 | -1.20283 | 2.47        | [18]        |
|         | gallic acid                      | 8   | 0.830-0.878          | 303.15-333.15    | -2.87189 | -0.94638 | 3.66        | [19]        |
|         | glycerol                         | 11  | 0.769-0.906          | 278.20-372.00    | -2.53053 | -1.57400 | 1.1         | [32]        |
|         | ibuprofen                        | 9   | 0.840-0.890          | 298.15-333.15    | -1.17781 | -0.64238 | 6.75        | [38]        |
|         | naphthalene                      | 11  | 0.406-0.774          | 373.20-554.00    | -0.33041 | -0.57019 | 6.6         | [31]        |
|         | nickel(II) acetylacetonate       | 10  | 0.827-0.865          | 307.15-333.15    | -2.12763 | -1.38225 | 1.45        | [30]        |

| Solvent         | Solute                           | NDP | $\rho_{n,1}^*$ range | $T$ range<br>(K) | $k_{12}$ | $B_{12}$ | AARD<br>(%) | Data source |
|-----------------|----------------------------------|-----|----------------------|------------------|----------|----------|-------------|-------------|
|                 | nitrous oxide                    | 5   | 0.827-0.878          | 298.10-333.00    | -0.31006 | -1.27869 | 0.2         | [39]        |
|                 | palladium(II)<br>acetylacetonate | 4   | 0.827-0.865          | 307.15-333.15    | -1.78235 | -1.21953 | 0.5         | [35]        |
|                 | phenanthrene                     | 9   | 0.406-0.584          | 473.40-554.00    | 0.52281  | 4.90578  | 2.4         | [31]        |
|                 | phenylbutazone                   | 9   | 0.828-0.876          | 298.15-333.15    | -3.31207 | -1.49768 | 2           | [40]        |
|                 | 2-phenylethyl acetate            | 5   | 0.839-0.881          | 313.16-333.16    | -1.03589 | -1.03165 | 3.26        | [34]        |
|                 | 3-phenylpropyl acetate           | 5   | 0.839-0.881          | 313.16-333.16    | -0.77846 | -0.42988 | 4.63        | [34]        |
|                 | propane                          | 4   | 0.800-0.884          | 298.15-348.15    | -0.80476 | -2.17026 | 2.69        | [24]        |
|                 | propene                          | 5   | 0.800-0.884          | 298.15-348.15    | -0.62799 | -1.87207 | 3.13        | [24]        |
|                 | quercetin                        | 9   | 0.830-0.883          | 303.15-333.15    | -2.34905 | -0.79172 | 5.28        | [41]        |
|                 | toluene                          | 5   | 0.406-0.774          | 373.20-554.00    | 0.01548  | 0.19645  | 6.33        | [31]        |
|                 | 1,3,5-trimethylbenzene           | 4   | 0.406-0.774          | 373.20-554.00    | -0.42827 | -0.76163 | 6.51        | [31]        |
|                 | vanadyl(II) acetylacetonate      | 4   | 0.827-0.865          | 307.15-333.15    | -1.74794 | -1.40301 | 1.01        | [35]        |
|                 | water                            | 4   | 0.767-0.906          | 278.20-373.20    | -3.85108 | -2.30682 | 3.09        | [23,32,42]  |
| ethyl acetate   | astaxanthin                      | 4   | 0.838-0.895          | 303.15-333.15    | -0.20068 | 0.33324  | 0.85        | [43]        |
|                 | quercetin                        | 5   | 0.838-0.899          | 303.15-333.15    | -0.22279 | 0.38481  | 0.49        | [41]        |
|                 | squalene                         | 5   | 0.838-0.899          | 303.15-333.15    | -0.18141 | -0.00837 | 0.83        | [43]        |
| ethylene glycol | propene                          | 5   | 1.025-1.084          | 298.15-348.20    | 0.13158  | 8.45657  | 1.53        | [25,26]     |
| methanol        | [Bmim][bti]                      | 5   | 0.841-0.912          | 283.00-333.00    | -0.27284 | -0.57579 | 3.24        | [44,45]     |
|                 | [Emim][bti]                      | 5   | 0.841-0.912          | 283.00-333.00    | -0.38873 | -0.74305 | 2.79        | [44,45]     |
|                 | [Hmim][bti]                      | 6   | 0.841-0.912          | 283.00-333.00    | -0.42124 | -0.70958 | 1.42        | [45]        |
|                 | [Omim][bti]                      | 9   | 0.841-0.912          | 283.00-333.00    | -0.44843 | -0.72057 | 1.15        | [45]        |

| Solvent    | Solute                       | NDP | $\rho_{n,1}^*$ range | $T$ range<br>(K) | $k_{12}$ | $B_{12}$ | AARD<br>(%) | Data source |
|------------|------------------------------|-----|----------------------|------------------|----------|----------|-------------|-------------|
|            | acetonitrile                 | 11  | 0.868-1.037          | 283.20-313.20    | 0.63237  | 26.43757 | 6.32        | [46]        |
|            | acetylferrocene              | 6   | 0.839-0.868          | 312.90-333.40    | -0.27697 | 0.08106  | 0.38        | [29]        |
|            | ammonia                      | 6   | 0.811-0.897          | 298.15-348.15    | -1.06661 | -2.15019 | 5.9         | [24]        |
|            | benzene                      | 4   | 0.592-0.870          | 313.20-473.40    | -0.17357 | -0.72611 | 2           | [47]        |
|            | carbon dioxide               | 9   | 0.811-0.897          | 298.15-348.15    | 0.10684  | -0.31895 | 2.66        | [24]        |
|            | carbon monoxide              | 11  | 0.797-0.890          | 298.85-363.15    | 0.58176  | 43.18334 | 3.59        | [48]        |
|            | <i>p</i> -chloronitrobenzene | 13  | 0.829-0.866          | 323.20-343.20    | -0.31467 | -0.89839 | 0.8         | [49]        |
|            | disperse blue 14             | 6   | 0.849-0.875          | 308.20-328.20    | -0.75549 | -0.93907 | 0.62        | [37]        |
|            | disperse orange 11           | 4   | 0.849-0.875          | 308.20-328.20    | -0.79002 | -0.99818 | 1.11        | [37]        |
|            | naphthalene                  | 4   | 0.592-0.870          | 313.20-473.40    | -0.21867 | -0.66330 | 2.92        | [47]        |
|            | phenanthrene                 | 4   | 0.592-0.870          | 313.20-473.40    | -0.29778 | -0.70599 | 2.97        | [47]        |
|            | propane                      | 4   | 0.811-0.898          | 298.15-348.15    | 0.11309  | 1.02890  | 2.06        | [24]        |
|            | toluene                      | 4   | 0.592-0.870          | 313.20-473.40    | -0.14344 | -0.60799 | 2.7         | [47]        |
|            | 1,3,5-trimethylbenzene       | 10  | 0.592-0.870          | 313.20-473.40    | -0.23615 | -0.76164 | 2.7         | [47]        |
|            | vitamin K <sub>3</sub>       | 10  | 0.868-0.868          | 313.20-313.20    | 0.03769  | 0.48572  | 0.45        | [50]        |
|            | water                        | 5   | 0.870-0.919          | 278.20-313.15    | -1.19711 | -1.50370 | 1.48        | [51]        |
| 1-propanol | ammonia                      | 5   | 0.832-0.910          | 298.15-348.15    | -3.65824 | -3.81134 | 6.09        | [24]        |
|            | carbon dioxide               | 10  | 0.834-0.911          | 298.15-348.15    | -0.71701 | -2.54500 | 2.75        | [24]        |
|            | propane                      | 5   | 0.832-0.909          | 298.15-348.15    | -1.06376 | -2.80502 | 3.27        | [24]        |
|            | propene                      | 5   | 0.832-0.910          | 298.15-348.15    | -0.94533 | -2.69304 | 2.79        | [24]        |
|            | water                        | 7   | 0.847-0.903          | 298.15-338.15    | -5.90091 | -2.70509 | 4.26        | [52]        |
| 2-propanol | benzene                      | 48  | 0.430-0.771          | 373.20-536.00    | -0.65622 | -1.17026 | 11.57       | [47]        |

| Solvent | Solute                | NDP | $\rho_{n,1}^*$ range | $T$ range<br>(K) | $k_{12}$ | $B_{12}$ | AARD<br>(%) | Data source |
|---------|-----------------------|-----|----------------------|------------------|----------|----------|-------------|-------------|
|         | <i>n</i> -decane      | 10  | 0.430-0.830          | 333.20-536.00    | -1.04297 | -1.24802 | 10.29       | [47]        |
|         | naphthalene           | 8   | 0.430-0.771          | 373.20-536.00    | -0.80790 | -0.95772 | 11.24       | [47]        |
|         | phenanthrene          | 7   | 0.430-0.771          | 373.20-536.00    | -0.86111 | -0.83019 | 8.89        | [47]        |
|         | <i>n</i> -tetradecane | 7   | 0.430-0.771          | 373.20-536.00    | -0.83255 | -0.96523 | 8.97        | [47]        |
|         | toluene               | 7   | 0.430-0.771          | 373.20-536.00    | -0.65698 | -1.09578 | 11.13       | [47]        |
|         | water                 | 4   | 0.819-0.879          | 298.15-338.15    | -7.03715 | -2.55482 | 1.75        | [52]        |



**Table S3.** Water solvent systems studied, number of data point (NDP), reduced number density range ( $\rho_{n,1}^*$  range), absolute temperature range ( $T$  range), binary interaction parameters ( $k_{12}$  and  $B_{12}$ ), average absolute relative deviations (AARD) and source of the diffusion data.

| Solvent              | Solute                                                 | NDP | $\rho_{n,1}^*$ range | $T$ range<br>(K) | $k_{12}$ | $B_{12}$ | AARD<br>(%) | Data source |
|----------------------|--------------------------------------------------------|-----|----------------------|------------------|----------|----------|-------------|-------------|
| <b>Water systems</b> |                                                        |     |                      |                  |          |          |             |             |
| water                | [Bmim][BF <sub>4</sub> ]                               | 11  | 0.973-1.010          | 283.00-333.00    | 0.52865  | 1.36518  | 0.91        | [45,53]     |
|                      | [Bmim][bti]                                            | 18  | 0.973-1.010          | 283.00-333.00    | 0.52815  | 1.09666  | 4.09        | [45,54,55]  |
|                      | [Bmim][CF <sub>3</sub> SO <sub>3</sub> ]               | 5   | 0.982-0.998          | 303.20-323.20    | 0.60840  | 5.98941  | 1.31        | [53]        |
|                      | [Bmim][Cl]                                             | 6   | 0.973-1.010          | 283.00-333.00    | 0.50863  | 0.56736  | 0.85        | [45]        |
|                      | [Bmim][MeSO <sub>4</sub> ]                             | 5   | 0.982-0.998          | 303.20-323.20    | 0.71478  | 14.25897 | 1.19        | [53]        |
|                      | [Bmim][OcSO <sub>4</sub> ]                             | 6   | 0.990-1.008          | 288.15-313.15    | 0.50771  | 0.24793  | 3.69        | [55]        |
|                      | [Bmim][PF <sub>6</sub> ]                               | 5   | 0.982-0.998          | 303.20-323.20    | 0.54719  | 1.62941  | 1.28        | [53]        |
|                      | [Emim][BF <sub>4</sub> ]                               | 5   | 0.982-0.998          | 303.20-323.20    | 0.57725  | 4.07603  | 1.38        | [54]        |
|                      | [Emim][bti]                                            | 18  | 0.973-1.010          | 283.00-333.00    | 0.53195  | 1.16066  | 3.52        | [44,45,55]  |
|                      | [Emim][C <sub>2</sub> H <sub>5</sub> SO <sub>4</sub> ] | 11  | 0.982-1.008          | 288.15-323.20    | 0.53970  | 2.06441  | 2.83        | [54,55]     |
|                      | [Emim][C <sub>2</sub> N <sub>3</sub> ]                 | 5   | 0.982-0.998          | 303.20-323.20    | 0.52456  | 1.20970  | 0.38        | [54]        |
|                      | [Emim][CF <sub>3</sub> SO <sub>3</sub> ]               | 5   | 0.982-0.998          | 303.20-323.20    | 0.47108  | 0.06212  | 1.62        | [54]        |
|                      | [Emim][MDEGSO <sub>4</sub> ]                           | 5   | 0.982-0.998          | 303.20-323.20    | 0.50173  | 0.80939  | 2.41        | [54]        |
|                      | [Hmim][bti]                                            | 6   | 0.973-1.010          | 283.00-333.00    | 0.54010  | 1.40123  | 1.98        | [45]        |
|                      | [Omim][bti]                                            | 6   | 0.973-1.010          | 283.00-333.00    | 0.58356  | 2.78023  | 2.36        | [45]        |
|                      | acetamide                                              | 4   | 0.992-1.013          | 277.15-310.15    | 0.11296  | -4.32983 | 4.67        | [56]        |
|                      | acetone                                                | 4   | 0.977-1.001          | 298.15-328.15    | 0.40628  | 1.77907  | 0.93        | [23]        |
|                      | alanine                                                | 6   | 0.973-1.004          | 293.20-333.20    | 0.16576  | -1.91976 | 0.86        | [57]        |
|                      | alloisoleucine                                         | 6   | 0.973-1.004          | 293.20-333.20    | 0.26028  | -1.02208 | 0.58        | [57]        |
|                      | allothreonine                                          | 6   | 0.973-1.004          | 293.20-333.20    | 0.22652  | -1.22615 | 0.58        | [58]        |
|                      | ammonia                                                | 5   | 0.973-1.004          | 293.00-333.00    | -0.02810 | -6.12836 | 2.74        | [59]        |
|                      | arabinose                                              | 6   | 0.954-1.015          | 273.20-353.20    | 0.27140  | -0.65475 | 2.52        | [60]        |

| Solvent | Solute                                  | NDP | $\rho_{n,1}^*$ range | $T$ range<br>(K) | $k_{12}$ | $B_{12}$  | AARD<br>(%) | Data source                           |
|---------|-----------------------------------------|-----|----------------------|------------------|----------|-----------|-------------|---------------------------------------|
|         | argon                                   | 8   | 0.994-1.015          | 273.20-308.00    | -0.42718 | -17.59434 | 2.92        | [61]                                  |
|         | benzene                                 | 24  | 0.935-1.014          | 275.15-372.00    | 0.29281  | -1.83559  | 4.62        | [62–65]                               |
|         | benzoic acid                            | 12  | 0.969-1.010          | 283.15-338.15    | 0.30948  | -1.53658  | 1.11        | [66]                                  |
|         | biphenyl                                | 7   | 0.935-1.013          | 278.20-372.50    | 0.35362  | -0.55432  | 1.64        | [65]                                  |
|         | n-butane                                | 16  | 0.973-1.013          | 277.15-333.15    | 0.06315  | -5.71001  | 7.3         | [62,67,68]                            |
|         | 1,2-butanediol                          | 5   | 0.935-1.013          | 278.20-372.50    | 0.27822  | -1.12415  | 5.16        | [32]                                  |
|         | 1,3-butanediol                          | 5   | 0.959-1.001          | 298.00-348.00    | 0.25840  | -1.22577  | 1.07        | [69]                                  |
|         | 1,4-butanediol                          | 5   | 0.935-1.013          | 278.20-372.50    | 0.27474  | -1.14167  | 4.44        | [32]                                  |
|         | 1-butanol                               | 13  | 0.935-1.013          | 277.15-372.00    | 0.24445  | -1.85130  | 4.52        | [56,70,71]                            |
|         | 2-methyl-1-butanol                      | 6   | 0.954-1.015          | 273.20-353.20    | 0.24630  | -2.35907  | 4.28        | [72]                                  |
|         | 3-methyl-1-butanol                      | 6   | 0.954-1.015          | 273.20-353.20    | 0.24301  | -2.29088  | 4.62        | [72]                                  |
|         | 2-methyl-2-butanol                      | 6   | 0.954-1.015          | 273.20-353.20    | 0.22374  | -2.54516  | 4.92        | [72]                                  |
|         | 3-methyl-2-butanol                      | 6   | 0.954-1.015          | 273.20-353.20    | 0.24891  | -2.22753  | 4.59        | [72]                                  |
|         | <i>n</i> -butylbenzene                  | 7   | 0.935-1.013          | 278.20-372.50    | 0.30745  | -1.14779  | 1.93        | [65]                                  |
|         | $\alpha$ -amino- <i>n</i> -butyric acid | 6   | 0.973-1.004          | 293.20-333.20    | 0.23475  | -1.42859  | 0.71        | [57]                                  |
|         | caffeine                                | 22  | 0.969-1.004          | 293.15-338.15    | 0.33250  | -0.28458  | 0.92        | [73–75]                               |
|         | camphor                                 | 8   | 0.986-1.010          | 283.15-318.15    | 0.32226  | -0.96978  | 1.46        | [66]                                  |
|         | carbon dioxide                          | 111 | 0.940-1.015          | 273.20-368.00    | 0.17358  | -6.06031  | 5.17        | [59,61,67,68,76–80]<br>[81–89][90–98] |
|         | cinnamic acid                           | 8   | 0.986-1.010          | 283.15-318.15    | 0.29408  | -2.60915  | 1.62        | [66]                                  |
|         | $\alpha$ -cyclodextrin                  | 4   | 0.991-1.001          | 298.15-312.15    | 0.34724  | 0.43247   | 1.32        | [99]                                  |
|         | $\beta$ -cyclodextrin                   | 4   | 0.991-1.001          | 298.15-312.15    | 0.32190  | 0.14803   | 1.87        | [100]                                 |
|         | cyclohexane                             | 10  | 0.973-1.014          | 275.15-333.15    | 0.24249  | -2.57607  | 6.56        | [62,63]                               |
|         | cyclopentane                            | 10  | 0.973-1.014          | 275.15-333.15    | 0.21202  | -2.81080  | 2.95        | [62,63]                               |
|         | diethanolamine                          | 5   | 0.959-1.001          | 298.00-348.00    | 0.29822  | -0.60829  | 0.68        | [101]                                 |
|         | diethylene glycol                       | 5   | 0.982-0.998          | 303.20-323.20    | 0.31092  | -0.36908  | 0.87        | [102]                                 |

| Solvent | Solute                          | NDP | $\rho_{n,1}^*$ range | $T$ range<br>(K) | $k_{12}$ | $B_{12}$  | AARD<br>(%) | Data source      |
|---------|---------------------------------|-----|----------------------|------------------|----------|-----------|-------------|------------------|
|         | <i>N,N</i> -diethylethanolamine | 5   | 0.962-0.996          | 303.15-343.15    | 0.28693  | -0.42148  | 0.41        | [103,104]        |
|         | diglycolamine                   | 5   | 0.964-0.998          | 303.15-343.15    | 0.30147  | -0.25730  | 0.28        | [105]            |
|         | diisopropanolamine              | 5   | 0.959-1.001          | 298.00-348.00    | 0.27630  | -0.74476  | 2.58        | [101]            |
|         | dipropylene glycol              | 5   | 0.982-0.998          | 303.20-323.20    | 0.39347  | 2.28996   | 0.63        | [106]            |
|         | dimethylethanolamine<br>(DMEA)  | 5   | 0.962-0.996          | 303.15-343.15    | 0.28085  | 0.00423   | 1.45        | [103,104,107]    |
|         | <i>meso</i> -erythritol         | 5   | 0.935-1.013          | 278.20-372.50    | 0.25912  | -0.67481  | 3.99        | [32]             |
|         | ethane                          | 16  | 0.973-1.013          | 277.15-333.15    | 0.12384  | -6.28928  | 6.87        | [62,67,108]      |
|         | ethanol                         | 22  | 0.935-1.009          | 285.65-372.00    | 0.26134  | -1.74453  | 3.44        | [23,42,56,70,71] |
|         | ethylbenzene                    | 16  | 0.939-1.014          | 275.15-368.20    | 0.31913  | -0.82257  | 4.32        | [62-64]          |
|         | ethylene glycol                 | 9   | 0.954-1.001          | 298.20-353.20    | 0.24859  | -1.47686  | 1.52        | [71,102]         |
|         | 1-ethylnaphthalene              | 7   | 0.935-1.013          | 278.20-372.50    | 0.32914  | -0.69771  | 2.02        | [65]             |
|         | formamide                       | 4   | 0.992-1.013          | 277.15-310.15    | 0.20577  | -3.80312  | 5.41        | [56]             |
|         | fructose                        | 4   | 0.991-1.001          | 298.15-312.15    | 0.27614  | 0.30135   | 0.52        | [109]            |
|         | furfural                        | 7   | 0.954-1.001          | 298.20-353.20    | 0.35442  | -0.70268  | 1.53        | [110]            |
|         | 5-(hydroxymethyl) furfural      | 7   | 0.954-1.001          | 298.20-353.20    | 0.33463  | -0.53108  | 1.01        | [110]            |
|         | galactose                       | 6   | 0.954-1.015          | 273.20-353.20    | 0.28446  | -0.48122  | 2.48        | [60]             |
|         | glucose                         | 10  | 0.954-1.015          | 273.20-353.20    | 0.23420  | -0.87311  | 1.67        | [60,109]         |
|         | glycerol                        | 10  | 0.954-1.013          | 278.20-353.20    | 0.25979  | -1.19987  | 4.03        | [69,71]          |
|         | glycine                         | 6   | 0.973-1.004          | 293.20-333.20    | 0.26553  | -1.28508  | 1.05        | [57]             |
|         | guaiacol                        | 7   | 0.954-1.001          | 298.20-353.20    | 0.32076  | -0.81619  | 0.51        | [110]            |
|         | hexafluorobenzene               | 6   | 0.939-1.001          | 298.20-368.20    | 0.30543  | -0.77687  | 2.46        | [64]             |
|         | 1,2,6-hexanetriol               | 5   | 0.959-1.001          | 298.00-348.00    | 0.29757  | -0.43831  | 1.72        | [69]             |
|         | homoserine                      | 6   | 0.973-1.004          | 293.20-333.20    | 0.25430  | -1.09473  | 0.6         | [58]             |
|         | hydrogen                        | 6   | 0.994-1.010          | 283.15-308.15    | -2.15700 | -97.73803 | 9.51        | [68,111]         |
|         | hydrogen sulfide                | 22  | 0.940-1.008          | 288.15-368.00    | 0.31355  | -1.36227  | 3.8         | [67,95,112]      |

| Solvent | Solute                         | NDP | $\rho_{n,1}^*$ range | $T$ range<br>(K) | $k_{12}$ | $B_{12}$  | AARD<br>(%) | Data source     |
|---------|--------------------------------|-----|----------------------|------------------|----------|-----------|-------------|-----------------|
|         | <i>myo</i> -inositol           | 5   | 0.935-1.013          | 278.20-372.50    | 0.24881  | -0.67604  | 1.99        | [32]            |
|         | isobutyramide                  | 4   | 0.992-1.013          | 277.15-310.15    | 0.12798  | -4.47613  | 6.12        | [56]            |
|         | isoleucine                     | 6   | 0.973-1.004          | 293.20-333.20    | 0.25412  | -1.14983  | 0.6         | [57]            |
|         | krypton                        | 6   | 0.994-1.010          | 283.15-308.15    | -0.03806 | -11.64743 | 1.22        | [68,111]        |
|         | lactose                        | 5   | 0.986-1.001          | 298.15-318.15    | 0.31736  | 0.34812   | 0.74        | [109]           |
|         | leucine                        | 6   | 0.973-1.004          | 293.20-333.20    | 0.25166  | -1.16495  | 0.79        | [57]            |
|         | <i>tert</i> -leucine           | 6   | 0.973-1.004          | 293.20-333.20    | 0.23863  | -1.31213  | 0.9         | [57]            |
|         | mannitol                       | 5   | 0.935-1.013          | 278.20-372.50    | 0.26271  | -0.44580  | 2           | [32]            |
|         | mannose                        | 6   | 0.954-1.015          | 273.20-353.20    | 0.27583  | -0.65285  | 2.01        | [60]            |
|         | monoethanolamine (MEA)         | 9   | 0.962-1.001          | 298.15-343.15    | 0.36833  | 0.31345   | 3.38        | [101,104,107]   |
|         | methane                        | 32  | 0.964-1.013          | 278.00-342.80    | 0.01652  | -11.08869 | 5.36        | [61,62,67,108]  |
|         | methanol                       | 15  | 0.944-1.009          | 285.65-363.15    | 0.20075  | -3.25337  | 6.14        | [51,56,113–115] |
|         | methyl bromide                 | 6   | 0.994-1.010          | 283.00-308.00    | -0.03792 | -7.28746  | 1.11        | [61]            |
|         | methyl chloride                | 6   | 0.994-1.010          | 283.00-308.00    | -0.18564 | -9.19829  | 1.15        | [61]            |
|         | methyl fluoride                | 6   | 0.994-1.010          | 283.00-308.00    | -0.33512 | -12.92964 | 3.72        | [61]            |
|         | 2-methyl-2,4-pentanediol       | 5   | 0.959-1.001          | 298.00-348.00    | 0.26789  | -1.03766  | 0.61        | [69]            |
|         | methylcyclopentane             | 10  | 0.973-1.014          | 275.15-333.15    | 0.23407  | -2.14456  | 3.74        | [62,63]         |
|         | <i>n</i> -methyldiethanolamine | 5   | 0.959-1.001          | 298.00-348.00    | 0.27047  | -0.92842  | 0.73        | [101]           |
|         | <i>N</i> -methylpyrrolidone    | 5   | 0.959-1.001          | 298.00-348.00    | 0.32520  | -0.65032  | 0.76        | [69]            |
|         | monoisopropanolamine<br>(MIPA) | 5   | 0.962-0.996          | 303.15-343.15    | 0.22028  | -1.51899  | 1.1         | [104,107]       |
|         | naphthalene                    | 7   | 0.935-1.013          | 278.20-372.50    | 0.34537  | -0.88326  | 2.32        | [65]            |
|         | 2-naphthol                     | 16  | 0.939-1.010          | 283.15-368.15    | 0.39722  | -0.69114  | 2.79        | [66]            |
|         | neon                           | 6   | 0.994-1.010          | 283.15-308.15    | 0.00799  | -35.02102 | 1.11        | [68,111]        |
|         | nitrogen                       | 10  | 0.893-1.020          | 298.00-423.00    | 0.46340  | 6.57895   | 7.43        | [97]            |
|         | nitrous oxide                  | 78  | 0.939-1.008          | 288.00-368.15    | 0.16846  | -6.01209  | 7.55        | [95,96,116]     |

| Solvent | Solute                      | NDP | $\rho_{n,1}^*$ range | $T$ range<br>(K) | $k_{12}$ | $B_{12}$ | AARD<br>(%) | Data source   |
|---------|-----------------------------|-----|----------------------|------------------|----------|----------|-------------|---------------|
|         | norleucine                  | 6   | 0.973-1.004          | 293.20-333.20    | 0.26051  | -1.02458 | 0.58        | [57]          |
|         | norvaline                   | 6   | 0.973-1.004          | 293.20-333.20    | 0.24313  | -1.28928 | 0.43        | [57]          |
|         | oxygen                      | 34  | 0.939-1.011          | 282.35-368.15    | 0.18458  | -6.53108 | 5.63        | [28,117]      |
|         | pentaerythritol             | 6   | 0.935-1.013          | 278.20-372.20    | 0.28780  | -0.50717 | 3.03        | [71]          |
|         | <i>n</i> -pentane           | 8   | 0.973-1.013          | 277.15-333.15    | 0.23099  | -3.22012 | 7.12        | [62,67]       |
|         | 1-pentanol                  | 6   | 0.954-1.015          | 273.20-353.20    | 0.23776  | -2.51764 | 4.85        | [72]          |
|         | 2-pentanol                  | 6   | 0.954-1.015          | 273.20-353.20    | 0.26187  | -2.06253 | 5.13        | [72]          |
|         | 3-pentanol                  | 6   | 0.954-1.015          | 273.20-353.20    | 0.24794  | -2.30725 | 4.56        | [72]          |
|         | phenol                      | 17  | 0.502-1.012          | 298.20-648.42    | 0.42691  | 2.02936  | 10.77       | [110,118]     |
|         | 2-piperidineethanol         | 5   | 0.964-0.998          | 303.15-343.15    | 0.29065  | -0.43556 | 0.51        | [105]         |
|         | potassium chloride          | 30  | 0.880-1.028          | 298.00-423.15    | 0.65304  | 0.40267  | 15.26       | [101,103,119] |
|         | propanamide                 | 4   | 0.992-1.013          | 277.15-310.15    | 0.12900  | -4.39181 | 6.38        | [56]          |
|         | propane                     | 16  | 0.973-1.013          | 277.15-333.15    | 0.11701  | -5.77803 | 6.67        | [62,67,108]   |
|         | 1-propanol                  | 15  | 0.935-1.013          | 277.15-372.00    | 0.23117  | -2.15789 | 5.86        | [52,56,71]    |
|         | 2-amino-2-methyl-1-propanol | 5   | 0.964-0.998          | 303.15-343.15    | 0.29178  | -0.59819 | 0.75        | [105]         |
|         | 2,2-dimethyl-1-propanol     | 6   | 0.954-1.015          | 273.20-353.20    | 0.24439  | -2.37654 | 5.15        | [72]          |
|         | 2-propanol                  | 12  | 0.953-1.013          | 277.15-354.15    | 0.23226  | -2.24662 | 6.62        | [52,56,114]   |
|         | 2-methyl-2-propanol         | 9   | 0.935-1.013          | 278.20-372.50    | 0.20785  | -2.22607 | 7.01        | [71]          |
|         | propylene glycol            | 5   | 0.982-0.998          | 303.20-323.20    | 0.26334  | -1.37822 | 0.68        | [106]         |
|         | piperazine (PZ)             | 5   | 0.962-0.996          | 303.15-343.15    | 0.30426  | 0.24249  | 1.3         | [104,107]     |
|         | radon                       | 6   | 0.994-1.010          | 283.15-308.15    | -0.03671 | -7.01665 | 1.27        | [68]          |
|         | salicylic acid              | 13  | 0.964-1.010          | 283.15-343.15    | 0.35493  | -1.27324 | 1.31        | [66]          |
|         | serine                      | 6   | 0.973-1.004          | 293.20-333.20    | 0.22863  | -1.30671 | 0.56        | [58]          |
|         | sucrose                     | 10  | 0.954-1.015          | 273.20-353.20    | 0.31231  | 0.10757  | 1.79        | [60,109]      |
|         | sulfolane                   | 5   | 0.962-0.996          | 303.15-343.15    | 0.35029  | -0.31336 | 0.96        | [104]         |

| Solvent | Solute               | NDP | $\rho_{n,1}^*$ range | $T$ range<br>(K) | $k_{12}$ | $B_{12}$ | AARD<br>(%) | Data source |
|---------|----------------------|-----|----------------------|------------------|----------|----------|-------------|-------------|
|         | sulfur dioxide       | 4   | 0.994-1.004          | 293.15-308.15    | 0.21996  | -4.87093 | 0.32        | [86]        |
|         | tetraethylene glycol | 5   | 0.982-0.998          | 303.20-323.20    | 0.31313  | 0.40270  | 0.61        | [102]       |
|         | threonine            | 6   | 0.973-1.004          | 293.20-333.20    | 0.22262  | -1.15207 | 0.72        | [58]        |
|         | toluene              | 15  | 0.939-1.014          | 275.15-368.20    | 0.27118  | -1.84101 | 5.72        | [62-64]     |
|         | triethanolamine      | 5   | 0.964-0.998          | 303.15-343.15    | 0.30469  | -0.19831 | 0.32        | [105]       |
|         | triethylene glycol   | 5   | 0.982-0.998          | 303.20-323.20    | 0.36084  | 1.57284  | 0.35        | [102]       |
|         | valine               | 6   | 0.973-1.004          | 293.20-333.20    | 0.23744  | -1.35663 | 0.68        | [57]        |
|         | vanillin             | 7   | 0.954-1.001          | 298.20-353.20    | 0.31369  | -0.68948 | 0.49        | [110]       |
|         | xenon                | 6   | 0.994-1.010          | 283.15-308.15    | -0.05515 | -8.98504 | 1.31        | [68,111]    |
|         | xylitol              | 5   | 0.935-1.013          | 278.20-372.50    | 0.27673  | -0.53829 | 2.45        | [32]        |
|         | xylose               | 6   | 0.954-1.015          | 273.20-353.20    | 0.26993  | -0.69936 | 3.13        | [60]        |

**Table S4.** Non-polar solvent systems studied, number of data point (NDP), reduced number density range ( $\rho_{n,1}^*$  range), absolute temperature range ( $T$  range), binary interaction parameters ( $k_{12}$  and  $B_{12}$ ), average absolute relative deviations (AARD) and source of the diffusion data.

| Solvent                  | Solute                 | NDP | $\rho_{n,1}^*$ range | $T$ range<br>(K) | $k_{12}$ | $B_{12}$ | AARD<br>(%) | Data source |
|--------------------------|------------------------|-----|----------------------|------------------|----------|----------|-------------|-------------|
| <b>Non-Polar systems</b> |                        |     |                      |                  |          |          |             |             |
| cyclohexane              | acetone                | 4   | 0.846-0.886          | 303.20-333.20    | -0.99998 | -1.76875 | 0.26        | [120]       |
|                          | argon                  | 7   | 0.707-0.879          | 298.15-415.85    | -0.94976 | -4.14846 | 2.28        | [121]       |
|                          | benzene                | 12  | 0.503-0.886          | 298.20-523.20    | -0.97887 | -1.36443 | 2.62        | [120,122]   |
|                          | carbon tetrachloride   | 7   | 0.707-0.879          | 298.15-415.85    | -1.08414 | -1.26220 | 1.61        | [121]       |
|                          | 1,1'-dimethylferrocene | 5   | 0.857-0.876          | 313.15-323.15    | -1.11714 | -0.95520 | 3.25        | [123]       |
|                          | ethane                 | 5   | 0.784-0.909          | 280.50-363.20    | -0.83291 | -2.31941 | 1.28        | [124]       |
|                          | ethylene               | 5   | 0.784-0.909          | 280.50-363.20    | -0.81406 | -2.36780 | 0.73        | [124]       |
|                          | ethylferrocene         | 6   | 0.857-0.876          | 313.15-323.15    | -1.04914 | -0.79760 | 0.74        | [123]       |
|                          | ferrocene              | 5   | 0.857-0.876          | 313.15-323.15    | -1.11665 | -0.74016 | 3.27        | [123]       |
|                          | krypton                | 6   | 0.707-0.858          | 313.25-415.85    | -0.72136 | -2.23326 | 0.88        | [121]       |
|                          | methane                | 6   | 0.707-0.858          | 313.25-415.85    | -0.91351 | -3.91996 | 0.57        | [121]       |
|                          | naphthalene            | 12  | 0.503-0.886          | 298.20-523.20    | -0.91881 | -0.98873 | 1.84        | [120,122]   |
|                          | phenanthrene           | 8   | 0.503-0.879          | 298.20-523.20    | -1.00226 | -0.87699 | 2.7         | [122]       |
|                          | tetrabutyltin          | 7   | 0.707-0.879          | 298.15-415.85    | -1.59017 | -1.07932 | 2.17        | [121]       |
|                          | tetraethyltin          | 7   | 0.707-0.879          | 298.15-415.85    | -1.29726 | -1.13906 | 1.52        | [121]       |
|                          | tetramethyltin         | 7   | 0.707-0.879          | 298.15-415.85    | -1.20779 | -1.31927 | 1.61        | [121]       |
|                          | tetrapropyltin         | 6   | 0.707-0.879          | 298.15-415.85    | -1.35613 | -0.99509 | 1.61        | [121]       |
|                          | toluene                | 12  | 0.503-0.886          | 298.20-523.20    | -0.85461 | -1.16758 | 1.69        | [120,122]   |
|                          | 1,3,5-trimethylbenzene | 12  | 0.503-0.886          | 298.20-523.20    | -0.97415 | -1.13155 | 2.01        | [120,125]   |
|                          | xenon                  | 7   | 0.707-0.879          | 298.15-415.85    | -0.85317 | -1.78244 | 1.3         | [121]       |
|                          | <i>m</i> -xylene       | 4   | 0.846-0.886          | 303.20-333.20    | -0.90350 | -1.14622 | 1.13        | [120]       |
|                          | <i>p</i> -xylene       | 8   | 0.503-0.879          | 298.20-523.20    | -0.79997 | -1.07468 | 2.12        | [122]       |

| Solvent            | Solute                     | NDP | $\rho_{n,1}^*$ range | $T$ range<br>(K) | $k_{12}$ | $B_{12}$ | AARD<br>(%) | Data source |
|--------------------|----------------------------|-----|----------------------|------------------|----------|----------|-------------|-------------|
| <i>n</i> -decane   | argon                      | 3   | 0.783-0.970          | 298.00-433.00    | -0.09651 | 0.85628  | 1.88        | [126]       |
|                    | carbon tetrachloride       | 3   | 0.865-0.970          | 298.00-373.00    | -0.00520 | 1.26645  | 0.17        | [126]       |
|                    | 12-crown-4                 | 4   | 0.864-0.969          | 298.20-373.20    | -0.09776 | 0.67611  | 2.34        | [127]       |
|                    | 15-crown-5                 | 4   | 0.864-0.969          | 298.20-373.20    | -0.07705 | 1.04026  | 4.5         | [127]       |
|                    | 18-crown-6                 | 4   | 0.864-0.969          | 298.20-373.20    | -0.13023 | 0.71096  | 2.06        | [127]       |
|                    | dicyclohexano-18-crown-6   | 4   | 0.864-0.969          | 298.20-373.20    | -0.18586 | 0.46112  | 0.85        | [127]       |
|                    | dicyclohexano-24-crown-8   | 4   | 0.864-0.969          | 298.20-373.20    | -0.21455 | 0.42683  | 1.4         | [127]       |
|                    | krypton                    | 3   | 0.783-0.970          | 298.00-433.00    | -0.09584 | 0.73720  | 1.28        | [126]       |
|                    | tetrabutyltin              | 4   | 0.783-0.970          | 298.00-433.00    | -0.09901 | 1.16820  | 1.97        | [126]       |
|                    | tetraethyltin              | 4   | 0.783-0.970          | 298.00-433.00    | 0.13031  | 1.89101  | 1.75        | [126]       |
|                    | tetramethyltin             | 4   | 0.783-0.970          | 298.00-433.00    | -0.03276 | 1.62518  | 1.81        | [126]       |
|                    | tetrapropyltin             | 4   | 0.783-0.970          | 298.00-433.00    | -0.05994 | 1.26261  | 1.58        | [126]       |
|                    | s-trioxane                 | 4   | 0.864-0.969          | 298.20-373.20    | -0.05371 | 1.13517  | 0.45        | [127]       |
|                    | xenon                      | 8   | 0.783-0.992          | 283.15-433.00    | 0.19250  | 5.47973  | 3.72        | [126,128]   |
| 2,3-dimethylbutane | benzene                    | 11  | 0.401-0.539          | 523.20-548.20    | -0.03258 | 0.42952  | 1.24        | [129]       |
|                    | naphthalene                | 9   | 0.401-0.539          | 523.20-548.20    | 0.03232  | 0.61984  | 1.09        | [129]       |
|                    | phenanthrene               | 11  | 0.401-0.539          | 523.20-548.20    | 0.10585  | 0.95224  | 0.96        | [129]       |
|                    | toluene                    | 10  | 0.401-0.539          | 523.20-548.20    | 0.01486  | 0.62566  | 1.25        | [129]       |
| <i>n</i> -dodecane | acetone                    | 5   | 0.948-0.999          | 303.20-343.20    | -0.10306 | 1.24817  | 1.04        | [120]       |
|                    | benzene                    | 4   | 0.960-0.999          | 303.20-333.20    | -0.01865 | 2.38119  | 0.6         | [120]       |
|                    | carbon dioxide             | 9   | 0.629-0.984          | 304.15-567.15    | -0.18406 | -0.14044 | 3.04        | [130]       |
|                    | carbon monoxide            | 9   | 0.629-0.984          | 304.15-567.15    | 0.04926  | 6.46420  | 5.85        | [130]       |
|                    | <i>n</i> -decane           | 5   | 0.636-0.984          | 304.00-566.00    | 0.03589  | 1.39604  | 1.99        | [131]       |
|                    | <i>n</i> -hexadecane       | 5   | 0.636-0.984          | 304.00-566.00    | -0.06219 | 0.94291  | 3.28        | [131]       |
|                    | linoleic acid methyl ester | 4   | 0.960-0.999          | 303.20-333.20    | -0.12620 | 1.44332  | 0.25        | [120]       |



| Solvent            | Solute                 | NDP | $\rho_{n,1}^*$ range | $T$ range<br>(K) | $k_{12}$ | $B_{12}$ | AARD<br>(%) | Data source   |
|--------------------|------------------------|-----|----------------------|------------------|----------|----------|-------------|---------------|
|                    | naphthalene            | 5   | 0.948-0.999          | 303.20-343.20    | 0.07516  | 2.67099  | 1.35        | [120]         |
|                    | <i>n</i> -octane       | 9   | 0.636-0.984          | 304.00-566.00    | 0.00062  | 1.04852  | 1.24        | [131]         |
|                    | <i>n</i> -tetradecane  | 5   | 0.636-0.984          | 304.00-566.00    | 0.04835  | 1.69011  | 5.59        | [131]         |
|                    | toluene                | 4   | 0.960-0.999          | 303.30-333.20    | 0.06888  | 3.47694  | 1.23        | [120]         |
|                    | 1,3,5-trimethylbenzene | 4   | 0.960-0.999          | 303.20-333.20    | 0.00440  | 2.41818  | 0.93        | [120]         |
|                    | vitamin K <sub>3</sub> | 4   | 0.960-0.998          | 303.20-333.20    | 0.07031  | 2.00891  | 0.4         | [120]         |
|                    | <i>m</i> -xylene       | 4   | 0.960-0.999          | 303.20-333.20    | 0.10711  | 4.18011  | 0.88        | [120]         |
| <i>n</i> -eicosane | carbon dioxide         | 5   | 0.793-0.977          | 374.25-533.45    | -0.08617 | 2.75972  | 3.45        | [132]         |
|                    | carbon monoxide        | 5   | 0.793-0.977          | 374.25-533.45    | -0.22173 | 3.16627  | 4.31        | [132]         |
|                    | <i>n</i> -dodecane     | 5   | 0.793-0.977          | 374.95-533.55    | -0.05673 | 1.38497  | 3.06        | [132]         |
|                    | <i>n</i> -hexadecane   | 5   | 0.793-0.977          | 374.95-533.55    | -0.00752 | 1.97025  | 1.97        | [132]         |
|                    | <i>n</i> -octane       | 5   | 0.793-0.977          | 374.95-533.55    | -0.06544 | 1.35955  | 3.76        | [132]         |
| ethane             | 1-octene               | 6   | 0.429-0.562          | 296.20-322.20    | 0.76318  | 26.53913 | 3.83        | [133]         |
|                    | 1-tetradecene          | 9   | 0.428-0.570          | 293.20-322.20    | 0.33823  | 1.50634  | 1.85        | [133]         |
| <i>n</i> -heptane  | benzene                | 11  | 0.853-0.899          | 303.20-333.20    | 0.13287  | 1.68363  | 2.33        | [134,135]     |
|                    | <i>n</i> -decane       | 6   | 0.632-0.906          | 298.15-477.00    | 0.18070  | 1.89752  | 0.83        | [131,136]     |
|                    | <i>n</i> -dodecane     | 6   | 0.632-0.910          | 298.15-477.00    | 0.12723  | 1.41863  | 1.54        | [131,136]     |
|                    | ethylbenzene           | 4   | 0.853-0.899          | 303.20-333.20    | 0.20580  | 2.99935  | 0.14        | [135]         |
|                    | <i>n</i> -hexadecane   | 9   | 0.615-0.906          | 298.15-477.00    | 0.00353  | 0.66485  | 1.6         | [131,137]     |
|                    | <i>n</i> -hexane       | 11  | 0.853-0.930          | 283.00-333.00    | 0.14578  | 1.67072  | 1.21        | [138-140]     |
|                    | <i>n</i> -octane       | 13  | 0.632-0.914          | 293.00-477.00    | 0.09397  | 1.06147  | 1.57        | [131,138,141] |
|                    | <i>n</i> -tetradecane  | 6   | 0.632-0.910          | 298.15-477.00    | 0.14192  | 1.63129  | 1.72        | [131,136]     |
|                    | toluene                | 4   | 0.853-0.899          | 303.20-333.20    | 0.44464  | 8.44341  | 0.37        | [135]         |
|                    | 1,3,5-trimethylbenzene | 4   | 0.853-0.899          | 303.20-333.20    | 0.14830  | 2.06322  | 0.53        | [135]         |
|                    | 2,2,4-trimethylpentane | 4   | 0.868-0.891          | 308.15-323.15    | 0.07215  | 1.34296  | 0.26        | [141]         |

| Solvent              | Solute                     | NDP | $\rho_{n,1}^*$ range | $T$ range<br>(K) | $k_{12}$ | $B_{12}$ | AARD<br>(%) | Data source           |
|----------------------|----------------------------|-----|----------------------|------------------|----------|----------|-------------|-----------------------|
|                      | <i>o</i> -xylene           | 4   | 0.853-0.899          | 303.20-333.20    | 0.64538  | 25.10848 | 0.15        | [135]                 |
|                      | <i>p</i> -xylene           | 4   | 0.853-0.899          | 303.20-333.20    | 0.38684  | 5.82892  | 0.46        | [135]                 |
| <i>n</i> -hexadecane | carbon dioxide             | 10  | 0.679-0.986          | 323.15-564.15    | -0.27857 | 0.20087  | 2.29        | [130]                 |
|                      | carbon monoxide            | 10  | 0.679-0.986          | 323.15-564.15    | -0.32920 | 0.92762  | 4.57        | [130]                 |
|                      | <i>n</i> -decane           | 5   | 0.696-0.983          | 323.15-564.15    | -0.27285 | -0.31515 | 1.97        | [142]                 |
|                      | <i>n</i> -dodecane         | 5   | 0.696-0.983          | 323.15-564.15    | -0.15491 | 0.47574  | 1.17        | [142]                 |
|                      | <i>n</i> -octane           | 10  | 0.696-0.984          | 323.15-564.15    | -0.23865 | -0.15544 | 1.48        | [142]                 |
|                      | <i>n</i> -tetradecane      | 5   | 0.696-0.983          | 323.15-564.15    | -0.15140 | 0.50899  | 2.16        | [142]                 |
| <i>n</i> -hexane     | acetone                    | 5   | 0.834-0.877          | 303.20-333.20    | 0.09082  | 1.42164  | 2.07        | [120]                 |
|                      | acetonitrile               | 7   | 0.863-1.064          | 298.20-298.20    | 0.28856  | 4.96746  | 6.27        | [143]                 |
|                      | benzene                    | 48  | 0.380-1.058          | 213.20-543.20    | 0.17193  | 1.83003  | 6.06        | [120,124,125,143–147] |
|                      | carbon disulfide           | 10  | 0.863-1.063          | 298.20-298.20    | 0.35216  | 5.92373  | 9.86        | [143]                 |
|                      | carbon tetrabromide        | 8   | 0.864-1.058          | 298.15-298.15    | 0.39401  | 8.09433  | 22.48       | [148]                 |
|                      | <i>o</i> -difluorobenzene  | 7   | 0.806-1.005          | 213.20-333.20    | 0.20682  | 2.12792  | 2.59        | [147]                 |
|                      | <i>p</i> -difluorobenzene  | 7   | 0.806-1.005          | 213.20-333.20    | 0.23316  | 2.32080  | 0.7         | [147]                 |
|                      | 9,10-dimethylanthracene    | 7   | 0.864-1.042          | 298.15-298.15    | 0.51792  | 11.50959 | 14.57       | [148]                 |
|                      | 1,1'-dimethylferrocene     | 4   | 0.839-0.866          | 313.15-313.15    | -0.12998 | 0.55089  | 0.2         | [123]                 |
|                      | ethylferrocene             | 4   | 0.839-0.866          | 313.15-313.15    | -0.15202 | 0.42538  | 0.15        | [123]                 |
|                      | ferrocene                  | 4   | 0.839-0.866          | 313.15-313.15    | -0.13382 | 0.37529  | 0.2         | [123]                 |
|                      | <i>n</i> -heptane          | 11  | 0.817-0.888          | 283.00-398.00    | 0.00601  | 0.48172  | 5.57        | [138–140,149]         |
|                      | hexafluorobenzene          | 7   | 0.806-1.005          | 213.20-333.20    | 0.30757  | 4.09154  | 2.07        | [147]                 |
|                      | indole                     | 2   | 0.861-0.873          | 313.20-313.20    | -0.04069 | 0.07991  | 0           | [120]                 |
|                      | linoleic acid methyl ester | 2   | 0.861-0.873          | 313.20-313.20    | 0.25029  | 3.51321  | 0           | [120]                 |
|                      | naphthalene                | 21  | 0.380-0.875          | 298.15-543.20    | 0.02615  | 0.52119  | 4.31        | [120,125,143,144]     |
|                      | octafluorotoluene          | 7   | 0.806-1.005          | 213.20-333.20    | 0.30312  | 4.06106  | 2.45        | [147]                 |

| Solvent          | Solute                     | NDP | $\rho_{n,1}^*$ range | $T$ range<br>(K) | $k_{12}$ | $B_{12}$ | AARD<br>(%) | Data source       |
|------------------|----------------------------|-----|----------------------|------------------|----------|----------|-------------|-------------------|
|                  | <i>n</i> -octane           | 7   | 0.817-0.869          | 295.00-328.00    | 0.07885  | 1.04919  | 0.36        | [138,149]         |
|                  | pentafluorobenzene         | 7   | 0.806-1.005          | 213.20-333.20    | 0.33643  | 4.77299  | 2.2         | [147]             |
|                  | phenanthrene               | 15  | 0.380-0.807          | 333.20-543.20    | 0.07098  | 0.66932  | 4.57        | [125]             |
|                  | pyrene                     | 8   | 0.864-1.058          | 298.15-298.15    | 0.34687  | 10.45121 | 21.89       | [144,148]         |
|                  | 1,2,3,5-tetrafluorobenzene | 7   | 0.806-1.005          | 213.20-333.20    | 0.29722  | 3.09569  | 2.78        | [147]             |
|                  | 1,2,4,5-tetrafluorobenzene | 7   | 0.806-1.005          | 213.20-333.20    | 0.28385  | 2.99616  | 1.91        | [147]             |
|                  | toluene                    | 32  | 0.380-1.061          | 298.15-543.20    | 0.23061  | 2.50601  | 7.61        | [120,125,150,151] |
|                  | 1,2,4-trifluorobenzene     | 7   | 0.806-1.005          | 213.20-333.20    | 0.29651  | 3.25699  | 2.67        | [147]             |
|                  | 1,3,5-trimethylbenzene     | 20  | 0.380-0.875          | 303.20-543.20    | -0.03623 | 0.40118  | 3.51        | [120,125]         |
|                  | vitamin K <sub>3</sub>     | 5   | 0.862-0.873          | 313.20-313.20    | 0.77847  | 50.92952 | 0.4         | [120,152]         |
|                  | <i>m</i> -xylene           | 5   | 0.834-0.877          | 303.20-333.20    | -0.14250 | -0.23973 | 2.18        | [120]             |
|                  | <i>p</i> -xylene           | 17  | 0.380-0.873          | 313.20-543.20    | -0.07620 | 0.14052  | 5.14        | [120,125]         |
| <i>n</i> -octane | argon                      | 4   | 0.775-0.937          | 298.00-403.00    | 0.10348  | 4.26793  | 0.91        | [126]             |
|                  | benzene                    | 8   | 0.885-0.929          | 303.20-333.20    | 0.30540  | 5.01801  | 0.18        | [135,153]         |
|                  | carbon tetrachloride       | 4   | 0.827-0.937          | 298.00-373.00    | 0.11638  | 1.83525  | 0.43        | [126]             |
|                  | ethylbenzene               | 8   | 0.885-0.929          | 303.20-333.20    | 0.47833  | 13.09162 | 1.47        | [135,153]         |
|                  | <i>n</i> -heptane          | 7   | 0.871-0.945          | 293.00-343.00    | 0.21198  | 2.77075  | 0.73        | [138,154]         |
|                  | <i>n</i> -hexane           | 6   | 0.885-0.942          | 295.00-333.00    | -0.00023 | 0.16762  | 0.86        | [138]             |
|                  | krypton                    | 4   | 0.775-0.937          | 298.00-403.00    | 0.07118  | 2.54908  | 0.71        | [126]             |
|                  | methane                    | 4   | 0.775-0.937          | 298.00-403.00    | -0.10515 | 0.66788  | 1.18        | [126]             |
|                  | tetrabutyltin              | 4   | 0.739-0.937          | 298.00-433.00    | -0.04388 | 0.93694  | 1.4         | [126]             |
|                  | tetraethyltin              | 5   | 0.739-0.937          | 298.00-433.00    | 0.04782  | 1.36630  | 4.84        | [126]             |
|                  | tetramethyltin             | 4   | 0.739-0.937          | 298.00-433.00    | 0.05732  | 1.79520  | 0.36        | [126]             |
|                  | tetrapropyltin             | 4   | 0.739-0.937          | 298.00-433.00    | -0.01033 | 1.04338  | 0.46        | [126]             |
|                  | toluene                    | 8   | 0.885-0.929          | 303.20-333.20    | 0.52387  | 15.43289 | 1.42        | [135,153]         |

| Solvent               | Solute                 | NDP | $\rho_{n,1}^*$ range | $T$ range<br>(K) | $k_{12}$ | $B_{12}$ | AARD<br>(%) | Data source |
|-----------------------|------------------------|-----|----------------------|------------------|----------|----------|-------------|-------------|
|                       | 1,3,5-trimethylbenzene | 8   | 0.885-0.929          | 303.20-333.20    | 0.12676  | 2.13992  | 0.43        | [135,153]   |
|                       | xenon                  | 8   | 0.775-0.959          | 283.15-403.00    | 0.39781  | 10.76050 | 4.89        | [126,128]   |
|                       | <i>o</i> -xylene       | 8   | 0.885-0.929          | 303.20-333.20    | 0.16370  | 2.07088  | 0.82        | [135,153]   |
|                       | <i>p</i> -xylene       | 8   | 0.885-0.929          | 303.20-333.20    | 0.16241  | 1.62376  | 0.69        | [135,153]   |
| propane               | 1-octene               | 8   | 0.585-0.697          | 296.50-337.50    | 0.31072  | 2.51472  | 1.59        | [133]       |
|                       | 1-tetradecene          | 8   | 0.606-0.705          | 292.50-337.40    | 0.81421  | 43.88873 | 1.76        | [133]       |
| sulfur hexafluoride   | benzene                | 9   | 0.116-0.539          | 328.00-328.00    | 0.03318  | 0.74521  | 6.24        | [27]        |
|                       | benzoic acid           | 6   | 0.352-0.539          | 328.20-338.20    | -0.11493 | 0.42950  | 1.84        | [155]       |
|                       | carbon tetrachloride   | 7   | 0.116-0.539          | 328.00-328.00    | -0.19119 | 0.12578  | 7.52        | [27]        |
|                       | naphthalene            | 5   | 0.427-0.576          | 318.20-328.20    | -0.46893 | -0.53952 | 5.79        | [155]       |
|                       | toluene                | 11  | 0.116-0.539          | 328.00-328.00    | 0.17557  | 1.49396  | 5.46        | [27]        |
|                       | 1,3,5-trimethylbenzene | 10  | 0.193-0.539          | 328.00-328.00    | 0.16632  | 1.40391  | 3.74        | [27]        |
|                       | <i>p</i> -xylene       | 52  | 0.116-0.650          | 283.20-338.15    | -0.00033 | 0.50720  | 5.68        | [27]        |
| <i>n</i> -tetradecane | acridine               | 8   | 0.801-0.970          | 333.20-473.15    | 0.01804  | 2.24474  | 4.08        | [156]       |
|                       | argon                  | 4   | 0.854-1.013          | 298.00-430.00    | 0.21924  | 16.93113 | 3.11        | [126]       |
|                       | benzothiophene         | 7   | 0.826-0.970          | 333.20-453.20    | -0.33312 | 0.09757  | 2.36        | [156]       |
|                       | carbon tetrachloride   | 4   | 0.921-1.013          | 298.00-374.00    | -0.04611 | 2.90522  | 0.58        | [126]       |
|                       | dibenzothiophene       | 8   | 0.813-0.970          | 333.20-463.20    | -0.22664 | 0.56996  | 4.1         | [156]       |
|                       | krypton                | 4   | 0.854-1.013          | 298.00-430.00    | 0.13416  | 7.91996  | 2.41        | [126]       |
|                       | methane                | 4   | 0.854-1.013          | 298.00-430.00    | -0.23313 | 2.26854  | 7.85        | [126]       |
|                       | naphthalene            | 7   | 0.826-0.995          | 313.20-453.20    | -0.17348 | 0.35564  | 3.32        | [156]       |
|                       | tetrabutyltin          | 4   | 0.854-1.013          | 298.00-430.00    | -0.22454 | 1.28179  | 1.62        | [126]       |
|                       | tetraethyltin          | 4   | 0.854-1.013          | 298.00-430.00    | -0.13720 | 1.63681  | 1.29        | [126]       |
|                       | tetramethyltin         | 4   | 0.854-1.013          | 298.00-430.00    | -0.18410 | 1.36224  | 0.95        | [126]       |
|                       | tetrapropyltin         | 4   | 0.854-1.013          | 298.00-430.00    | -0.16872 | 1.40527  | 0.71        | [126]       |

| Solvent                | Solute                 | NDP | $\rho_{n,1}^*$ range | $T$ range<br>(K) | $k_{12}$ | $B_{12}$  | AARD<br>(%) | Data source |
|------------------------|------------------------|-----|----------------------|------------------|----------|-----------|-------------|-------------|
|                        | xenon                  | 8   | 0.854-1.032          | 283.15-430.00    | 0.06084  | 4.54353   | 5.15        | [126,128]   |
| 2,2,4-trimethylpentane | benzene                | 4   | 0.651-0.684          | 303.20-333.20    | 0.54031  | 25.73093  | 5           | [153]       |
|                        | 1,3,5-trimethylbenzene | 4   | 0.651-0.684          | 303.20-333.20    | 0.68248  | 56.85121  | 7.7         | [153]       |
|                        | ethylbenzene           | 4   | 0.651-0.684          | 303.20-333.20    | 0.63060  | 39.48716  | 3.65        | [153]       |
|                        | toluene                | 4   | 0.651-0.684          | 303.20-333.20    | 0.57565  | 28.01625  | 4.39        | [153]       |
|                        | <i>o</i> -xylene       | 4   | 0.651-0.684          | 303.20-333.20    | 0.82761  | 178.58484 | 5.86        | [153]       |
|                        | <i>p</i> -xylene       | 4   | 0.651-0.684          | 303.20-333.20    | 0.74454  | 72.40594  | 2.68        | [153]       |

**Table S5.** SC-CO<sub>2</sub> solvent systems studied, number of data point (NDP), reduced number density range ( $\rho_{n,1}^*$  range), absolute temperature range ( $T$  range), binary interaction parameters ( $k_{12}$  and  $B_{12}$ ), average absolute relative deviations (AARD) and source of the diffusion data.

| Solvent                          | Solute                                                         | NDP | $\rho_{n,1}^*$ range | $T$ range<br>(K) | $k_{12}$ | $B_{12}$ | AARD<br>(%) | Data source   |
|----------------------------------|----------------------------------------------------------------|-----|----------------------|------------------|----------|----------|-------------|---------------|
| <b>SC-CO<sub>2</sub> systems</b> |                                                                |     |                      |                  |          |          |             |               |
| carbon dioxide                   | acetone                                                        | 213 | 0.218-0.589          | 303.15-333.15    | 0.04553  | 0.32822  | 3.84        | [157–161]     |
|                                  | acetylferrocene                                                | 24  | 0.251-0.472          | 313.00-372.70    | -0.23523 | -0.16124 | 4.67        | [29]          |
|                                  | acridine                                                       | 6   | 0.426-0.555          | 308.15-328.15    | 0.45449  | 2.83796  | 1.26        | [162]         |
|                                  | adamantanone                                                   | 8   | 0.376-0.470          | 313.45-313.45    | 0.38365  | 1.33278  | 2.29        | [163]         |
|                                  | allylbenzene                                                   | 15  | 0.363-0.565          | 313.16-333.16    | 0.40934  | 2.97617  | 1.9         | [164]         |
|                                  | aluminum acetylacetonate                                       | 84  | 0.201-0.588          | 308.15-333.15    | 0.61164  | 10.95789 | 7.7         | [30]          |
|                                  | aniline                                                        | 15  | 0.363-0.541          | 313.16-333.16    | 0.38735  | 3.65582  | 2.49        | [165]         |
|                                  | anisole                                                        | 15  | 0.363-0.565          | 313.00-333.00    | 0.12107  | 0.73485  | 1.93        | [166]         |
|                                  | anthracene                                                     | 22  | 0.215-0.564          | 313.00-333.00    | 0.02025  | 0.10628  | 0.44        | [167]         |
|                                  | arachidonic acid (AA)                                          | 75  | 0.331-0.564          | 308.15-343.15    | 0.41685  | 2.00746  | 2.47        | [168]         |
|                                  | AA ethyl ester                                                 | 48  | 0.299-0.514          | 308.15-338.15    | 0.12009  | 0.34741  | 0.92        | [169]         |
|                                  | behenic acid ethyl ester                                       | 17  | 0.361-0.514          | 308.00-318.00    | 0.07806  | 0.16505  | 0.67        | [170]         |
|                                  | benzene                                                        | 249 | 0.168-0.565          | 303.15-333.15    | 0.38669  | 2.41159  | 6.8         | [158,171–178] |
|                                  | benzoic acid                                                   | 35  | 0.324-0.555          | 293.15-328.15    | 0.22502  | 1.03677  | 5.24        | [162,179–181] |
|                                  | benzyl acetate                                                 | 15  | 0.363-0.565          | 313.16-333.16    | 0.13810  | 0.77642  | 1.91        | [34]          |
|                                  | benzylacetone                                                  | 15  | 0.363-0.565          | 313.16-333.16    | 0.20190  | 1.07523  | 2.06        | [182]         |
|                                  | biphenyl                                                       | 24  | 0.324-0.556          | 293.15-323.15    | 0.46807  | 2.76765  | 2.91        | [181]         |
|                                  | 2-bromoanisole                                                 | 15  | 0.363-0.565          | 313.16-333.16    | 0.13949  | 0.83615  | 1.93        | [164]         |
|                                  | bromobenzene                                                   | 21  | 0.363-0.565          | 313.00-333.00    | 0.05687  | 0.36678  | 4.35        | [183,184]     |
|                                  | 2-butanone                                                     | 40  | 0.352-0.575          | 308.15-328.15    | 0.10700  | 0.52037  | 1.6         | [159,184,185] |
|                                  | <i>N</i> -(4-methoxybenzylidene)-<br>4- <i>n</i> -butylaniline | 5   | 0.432-0.479          | 313.45-313.45    | -0.09218 | -0.15264 | 0.23        | [163]         |

| Solvent | Solute                                 | NDP | $\rho_{n,1}^*$ range | $T$ range<br>(K) | $k_{12}$ | $B_{12}$ | AARD<br>(%) | Data source |
|---------|----------------------------------------|-----|----------------------|------------------|----------|----------|-------------|-------------|
|         | <i>n</i> -butylbenzene                 | 15  | 0.363-0.565          | 313.00-333.00    | 0.22796  | 1.06094  | 1.62        | [186]       |
|         | <i>sec</i> -butylbenzene               | 15  | 0.363-0.565          | 313.00-333.00    | 0.11977  | 0.59033  | 1.9         | [13]        |
|         | <i>tert</i> -butylbenzene              | 15  | 0.363-0.565          | 313.00-333.00    | -0.01652 | 0.07490  | 3.02        | [187]       |
|         | butyric acid ethyl ester               | 16  | 0.361-0.514          | 308.00-318.00    | -0.12516 | -0.14767 | 1.89        | [188,189]   |
|         | caffeine                               | 25  | 0.260-0.489          | 308.00-333.15    | 0.71487  | 13.32417 | 4.15        | [190–192]   |
|         | capric acid ethyl ester                | 16  | 0.361-0.514          | 308.00-318.00    | -0.02908 | 0.01267  | 1.26        | [188,189]   |
|         | caprylic acid ethyl ester              | 16  | 0.361-0.514          | 308.00-318.00    | -0.04902 | -0.00440 | 1.5         | [188,189]   |
|         | $\beta$ -carotene                      | 90  | 0.376-0.564          | 308.15-333.15    | 0.41649  | 1.51020  | 0.94        | [193–195]   |
|         | L-carvone                              | 27  | 0.388-0.563          | 308.15-338.15    | -0.24023 | -0.27104 | 2.98        | [196,197]   |
|         | chlorobenzene                          | 21  | 0.363-0.565          | 313.00-333.00    | 0.08985  | 0.52518  | 3.19        | [183,184]   |
|         | chromium(III)<br>acetylacetonate       | 104 | 0.240-0.589          | 308.15-343.15    | 0.30738  | 1.71763  | 4.15        | [36,198]    |
|         | chrysene                               | 4   | 0.478-0.534          | 303.15-333.15    | 0.29031  | 0.92354  | 0.67        | [158]       |
|         | citral                                 | 15  | 0.267-0.509          | 313.15-333.15    | 0.14094  | 0.55670  | 2.51        | [199]       |
|         | cobalt(III) acetylacetonate            | 38  | 0.362-0.578          | 313.15-333.15    | 0.04975  | 0.66805  | 1.39        | [200]       |
|         | copper(II)<br>trifluoroacetylacetonate | 12  | 0.363-0.499          | 308.15-318.15    | 0.14910  | 1.78495  | 4.43        | [201]       |
|         | 15-crown-5                             | 29  | 0.255-0.550          | 308.18-313.20    | 0.26549  | 0.97552  | 4.53        | [202]       |
|         | dibenzo-24-crown-8                     | 28  | 0.471-0.574          | 308.18-313.20    | 0.09150  | 0.22837  | 1.6         | [202]       |
|         | cycloheptanone                         | 8   | 0.367-0.491          | 314.15-314.15    | -0.25564 | -0.16238 | 1.58        | [203]       |
|         | cyclononanone                          | 8   | 0.367-0.491          | 314.15-314.15    | -0.18683 | -0.06842 | 2.21        | [203]       |
|         | cyclopentanone                         | 8   | 0.367-0.491          | 314.15-314.15    | -0.00714 | 0.31969  | 0.9         | [203]       |
|         | <i>n</i> -decane                       | 5   | 0.442-0.497          | 299.15-308.15    | -0.31529 | -0.67361 | 1.63        | [204]       |
|         | dibenzyl ether                         | 15  | 0.363-0.565          | 313.16-333.16    | 0.29618  | 1.65277  | 1.63        | [34]        |
|         | 1,2-dichlorobenzene                    | 15  | 0.363-0.565          | 313.00-333.00    | 0.29190  | 1.58648  | 0.81        | [187]       |
|         | 1,3-dichlorobenzene                    | 4   | 0.472-0.527          | 313.15-313.15    | -0.35663 | -0.36790 | 1.07        | [196]       |

| Solvent | Solute                        | NDP | $\rho_{n,1}^*$ range | $T$ range<br>(K) | $k_{12}$ | $B_{12}$ | AARD<br>(%) | Data source   |
|---------|-------------------------------|-----|----------------------|------------------|----------|----------|-------------|---------------|
|         | <i>p</i> -dichlorobenzene     | 13  | 0.324-0.532          | 298.15-318.15    | 0.20814  | 1.09424  | 3.27        | [181]         |
|         | diethyl ether                 | 17  | 0.117-0.482          | 313.15-333.15    | 0.69641  | 18.14313 | 9.65        | [184,185,205] |
|         | 1,2-diethylbenzene            | 15  | 0.363-0.565          | 313.16-333.16    | 0.22735  | 1.07764  | 1.69        | [206]         |
|         | 1,4-diethylbenzene            | 15  | 0.363-0.565          | 313.16-333.16    | 0.05375  | 0.30396  | 2.39        | [206]         |
|         | diisopropyl ether             | 15  | 0.117-0.482          | 313.15-333.15    | 0.72561  | 19.64632 | 7.39        | [205]         |
|         | 2,3-dimethylaniline           | 15  | 0.363-0.565          | 313.00-333.00    | 0.06943  | 0.63108  | 2.17        | [207]         |
|         | 2,6-dimethylaniline           | 15  | 0.363-0.565          | 313.00-333.00    | 0.27891  | 1.69492  | 1.93        | [207]         |
|         | 1,1'-dimethylferrocene        | 68  | 0.233-0.589          | 308.15-323.15    | 0.05949  | 0.57610  | 2.32        | [208]         |
|         | 2,3-dimethylnaphthalene       | 3   | 0.429-0.521          | 308.20-308.20    | 0.13116  | 0.50696  | 0.92        | [209]         |
|         | 2,6-dimethylnaphthalene       | 6   | 0.405-0.522          | 308.20-308.20    | 0.22069  | 0.87406  | 3.71        | [209,210]     |
|         | 2,7-dimethylnaphthalene       | 6   | 0.445-0.524          | 308.20-308.20    | 0.14828  | 0.60017  | 4.32        | [209,210]     |
|         | 2,4-dimethylphenol            | 15  | 0.363-0.565          | 313.00-333.00    | 0.30169  | 1.87922  | 1.95        | [166]         |
|         | diolin                        | 9   | 0.380-0.531          | 313.21-313.21    | 0.40597  | 1.56624  | 1.46        | [211]         |
|         | disperse blue 14              | 47  | 0.496-0.561          | 310.00-320.00    | 0.32475  | 0.96539  | 2.42        | [37]          |
|         | disperse orange 11            | 65  | 0.474-0.577          | 308.20-328.20    | 0.05402  | 0.05804  | 3.41        | [37]          |
|         | 1,3-divinylbenzene            | 15  | 0.363-0.565          | 313.16-333.16    | 0.18206  | 0.84320  | 1.19        | [164]         |
|         | docosahexaenoic acid<br>(DHA) | 63  | 0.340-0.563          | 308.15-343.15    | 0.19423  | 0.79944  | 2.03        | [212]         |
|         | DHA ethyl ester               | 65  | 0.299-0.514          | 308.00-338.15    | 0.13539  | 0.41781  | 1.58        | [169,170]     |
|         | DHA methyl ester              | 17  | 0.361-0.514          | 308.00-318.00    | 0.08781  | 0.26123  | 0.71        | [170]         |
|         | <i>n</i> -dodecane            | 5   | 0.442-0.497          | 299.15-308.15    | -0.50174 | -0.76576 | 3.16        | [204]         |
|         | eicosapentaenoic acid (EPA)   | 55  | 0.323-0.553          | 308.15-343.15    | 0.27696  | 1.01661  | 2.33        | [212]         |
|         | EPA ethyl ester               | 48  | 0.299-0.514          | 308.15-338.15    | 0.08947  | 0.26949  | 0.92        | [169]         |
|         | EPA methyl ester              | 17  | 0.361-0.514          | 308.00-318.00    | 0.03397  | 0.12162  | 0.44        | [170]         |
|         | ethanol                       | 24  | 0.350-0.531          | 313.21-313.21    | 0.24065  | 1.46890  | 2.71        | [179]         |
|         | ethyl acetate                 | 16  | 0.129-0.489          | 308.00-328.00    | 0.71495  | 19.67313 | 13.58       | [185,190]     |



| Solvent | Solute                              | NDP | $\rho_{n,1}^*$ range | $T$ range<br>(K) | $k_{12}$ | $B_{12}$ | AARD<br>(%) | Data source |
|---------|-------------------------------------|-----|----------------------|------------------|----------|----------|-------------|-------------|
|         | ethyl benzoate                      | 15  | 0.363-0.565          | 313.16-333.16    | -0.27764 | -0.34732 | 2.47        | [182]       |
|         | ethylbenzene                        | 15  | 0.363-0.565          | 313.15-333.15    | 0.09391  | 0.40509  | 1.54        | [173]       |
|         | 2-ethyltoluene                      | 15  | 0.363-0.541          | 313.00-333.00    | 0.36063  | 2.22456  | 2.92        | [213]       |
|         | 3-ethyltoluene                      | 15  | 0.363-0.541          | 313.00-333.00    | 0.36568  | 2.22371  | 3.35        | [213]       |
|         | 4-ethyltoluene                      | 15  | 0.363-0.541          | 313.00-333.00    | 0.23924  | 1.27471  | 2.45        | [213]       |
|         | eugenol                             | 15  | 0.363-0.565          | 313.16-333.16    | -0.11487 | 0.08537  | 2.41        | [182]       |
|         | ferrocene                           | 107 | 0.170-0.589          | 308.15-333.15    | 0.05896  | 0.42455  | 3.45        | [208,214]   |
|         | 2-fluoroanisole                     | 15  | 0.363-0.565          | 313.16-333.16    | 0.20150  | 1.31776  | 1.36        | [164]       |
|         | fluorobenzene                       | 15  | 0.363-0.541          | 313.00-333.00    | 0.10752  | 0.82282  | 3.43        | [183]       |
|         | 3-fluorophenol                      | 4   | 0.472-0.527          | 313.15-313.15    | -0.39353 | -0.41416 | 0.99        | [196]       |
|         | geraniol                            | 4   | 0.472-0.527          | 313.15-313.15    | -0.38600 | -0.42141 | 0.34        | [196]       |
|         | <i>n</i> -heptane                   | 5   | 0.442-0.497          | 299.15-308.15    | -0.60907 | -0.88892 | 1.34        | [204]       |
|         | 2-heptanone                         | 11  | 0.386-0.490          | 314.45-314.45    | -0.17692 | -0.49695 | 1.69        | [163]       |
|         | 4-heptanone                         | 9   | 0.376-0.479          | 313.45-313.45    | 0.05115  | -0.21195 | 0.46        | [163]       |
|         | hexachlorobenzene                   | 14  | 0.244-0.545          | 308.00-328.00    | 0.75931  | 16.95813 | 4.59        | [215]       |
|         | 1-hexadecene                        | 11  | 0.254-0.550          | 313.15-373.15    | 0.57283  | 5.75186  | 9.57        | [216]       |
|         | 1,1,1,5,5,5-hexafluoroacetylacetone | 15  | 0.342-0.530          | 308.15-318.15    | 0.15376  | 1.09740  | 3.96        | [201]       |
|         | <i>n</i> -hexane                    | 5   | 0.442-0.497          | 299.15-308.15    | -0.20484 | -0.52061 | 2.17        | [204]       |
|         | ibuprofen                           | 99  | 0.260-0.588          | 308.00-353.15    | 0.19035  | 0.70041  | 2.87        | [38]        |
|         | iodobenzene                         | 20  | 0.363-0.565          | 313.00-333.00    | 0.28569  | 1.58290  | 2.42        | [183,184]   |
|         | isobutylbenzene                     | 15  | 0.363-0.565          | 313.00-333.00    | 0.05132  | 0.31174  | 1.92        | [13]        |
|         | D-limonene                          | 15  | 0.267-0.509          | 313.15-333.15    | 0.62916  | 7.91043  | 1.94        | [199]       |
|         | linalool                            | 15  | 0.267-0.509          | 313.15-333.15    | 0.24526  | 1.09629  | 3.38        | [171]       |
|         | linoleic acid                       | 71  | 0.331-0.564          | 308.15-343.15    | 0.46216  | 3.15391  | 2.91        | [168]       |
|         | linoleic acid methyl ester          | 20  | 0.443-0.561          | 308.20-328.20    | 0.29058  | 1.13214  | 1.31        | [152,217]   |

| Solvent | Solute                                | NDP | $\rho_{n,1}^*$ range | $T$ range<br>(K) | $k_{12}$ | $B_{12}$ | AARD<br>(%) | Data source           |
|---------|---------------------------------------|-----|----------------------|------------------|----------|----------|-------------|-----------------------|
|         | $\alpha$ -linolenic acid              | 56  | 0.324-0.563          | 308.15-343.15    | 0.39721  | 2.11541  | 2.07        | [212]                 |
|         | $\gamma$ -linolenic acid              | 142 | 0.272-0.551          | 308.15-343.15    | 0.42537  | 2.18606  | 3.32        | [218]                 |
|         | $\gamma$ -linolenic acid ethyl ester  | 41  | 0.203-0.480          | 313.21-343.15    | 0.77314  | 19.15240 | 4.6         | [218]                 |
|         | $\gamma$ -linolenic acid methyl ester | 52  | 0.175-0.561          | 313.15-343.15    | 0.35971  | 1.59980  | 4.75        | [217,218]             |
|         | L-menthone                            | 23  | 0.388-0.563          | 308.15-338.15    | -0.21905 | -0.29426 | 3.01        | [197]                 |
|         | methanol                              | 10  | 0.350-0.513          | 313.21-313.21    | 0.61329  | 10.32000 | 2.02        | [179]                 |
|         | 2-methylanisole                       | 15  | 0.363-0.565          | 313.00-333.00    | 0.21276  | 1.30032  | 1.99        | [207]                 |
|         | 4-methylanisole                       | 15  | 0.363-0.565          | 313.00-333.00    | -0.01878 | 0.36370  | 1.83        | [207]                 |
|         | 3-methylbutylbenzene                  | 15  | 0.363-0.565          | 313.00-333.00    | 0.12978  | 0.58633  | 2.23        | [13]                  |
|         | 1-methylnaphthalene                   | 11  | 0.254-0.550          | 313.15-373.15    | 0.42515  | 3.26990  | 8.65        | [216]                 |
|         | monoolein                             | 11  | 0.380-0.531          | 313.21-313.21    | 0.36267  | 1.66650  | 1.07        | [211]                 |
|         | myristic acid ethyl ester             | 16  | 0.361-0.514          | 308.00-318.00    | 0.00538  | 0.07254  | 1.97        | [188,189]             |
|         | myristoleic acid                      | 42  | 0.273-0.531          | 313.21-343.15    | 0.63627  | 7.83845  | 3.35        | [219]                 |
|         | myristoleic acid methyl ester         | 81  | 0.134-0.531          | 313.15-343.15    | 0.71596  | 13.43995 | 6.83        | [219,220]             |
|         | naphthalene                           | 114 | 0.133-0.673          | 288.25-333.15    | 0.38811  | 2.00230  | 9.13        | [158,192,209,214,221] |
|         | 1-naphthol                            | 11  | 0.319-0.495          | 308.00-318.00    | -0.09672 | -0.11272 | 0.54        | [167]                 |
|         | 2-naphthol                            | 16  | 0.197-0.487          | 308.00-328.00    | -0.13286 | -0.16679 | 0.86        | [167]                 |
|         | 2-nitroanisole                        | 15  | 0.363-0.565          | 313.00-333.00    | 0.19354  | 1.06652  | 1.43        | [187]                 |
|         | nitrobenzene                          | 23  | 0.363-0.565          | 313.00-333.00    | 0.14108  | 0.76353  | 1.79        | [166,184]             |
|         | 3-nitrotoluene                        | 15  | 0.363-0.565          | 313.00-333.00    | 0.13683  | 0.62982  | 2.18        | [207]                 |
|         | <i>n</i> -nonane                      | 5   | 0.442-0.497          | 299.15-308.15    | -0.56541 | -0.83493 | 1.67        | [204]                 |
|         | 2-nonanone                            | 10  | 0.362-0.466          | 314.45-314.45    | 0.04378  | -0.17274 | 2.29        | [163]                 |
|         | 5-nonanone                            | 12  | 0.362-0.490          | 314.45-314.45    | -0.09396 | -0.38512 | 1.02        | [163]                 |
|         | <i>n</i> -octane                      | 5   | 0.442-0.497          | 299.15-308.15    | -0.68972 | -0.90856 | 1.91        | [204]                 |
|         | oleic acid                            | 19  | 0.346-0.550          | 313.21-313.21    | 0.45886  | 3.09689  | 1.75        | [211]                 |

| Solvent | Solute                              | NDP | $\rho_{n,1}^*$ range | $T$ range<br>(K) | $k_{12}$ | $B_{12}$ | AARD<br>(%) | Data source       |
|---------|-------------------------------------|-----|----------------------|------------------|----------|----------|-------------|-------------------|
|         | oleic acid ethyl ester              | 5   | 0.228-0.413          | 313.21-313.21    | 0.77251  | 18.42052 | 2.96        | [211]             |
|         | oleic acid methyl ester             | 21  | 0.168-0.481          | 313.00-313.21    | 0.84556  | 42.88455 | 4.86        | [211,217,222]     |
|         | palladium(II)<br>acetylacetonate    | 125 | 0.337-0.589          | 308.15-343.15    | 0.16111  | 1.11905  | 2           | [200]             |
|         | palmitic acid ethyl ester           | 17  | 0.361-0.514          | 308.00-318.00    | 0.03578  | 0.15239  | 0.62        | [155]             |
|         | <i>n</i> -pentane                   | 5   | 0.442-0.497          | 299.15-308.15    | -0.57435 | -0.89519 | 2.15        | [204]             |
|         | 2-pentanone                         | 23  | 0.335-0.547          | 308.15-314.50    | 0.13964  | 0.66390  | 1.83        | [159]             |
|         | 3-pentanone                         | 46  | 0.355-0.575          | 308.15-328.15    | 0.16380  | 0.69224  | 1.92        | [159,203]         |
|         | 2,4-dimethyl-3-pentanone            | 8   | 0.367-0.491          | 314.15-314.15    | -0.15013 | -0.03387 | 2.21        | [163]             |
|         | 2,2,4,4-tetramethyl-3-<br>pentanone | 9   | 0.376-0.479          | 313.45-313.45    | -0.07791 | -0.31737 | 0.7         | [203]             |
|         | <i>n</i> -pentylbenzene             | 31  | 0.363-0.577          | 308.00-398.00    | 0.12451  | 0.55848  | 2.09        | [186]             |
|         | phenanthrene                        | 25  | 0.303-0.555          | 303.15-333.15    | 0.68318  | 8.51016  | 3.61        | [158,162,215]     |
|         | phenol                              | 109 | 0.213-0.564          | 308.00-328.15    | 0.18750  | 1.03686  | 2.52        | [160,190,194,195] |
|         | phenylacetic acid                   | 16  | 0.361-0.514          | 308.15-318.15    | 0.04211  | 0.30396  | 1.42        | [223]             |
|         | phenylacetylene                     | 15  | 0.363-0.565          | 313.16-333.16    | 0.19979  | 1.12486  | 1.13        | [206]             |
|         | phenylbutazone                      | 78  | 0.268-0.588          | 308.15-343.15    | 0.40882  | 2.13045  | 2.74        | [40]              |
|         | 1-phenyldodecane                    | 15  | 0.363-0.565          | 313.00-333.00    | 0.17453  | 0.78508  | 1.93        | [186]             |
|         | 1-phenylethanol                     | 15  | 0.363-0.565          | 313.16-333.16    | 0.15686  | 0.92580  | 1.32        | [224]             |
|         | 2-phenylethanol                     | 15  | 0.363-0.565          | 313.16-333.16    | 0.19175  | 1.14300  | 1.42        | [224]             |
|         | 2-phenylethyl acetate               | 15  | 0.363-0.565          | 313.16-333.16    | 0.27775  | 1.67787  | 1.38        | [34]              |
|         | 1-phenylhexane                      | 15  | 0.363-0.565          | 313.00-333.00    | 0.18119  | 0.79322  | 1.89        | [186]             |
|         | phenylmethanol                      | 15  | 0.363-0.565          | 313.16-333.16    | 0.07781  | 0.56424  | 1.55        | [224]             |
|         | 1-phenyloctane                      | 15  | 0.363-0.565          | 313.00-333.00    | 0.29436  | 1.42529  | 2.08        | [186]             |
|         | 3-phenylpropyl acetate              | 15  | 0.363-0.565          | 313.16-333.16    | 0.44389  | 3.60577  | 1.34        | [34]              |
|         | $\alpha$ -pinene                    | 30  | 0.267-0.541          | 313.15-333.15    | -0.02249 | 0.07574  | 3.04        | [225,226]         |

| Solvent | Solute                   | NDP | $\rho_{n,1}^*$ range | $T$ range<br>(K) | $k_{12}$ | $B_{12}$ | AARD<br>(%) | Data source       |
|---------|--------------------------|-----|----------------------|------------------|----------|----------|-------------|-------------------|
|         | $\beta$ -pinene          | 15  | 0.267-0.509          | 313.15-333.15    | 0.30695  | 1.36877  | 2.96        | [225]             |
|         | 1-propanol               | 17  | 0.350-0.480          | 313.21-313.21    | 0.72212  | 19.63428 | 2.84        | [179]             |
|         | 2-phenyl-1-propanol      | 15  | 0.363-0.565          | 313.16-333.16    | 0.20514  | 1.25963  | 1.51        | [224]             |
|         | 2-propanol               | 18  | 0.350-0.488          | 313.21-313.21    | 0.76258  | 27.26173 | 2.2         | [179]             |
|         | 3-phenyl-1-propanol      | 15  | 0.363-0.565          | 313.16-333.16    | -0.01099 | 0.22401  | 1.6         | [224]             |
|         | <i>i</i> -propylbenzene  | 36  | 0.303-0.565          | 313.15-333.15    | 0.18942  | 0.83024  | 2.24        | [158,173,185,227] |
|         | <i>n</i> -propylbenzene  | 60  | 0.216-0.565          | 308.15-333.15    | 0.57874  | 6.40360  | 4.5         | [172,173,185,227] |
|         | pyrene                   | 21  | 0.233-0.563          | 303.15-333.15    | 0.00977  | 0.10193  | 2.03        | [158,167]         |
|         | squalene                 | 5   | 0.442-0.490          | 314.45-314.45    | -0.21802 | -0.42379 | 1.74        | [163]             |
|         | stearic acid             | 4   | 0.447-0.479          | 313.50-313.50    | 0.12914  | -0.16980 | 0.38        | [163]             |
|         | stearic acid ethyl ester | 17  | 0.361-0.514          | 308.00-318.00    | 0.09804  | 0.21940  | 0.67        | [170]             |
|         | styrene                  | 15  | 0.363-0.541          | 313.16-333.16    | 0.20429  | 1.23722  | 3.85        | [165]             |
|         | <i>n</i> -tetradecane    | 5   | 0.442-0.497          | 299.15-308.15    | -0.59534 | -0.76334 | 3.23        | [204]             |
|         | tetrahydrofuran          | 15  | 0.117-0.482          | 313.15-333.15    | 0.83293  | 57.62331 | 8.78        | [205]             |
|         | thenoyltrifluoroacetone  | 15  | 0.342-0.535          | 308.15-318.15    | 0.02762  | 0.54036  | 3.15        | [201]             |
|         | $\alpha$ -tocopherol     | 82  | 0.372-0.564          | 308.15-333.15    | 0.36960  | 1.31453  | 0.88        | [193–195]         |
|         | toluene                  | 41  | 0.129-0.565          | 306.12-333.15    | 0.23069  | 1.22904  | 9.72        | [173,176,190]     |
|         | triarachidonin           | 27  | 0.377-0.550          | 313.21-313.21    | 0.61908  | 4.16419  | 0.71        | [228]             |
|         | trierucin                | 101 | 0.342-0.563          | 308.15-323.15    | 0.80342  | 17.06793 | 1.88        | [228]             |
|         | trifluoroacetylacetone   | 15  | 0.349-0.531          | 308.15-318.15    | 0.08009  | 0.47331  | 1.59        | [201]             |
|         | 1,3,5-trimethylbenzene   | 34  | 0.351-0.565          | 303.15-333.16    | 0.37061  | 2.42310  | 3.82        | [158,165,172,184] |
|         | trinervonin              | 38  | 0.359-0.563          | 308.15-323.15    | 0.72743  | 8.27233  | 1.85        | [228]             |
|         | triolein                 | 14  | 0.312-0.574          | 298.10-313.21    | 0.59231  | 2.70604  | 2.04        | [180,228]         |
|         | ubiquinone CoQ10         | 80  | 0.372-0.563          | 308.15-333.15    | 0.44028  | 1.64757  | 1.57        | [195,229]         |
|         | <i>n</i> -undecane       | 5   | 0.442-0.497          | 299.15-308.15    | -0.37897 | -0.71665 | 2.04        | [204]             |
|         | 6-undecanone             | 13  | 0.362-0.490          | 314.45-314.45    | -0.01004 | -0.24598 | 2.16        | [163]             |

| Solvent | Solute                                  | NDP | $\rho_{n,1}^*$ range | $T$ range<br>(K) | $k_{12}$ | $B_{12}$ | AARD<br>(%) | Data source   |
|---------|-----------------------------------------|-----|----------------------|------------------|----------|----------|-------------|---------------|
|         | vanillin                                | 15  | 0.361-0.514          | 308.15-318.15    | 0.05824  | 0.43669  | 1.7         | [223]         |
|         | vitamin K <sub>1</sub>                  | 17  | 0.380-0.550          | 313.20-313.20    | 0.40163  | 1.10971  | 2.33        | [202,220]     |
|         | vitamin K <sub>3</sub>                  | 22  | 0.288-0.550          | 313.15-313.15    | 0.38920  | 1.71033  | 2.53        | [152,195,220] |
|         | water                                   | 24  | 0.481-0.625          | 283.15-308.15    | -1.32022 | -1.14870 | 9.97        | [230]         |
|         | 5- <i>tert</i> -butyl- <i>m</i> -xylene | 31  | 0.362-0.577          | 308.16-398.16    | 0.05177  | 0.28237  | 2.12        | [206]         |
|         | <i>m</i> -xylene                        | 12  | 0.111-0.550          | 313.15-373.15    | 0.70874  | 19.04885 | 14.95       | [216]         |
|         | <i>p</i> -xylene                        | 7   | 0.421-0.531          | 313.15-323.15    | 0.06005  | 0.26185  | 3.04        | [184,185]     |

## References

1. Valderrama, J.O.; Rojas, R.E. Critical Properties of Ionic Liquids. Revisited. *Ind. Eng. Chem. Res.* **2009**, *48*, 6890–6900.
2. Joback, K.G.; Reid, R.C. A Unified Approach to Physical Property Estimation Using Multivariate Statistical Techniques, Massachusetts Institute of Technology: Cambridge, MA, 1984.
3. Joback, K.G.; Reid, R.C. Estimation of Pure-Component Properties from Group-Contributions. *Chem. Eng. Commun.* **1987**, *57*, 233–243.
4. Poling, B.E.; Prausnitz, J.M.; O'Connell, J.P. *The Properties of Gases and Liquids*; Company, M.-H.B., Ed.; Fifth ed.; The McGraw-Hill Companies, Inc: New York, 2001; ISBN 0071499997.
5. Somayajulu, G.R. Estimation Procedures for Critical Constants. *J. Chem. Eng. Data* **1989**, *34*, 106–120.
6. Yaws, C.L. *Thermophysical Properties of Chemicals and Hydrocarbons*; William Andrew Inc.: New York, 2008;
7. Reid, R.C.; Prausnitz, J.M.; Poling, B.E. *The Properties of Gases and Liquids*; Company, M.-H.B., Ed.; Fourth ed.; McGraw-Hill International Editions: New York, 1987;
8. Nikitin, E.D.; Popov, A.P. Critical Point Measurement of Ferrocene and Some of Its Derivatives. *Fluid Phase Equilib.* **2012**, *324*, 13–16.
9. Magalhães, A.L.; Da Silva, F.A.; Silva, C.M. Free-Volume Model for the Diffusion Coefficients of Solutes at Infinite Dilution in Supercritical CO<sub>2</sub> and Liquid H<sub>2</sub>O. *J. Supercrit. Fluids* **2013**, *74*, 89–104.
10. Klinecicz, K.M.; Reid, R.C. Estimation of Critical Properties with Group Contribution Methods. *AIChE J.* **1984**, *30*, 137–142.
11. Green, D.W.; Perry, R.H. *Perry's Chemical Engineers' Handbook*; 8th ed.; McGraw-Hill Professional: New York, 2008;
12. Wen, X.; Qiang, Y. A New Group Contribution Method for Estimating Critical Properties of Organic Compounds. *Ind. Eng. Chem. Res.* **2001**, *40*, 6245–6250.
13. Pizarro, C.; Suárez-Iglesias, O.; Medina, I.; Bueno, J.L. Diffusion Coefficients of Isobutylbenzene, Sec-Butylbenzene, and 3-Methylbutylbenzene in Supercritical Carbon Dioxide. *J. Chem. Eng. Data* **2013**, *58*, 2001–2007.
14. AIChE Design Institute for Physical Properties (DIPPR) Available online: <http://dippr.byu.edu/> (accessed on 22 August 2020).
15. Liu, H.; Ruckenstein, E. A Predictive Equation for the Tracer Diffusion of Various Solutes in Gases, Supercritical Fluids, and Liquids. *Ind. Eng. Chem. Res.* **1997**, *36*, 5488–5500.
16. Constantinou, L.; Gani, R. New Group Contribution Method for Estimating Properties of Pure Compounds. *AIChE J.* **1994**, *40*, 1697–1710.
17. Molecular Design LAB. (Dept. of Chemical Engineering) Korea Thermophysical Properties Data Bank (KDB) Available online: <http://www.cheric.org/research/kdb/hcprop/cmprsch.php> (accessed on 22 August 2020).
18. Zêzere, B.; Magalhães, A.L.; Portugal, I.; Silva, C.M. Diffusion Coefficients of Eucalyptol at Infinite Dilution in Compressed Liquid Ethanol and in Supercritical CO<sub>2</sub>/Ethanol Mixtures. *J. Supercrit. Fluids* **2018**, *133*, 297–308.
19. Leite, J.; Magalhães, A.L.; Valente, A.A.; Silva, C.M. Measurement and Modelling of Tracer Diffusivities of Gallic Acid in Liquid Ethanol and in Supercritical CO<sub>2</sub> Modified with Ethanol. *J. Supercrit. Fluids* **2018**, *131*, 130–139.
20. Magalhães, A.L.; Da Silva, F.A.; Silva, C.M. New Tracer Diffusion Correlation for Real Systems over Wide Ranges of Temperature and Density. *Chem. Eng. J.* **2011**, *166*, 49–72.
21. Catchpole, O.J.; Von Kamp, J.C. Phase Equilibrium for the Extraction of Squalene from Shark Liver Oil Using Supercritical Carbon Dioxide. *Ind. Eng. Chem. Res.* **1997**, *36*, 3762–3768.
22. Man, C.W. Limiting Mutual Diffusion of Nonassociated Aromatic Solutes, The Hong Kong Polytechnic University: Hong Kong, 2001.
23. Tyn, M.T.; Calus, W.F. Temperature and Concentration Dependence of Mutual Diffusion Coefficients of Some Binary Liquid Systems. *J. Chem. Eng. Data* **1975**, *20*, 310–316.
24. Cooper, E. Diffusion Coefficients at Infinite Dilution in Alcohol Solvents at Temperatures to 348 K and Pressures to 17 MPa, University of Ottawa: Canada, 1992.
25. Wong, C.-F.; Hayduk, W. Molecular Diffusivities for Propene in 1-Butanol, Chlorobenzene, Ethylene Glycol, and n-Octane at Elevated Pressures. *J. Chem. Eng. Data* **1990**, *35*, 323–328.
26. Wong, C.-F. Diffusion Coefficients of Dissolved Gases in Liquids, University of Ottawa: Canada, 1989.
27. Kopner, A.; Hamm, A.; Ellert, J.; Feist, R.; Schneider, G.M. Determination of Binary Diffusion Coefficients in Supercritical Chlorotrifluoromethane and Sulfurhexafluoride with Supercritical Fluid Chromatography (SFC). *Chem. Eng. Sci.* **1987**, *42*, 2213–2218.

28. Han, P.; Bartels, D.M. Temperature Dependence of Oxygen Diffusion in H<sub>2</sub>O and D<sub>2</sub>O. *J. Phys. Chem.* **1996**, *100*, 5597–5602.
29. Okubo, Y.; Kong, C.Y.; Sakabe, J.; Funazukuri, T. Measurements of Infinite Dilution Binary Diffusion Coefficients of Acetylferrocene and 1,1'-Diacylferrocene in Supercritical Carbon Dioxide and in Liquid Organic Solvents. *J. Supercrit. Fluids* **2021**, *177*, 105321.
30. Kong, C.Y.; Watanabe, K.; Funazukuri, T. Determination and Correlation of Infinite Dilution Binary Diffusion Coefficients for Aluminum Acetylacetonate in Supercritical and Liquid Fluids. *Fluid Phase Equilib.* **2015**, *420*, 83–88.
31. Sun, C.K.J.; Chen, S.H. Tracer Diffusion in Dense Ethanol: A Generalized Correlation for Nonpolar and Hydrogen-Bonded Solvents. *AIChE J.* **1986**, *32*, 1367–1371.
32. Tominaga, T.; Matsumoto, S. Diffusion of Polar and Nonpolar Molecules in Water and Ethanol. *Bull. Chem. Soc. Jpn.* **1990**, *63*, 533–537.
33. Lin, I.-H.; Tan, C.-S. Diffusion of Benzonitrile in CO<sub>2</sub> - Expanded Ethanol. *J. Chem. Eng. Data* **2008**, *53*, 1886–1891.
34. Suárez-Iglesias, O.; Medina, I.; Pizarro, C.; Bueno, J.L. Diffusion of Benzyl Acetate, 2-Phenylethyl Acetate, 3-Phenylpropyl Acetate, and Dibenzyl Ether in Mixtures of Carbon Dioxide and Ethanol. *Ind. Eng. Chem. Res.* **2007**, *46*, 3810–3819.
35. Zêzere, B.; Cordeiro, J.; Leite, J.; Magalhães, A.L.; Portugal, I.; Silva, C.M. Diffusivities of Metal Acetylacetonates in Liquid Ethanol and Comparison with the Transport Behavior in Supercritical Systems. *J. Supercrit. Fluids* **2019**, *143*, 259–267.
36. Kong, C.Y.; Watanabe, K.; Funazukuri, T. Measurement and Correlation of the Diffusion Coefficients of Chromium(III) Acetylacetonate at Infinite Dilution in Supercritical Carbon Dioxide and in Liquid Ethanol. *J. Chem. Thermodyn.* **2017**, *105*, 86–93.
37. Funazukuri, T.; Yamasaki, T.; Taguchi, M.; Kong, C.Y. Measurement of Binary Diffusion Coefficient and Solubility Estimation for Dyes in Supercritical Carbon Dioxide by CIR Method. *Fluid Phase Equilib.* **2015**, *420*, 7–13.
38. Kong, C.Y.; Sugiura, K.; Natsume, S.; Sakabe, J.; Funazukuri, T.; Miyake, K.; Okajima, I.; Badhulika, S.; Sako, T. Measurements and Correlation of Diffusion Coefficients of Ibuprofen in Both Liquid and Supercritical Fluids. *J. Supercrit. Fluids* **2020**, *159*, 104776.
39. Snijder, E.D.; te Riele, M.J.M.; Versteeg, G.F.; van Swaaij, W.P.M. Diffusion Coefficients of CO, CO<sub>2</sub>, N<sub>2</sub>O, and N<sub>2</sub> in Ethanol and Toluene. *J. Chem. Eng. Data* **1995**, *40*, 37–39.
40. Kong, C.Y.; Watanabe, K.; Funazukuri, T. Diffusion Coefficients of Phenylbutazone in Supercritical CO<sub>2</sub> and in Ethanol. *J. Chromatogr. A* **2013**, *1279*, 92–97.
41. Zêzere, B.; Iglésias, J.; Portugal, I.; Gomes, J.R.B.; Silva, C.M. Diffusion of Quercetin in Compressed Liquid Ethyl Acetate and Ethanol. *J. Mol. Liq.* **2020**, 114714.
42. Pratt, K.C.; Wakeham, W.A. The Mutual Diffusion Coefficient of Ethanol-Water Mixtures: Determination by a Rapid, New Method. *Proc. R. Soc. London A* **1974**, *336*, 393–406.
43. Zêzere, B.; Silva, J.M.; Portugal, I.; Gomes, J.R.B.; Silva, C.M. Measurement of Astaxanthin and Squalene Diffusivities in Compressed Liquid Ethyl Acetate by Taylor-Aris Dispersion Method. *Sep. Purif. Technol.* **2020**, *234*, 116046.
44. Heintz, A.; Ludwig, R.; Schmidt, E. Limiting Diffusion Coefficients of Ionic Liquids in Water and Methanol: A Combined Experimental and Molecular Dynamics Study. *Phys. Chem. Chem. Phys.* **2011**, *13*, 3268–3273.
45. Sarraute, S.; Gomes, M.F.C.; Pádua, A.A.H. Diffusion Coefficients of 1-Alkyl-3-Methylimidazolium Ionic Liquids in Water, Methanol, and Acetonitrile at Infinite Dilution. *J. Chem. Eng. Data* **2009**, *54*, 2389–2394.
46. Hurle, R.L.; Woolf, L.A. Tracer Diffusion in Methanol and Acetonitrile under Pressure. *J. Chem. Soc. Faraday Trans. 1* **1982**, *78*, 2921–2928.
47. Sun, C.K.J.; Chen, S.H. Tracer Diffusion in Dense Methanol and 2-Propanol up to Supercritical Region: Understanding of Solvent Molecular Association and Development of an Empirical Correlation. *Ind. Eng. Chem. Res.* **1987**, *26*, 815–819.
48. Liu; Takemura, F.; Yabe, A. Solubility and Diffusivity of Carbon Monoxide in Liquid Methanol. *J. Chem. Eng. Data* **1996**, *41*, 589–592.
49. Lin, I.-H.; Tan, C.-S. Measurement of Diffusion Coefficients of P-Chloronitrobenzene in CO<sub>2</sub>-Expanded Methanol. *J. Supercrit. Fluids* **2008**, *46*, 112–117.
50. Funazukuri, T.; Sugihara, T.; Yui, K.; Ishii, T.; Taguchi, M. Measurement of Infinite Dilution Diffusion Coefficients of Vitamin K<sub>3</sub> in CO<sub>2</sub> Expanded Methanol. *J. Supercrit. Fluids* **2016**, *108*, 19–25.
51. Lee, Y.E.; Li, F.Y. Binary Diffusion Coefficients of the Methanol Water System in the Temperature Range 30–40 °C. *J. Chem. Eng. Data* **1991**, *36*, 240–243.

52. Pratt, K.C.; Wakeham, W.A. The Mutual Diffusion Coefficient for Binary Mixtures of Water and the Isomers of Propanol. *Proc. R. Soc. London A* **1975**, *342*, 401–419.
53. Wong, C.-L.; Soriano, A.N.; Li, M.-H. Infinite Dilution Diffusion Coefficients of [Bmim]-Based Ionic Liquids in Water and Its Molar Conductivities. *J. Taiwan Inst. Chem. Eng.* **2009**, *40*, 77–83.
54. Wong, C.-L.; Soriano, A.N.; Li, M.-H. Diffusion Coefficients and Molar Conductivities in Aqueous Solutions of 1-Ethyl-3-Methylimidazolium-Based Ionic Liquids. *Fluid Phase Equilib.* **2008**, *271*, 43–52.
55. Heintz, A.; Lehmann, J.K.; Schmidt, E.; Wandschneider, A. Diffusion Coefficients of Imidazolium Based Ionic Liquids in Aqueous Solutions. *J. Solution Chem.* **2009**, *38*, 1079–1083.
56. Gary-Bobo, C.; Weber, H.W. Diffusion of Alcohols and Amides in Water from 4 to 37.Deg. *J. Phys. Chem.* **1969**, *73*, 1155–1156.
57. Umecky, T.; Kuga, T.; Funazukuri, T. Infinite Dilution Binary Diffusion Coefficients of Several  $\alpha$ -Amino Acids in Water over a Temperature Range from (293.2 to 333.2) K with the Taylor Dispersion Technique. *J. Chem. Eng. Data* **2006**, *51*, 1705–1710.
58. Umecky, T.; Omori, S.; Kuga, T.; Funazukuri, T. Effects of Hydroxyl Groups on Binary Diffusion Coefficients of  $\alpha$ -Amino Acids in Dilute Aqueous Solutions. *Fluid Phase Equilib.* **2008**, *264*, 18–22.
59. Frank, M.J.W.; Kuipers, J.A.M.; van Swaaij, W.P.M. Diffusion Coefficients and Viscosities of CO<sub>2</sub>+H<sub>2</sub>O, CO<sub>2</sub>+CH<sub>3</sub>OH, NH<sub>3</sub>+H<sub>2</sub>O, and NH<sub>3</sub>+CH<sub>3</sub>OH Liquid Mixtures. *J. Chem. Eng. Data* **1996**, *41*, 297–302.
60. Mogi, N.; Sugai, E.; Fuse, Y.; Funazukuri, T. Infinite Dilution Binary Diffusion Coefficients for Six Sugars at 0.1 MPa and Temperatures from (273.2 to 353.2) K. *J. Chem. Eng. Data* **2007**, *52*, 40–43.
61. Maharajh, D. Solubility and Diffusion of Gases in Water, Simon Fraser University: British Columbia, 1975.
62. Witherspoon, P.A.; Bonoli, L. Correlation of Diffusion Coefficients for Paraffin, Aromatic, and Cycloparaffin Hydrocarbons in Water. *Ind. Eng. Chem. Fundam.* **1969**, *8*, 589–591.
63. Bonoli, L.; Witherspoon, P.A. Diffusion of Aromatic and Cycloparaffin Hydrocarbons in Water from 2 to 60.Deg. *J. Phys. Chem.* **1968**, *72*, 2532–2534.
64. Tominaga, T.; Yamamoto, S.; Takanaka, J.-I. Limiting Interdiffusion Coefficients of Benzene, Toluene, Ethylbenzene and Hexafluorobenzene in Water from 298 to 368 K. *J. Chem. Soc. Faraday Trans. 1 Phys. Chem. Condens. Phases* **1984**, *80*, 941.
65. Tominaga, T.; Matsumoto, S.; Ishii, T. Limiting Interdiffusion of Some Aromatic Hydrocarbons in Water from 265 to 433 K. *J. Phys. Chem.* **1986**, *90*, 139–143.
66. Delgado, J.M.P.Q. Molecular Diffusion Coefficients of Organic Compounds in Water at Different Temperatures. *J. Phase Equilibria Diffus.* **2007**, *28*, 427–432.
67. Mutoru, J.W.; Leahy-Dios, A.; Firoozabadi, A. Modeling Infinite Dilution and Fickian Diffusion Coefficients of Carbon Dioxide in Water. *AIChE J.* **2011**, *57*, 1617–1627.
68. Jähne, B.; Heinz, G.; Dietrich, W. Measurement of the Diffusion Coefficients of Sparingly Soluble Gases in Water. *J. Geophys. Res.* **1987**, *92*, 10767–10776.
69. Riele, M.J.M.T.; Snijder, E.D.; van Swaaij, W.P.M. Diffusion Coefficients at Infinite Dilution in Water and in N-Methylpyrrolidone. *J. Chem. Eng. Data* **1995**, *40*, 34–36.
70. Li, S.F.Y.; Ong, H.M. Infinite Dilution Diffusion Coefficients of Several Alcohols in Water. *J. Chem. Eng. Data* **1990**, *35*, 136–137.
71. Tominaga, T.; Matsumoto, S. Limiting Interdiffusion Coefficients of Some Hydroxylic Compounds in Water from 265 to 433 K. *J. Chem. Eng. Data* **1990**, *35*, 45–47.
72. Funazukuri, T.; Nishio, M. Infinite Dilution Binary Diffusion Coefficients of C5-Monoalcohols in Water in the Temperature Range from 273.2 K to 353.2 K at 0.1 MPa. *J. Chem. Eng. Data* **1999**, *44*, 73–76.
73. Price, W.E.; Trickett, K.A.; Harris, K.R. Association of Caffeine in Aqueous Solution. Effects on Caffeine Intradiffusion. *J. Chem. Soc. Faraday Trans. 1* **1989**, *85*, 3281–3288.
74. Price, W.E. Tracer Caffeine Diffusion in Aqueous Solutions at 298 K. The Effect of Caffeine Self-Association. *J. Chem. Soc. Faraday Trans. 1* **1989**, *85*, 415–419.
75. Niesner, R.; Heintz, A. Diffusion Coefficients of Aromatics in Aqueous Solution. *J. Chem. Eng. Data* **2000**, *45*, 1121–1124.
76. Vivian, J.E.; King, C.J. Diffusivities of Slightly Soluble Gases in Water. *AIChE J.* **1964**, *10*, 220–221.
77. Ng, W.Y.; Walkley, J. Diffusion of Gases in Liquids: The Constant Size Bubble Method. *Can. J. Chem.* **1969**, *47*, 1075–1077.
78. Maharajh, D.M.; Walkley, D.J. The Temperature Dependence of the Diffusion Coefficients of Ar, CO<sub>2</sub>, CH<sub>4</sub>, CH<sub>3</sub>Cl, CH<sub>3</sub>Br, and CHCl<sub>3</sub> in Water. *Can. J. Chem.* **1973**, *51*, 944–952.
79. Pratt, K.C.; Slater, D.H.; Wakeham, W.A. A Rapid Method for the Determination of Diffusion Coefficients of Gases in Liquids. *Chem. Eng. Sci.* **1973**, *28*, 1901–1903.
80. Bodnar, L.H.; Himmelblau, D.M. Continuous Measurement of Diffusion Coefficients of Gases in Liquids Using Glass Scintillators. *Int. J. Appl. Radiat. Isot.* **1962**, *13*, 1–6.



81. Woods, D.R. Mass Transfer Between a Liquid Jet and a Countercurrent Gas Stream, University of Wisconsin-Madison: Wisconsin, 1961.
82. Ferrell, R.T.; Himmelblau, D.M. Diffusion Coefficients of Nitrogen and Oxygen in Water. *J. Chem. Eng. Data* **1967**, *12*, 111–115.
83. Thomas, W.J.; Adams, M.J. Measurement of the Diffusion Coefficients of Carbon Dioxide and Nitrous Oxide in Water and Aqueous Solutions of Glycerol. *Trans. Faraday Soc.* **1965**, *61*, 668–673.
84. Tham, M.J.; Bhatia, K.K.; Gubbins, K.F. Steady-State Method for Studying Diffusion of Gases in Liquids. *Chem. Eng. Sci.* **1967**, *22*, 309–311.
85. Sovová, H.; Procházka, J. A New Method of Measurement of Diffusivities of Gases in Liquids. *Chem. Eng. Sci.* **1976**, *31*, 1091–1097.
86. Himmelblau, D.M. Diffusion of Dissolved Gases in Liquids. *Chem. Rev.* **1964**, *64*, 527–550.
87. Peaceman, D.W. Liquid-Side Resistance in Gas Absorption with and without Chemical Reaction, Massachusetts Institute of Technology: Massachusetts, 1952.
88. Ringbom, A. Über Die Bestimmung Der Diffusionskoeffizienten von Gasen in Flüssigkeiten. *Zeitschrift für Anorg. und Allg. Chemie* **1938**, *238*, 94–102.
89. Norman, W.S.; Sammak, F.Y.Y. Gas Absorption in a Packed Column - Part I: The Effect of Liquid Viscosity on the Mass Transfer Coefficient. *Trans. Inst. Chem. Eng.* **1963**, *41*, 109–116.
90. Onda, K.; Okamoto, T.; Yamaji, Y. Measurement of the Diffusivities of CO<sub>2</sub> in Liquids by Liquid Jets. *Kagaku Kogaku* **1960**, *24*, 918–925.
91. Nijssing, R.A.T.O.; Hendriks, R.H.; Kramers, H. Absorption of CO<sub>2</sub> in Jets and Falling Films of Electrolyte Solutions, with and without Chemical Reaction. *Chem. Eng. Sci.* **1959**, *10*, 88–104.
92. Hüfner, G. Ueber Die Bestimmung Der Diffusions Coefficienten Einiger Gase Für Wasser. *Ann. Phys.* **1896**, *296*, 134–168.
93. Stefan, J. Über Die Diffusion Der Kohlensäure Durch Wasser Und Alkohol. *Sitzungsberichte der Kais. Akad. der Wissenschaften, Math. Klasse, II Abtheilung* **1878**, *77*, 371–409.
94. Tammann, G.; Jessen, V. Über Die Diffusionskoeffizienten von Gasen in Wasser Und Ihre Temperaturabhängigkeit. *Zeitschrift für Anorg. und Allg. Chemie* **1929**, *179*, 125–144.
95. Tamimi, A.; Rinker, E.B.; Sandall, O.C. Diffusion Coefficients for Hydrogen Sulfide, Carbon Dioxide, and Nitrous Oxide in Water over the Temperature Range 293–368 K. *J. Chem. Eng. Data* **1994**, *39*, 330–332.
96. Versteeg, G.F.; Van Swaaij, W.P.M. Solubility and Diffusivity of Acid Gases (Carbon Dioxide, Nitrous Oxide) in Aqueous Alkanolamine Solutions. *J. Chem. Eng. Data* **1988**, *33*, 29–34.
97. Cadogan, S.P.; Maitland, G.C.; Trusler, J.P.M. Diffusion Coefficients of CO<sub>2</sub> and N<sub>2</sub> in Water at Temperatures between 298.15 K and 423.15 K at Pressures up to 45 MPa. *J. Chem. Eng. Data* **2014**, *59*, 519–525.
98. Mazarei, A.F.; Sandall, O.C. Diffusion Coefficients for Helium, Hydrogen, and Carbon Dioxide in Water at 25°C. *AIChE J.* **1980**, *26*, 154–157.
99. Ribeiro, A.C.F.; Valente, A.J.M.; Santos, C.I.A. V; Prazeres, P.M.R.A.; Lobo, V.M.M.; Burrows, H.D.; Estes, M.A.; Cabral, A.M.T.D.P. V; Veiga, F.J.B. Binary Mutual Diffusion Coefficients of Aqueous Solutions of  $\alpha$ -Cyclodextrin, 2-Hydroxypropyl- $\alpha$ -Cyclodextrin, and 2-Hydroxypropyl- $\beta$ -Cyclodextrin at Temperatures from (298.15 to 312.15) K. *J. Chem. Eng. Data* **2007**, *52*, 586–590.
100. Ribeiro, A.C.F.; Leaist, D.G.; Estes, M.A.; Lobo, V.M.M.; Valente, A.J.M.; Santos, C.I.A. V; Cabral, A.M.T.D.P. V; Veiga, F.J.B. Binary Mutual Diffusion Coefficients of Aqueous Solutions of  $\beta$ -Cyclodextrin at Temperatures from 298.15 to 312.15 K. *J. Chem. Eng. Data* **2006**, *51*, 1368–1371.
101. Snijder, E.D.; te Riele, M.J.M.; Versteeg, G.F.; van Swaaij, W.P.M. Diffusion Coefficients of Several Aqueous Alkanolamine Solutions. *J. Chem. Eng. Data* **1993**, *38*, 475–480.
102. Wang, M.H.; Soriano, A.N.; Caparanga, A.R.; Li, M.-H. Mutual Diffusion Coefficients of Aqueous Solutions of Some Glycols. *Fluid Phase Equilib.* **2009**, *285*, 44–49.
103. Secuianu, C.; Maitland, G.C.; Trusler, J.P.M.; Wakeham, W.A. Mutual Diffusion Coefficients of Aqueous KCl at High Pressures Measured by the Taylor Dispersion Method. *J. Chem. Eng. Data* **2011**, *56*, 4840–4848.
104. Kuo, C.-C.; Li, M.-H. Measurements of Mutual Diffusion Coefficients of Binary Systems: Aqueous N,N-Diethylethanolamine, N,N-Dimethylethanolamine, Monoisopropanolamine, Piperazine, and Sulfolane Solutions, Chung Yuan Christian University : Jhongli, 2005, Vol. Master.
105. Chang, L.-C.; Lin, T.-I.; Li, M.-H. Mutual Diffusion Coefficients of Some Aqueous Alkanolamines Solutions. *J. Chem. Eng. Data* **2005**, *50*, 77–84.
106. Wang, M.H.; Soriano, A.N.; Caparanga, A.R.; Li, M.-H. Binary Mutual Diffusion Coefficient of Aqueous Solutions of Propylene Glycol and Dipropylene Glycol. *J. Taiwan Inst. Chem. Eng.* **2010**, *41*, 279–285.

107. Kuo, C.-C.; Li, M.H. Diffusion Coefficients of Aqueous N,N-Diethylethanolamine, N,N-Dimethylethanolamine, Monoisopropanolamine, Piperazine, and Sulfolane Solutions. *J. Chinese Inst. Chem. Eng.* **2006**, *37*, 341–353.
108. Witherspoon, P.A.; Saraf, D.N. Diffusion of Methane, Ethane, Propane and n-Butane in Water from 25 to 43°. *J. Phys. Chem.* **1965**, *69*, 3752–3755.
109. Ribeiro, A.C.F.; Ortona, O.; Simões, S.M.N.; Santos, C.I.A. V; Prazeres, P.M.R.A.; Valente, A.J.M.; Lobo, V.M.M.; Burrows, H.D. Binary Mutual Diffusion Coefficients of Aqueous Solutions of Sucrose, Lactose, Glucose, and Fructose in the Temperature Range from (298.15 to 328.15) K. *J. Chem. Eng. Data* **2006**, *51*, 1836–1840.
110. Yui, K.; Yamazaki, N.; Funazukuri, T. Infinite Dilution Binary Diffusion Coefficients for Compounds Derived from Biomass in Water at 0.1 MPa and Temperatures from (298.2 to 353.2) K. *J. Chem. Eng. Data* **2013**, *58*, 183–186.
111. Boerboom, A.J.; Kleyn, G. Diffusion Coefficients of Noble Gases in Water. *J. Chem. Phys.* **1969**, *50*, 1086–1088.
112. Haimour, N.; Sandall, O.C. Molecular Diffusivity of Hydrogen Sulfide in Water. *J. Chem. Eng. Data* **1984**, *29*, 20–22.
113. Derlacki, Z.J.; Easteal, A.J.; Edge, A.V.J.; Woolf, L.A.; Roksandic, Z. Diffusion Coefficients of Methanol and Water and the Mutual Diffusion Coefficient in Methanol-Water Solutions at 278 and 298 K. *J. Phys. Chem.* **1985**, *89*, 5318–5322.
114. Matthews, M.A.; Akgerman, A. Infinite Dilution Diffusion Coefficients of Methanol and 2-Propanol in Water. *J. Chem. Eng. Data* **1988**, *33*, 122–123.
115. Derks, P.W.J.; Hamborg, E.S.; Hogendoorn, J.A.; Niederer, J.P.M.; Versteeg, G.F. Densities, Viscosities, and Liquid Diffusivities in Aqueous Piperazine and Aqueous (Piperazine + N-Methyldiethanolamine) Solutions. *J. Chem. Eng. Data* **2008**, *53*, 1179–1185.
116. Hamborg, E.S.; Derks, P.W.J.; Kersten, S.R.A.; Niederer, J.P.M.; Versteeg, G.F. Diffusion Coefficients of N<sub>2</sub>O in Aqueous Piperazine Solutions Using the Taylor Dispersion Technique from (293 to 333) K and (0.3 to 1.4) Mol-dm<sup>-3</sup>. *J. Chem. Eng. Data* **2008**, *53*, 1462–1466.
117. Wise, D.L.; Houghton, G. The Diffusion Coefficients of Ten Slightly Soluble Gases in Water at 10–60°C. *Chem. Eng. Sci.* **1966**, *21*, 999–1010.
118. Plugatyr, A.; Svishchev, I.M. Molecular Diffusivity of Phenol in Sub- and Supercritical Water: Application of the Split-Flow Taylor Dispersion Technique. *Journal Phys. Chem. B* **2011**, *115*, 2555–2562.
119. Castillo, R.; Garza, C. Temperature Dependence of the Mutual Diffusion Coefficients in Aqueous Solutions of Alkali Metal Chlorides. *Int. J. Thermophys.* **1993**, *14*, 1145–1152.
120. Funazukuri, T.; Nishimoton; Wakao, N. Binary Diffusion Coefficients of Organic Compounds in Hexane, Dodecane, and Cyclohexane at 303.2–333.2 K and 16.0 MPa. *J. Chem. Eng. Data* **1994**, *39*, 911–915.
121. Chen, S.H.; Davis, H.T.; Evans, D.F. Tracer Diffusion in Polyatomic Liquids. II. *J. Chem. Phys.* **1981**, *75*, 2540–2544.
122. Sun, C.K.J.; Chen, S.H. Tracer Diffusion of Aromatic Hydrocarbons in Liquid Cyclohexane up to Its Critical Temperature. *AIChE J.* **1985**, *31*, 1510–1515.
123. Toriurmi, M.; Katooka, R.; Yui, K.; Funazukuri, T.; Kong, C.Y.; Kagei, S. Measurements of Binary Diffusion Coefficients for Metal Complexes in Organic Solvents by the Taylor Dispersion Method. *Fluid Phase Equilib.* **2010**, *297*, 62–66.
124. Chen, B.H.C.; Sun, C.K.J.; Chen, S.H. Hard Sphere Treatment of Binary Diffusion in Liquid at High Dilution up to the Critical Temperature. *J. Chem. Phys.* **1985**, *82*, 2052–2055.
125. Sun, C.K.J.; Chen, S.H. Tracer Diffusion of Aromatic Hydrocarbons in N-Hexane up to the Supercritical Region. *Chem. Eng. Sci.* **1985**, *40*, 2217–2224.
126. Chen, S.H.; Davis, H.T.; Evans, D.F. Tracer Diffusion in Polyatomic Liquids. III. *J. Chem. Phys.* **1982**, *77*, 2540–2544.
127. Chen, H.C.; Chen, S.H. Tracer Diffusion of Crown Ethers in N-Decane and n-Tetradecane: An Improved Correlation for Binary Systems Involving Normal Alkanes. *Ind. Eng. Chem. Fundam.* **1985**, *24*, 187–192.
128. Pollack, G.L.; Kennan, R.P.; Himm, J.F.; Stump, D.R. Diffusion of Xenon in Liquid Alkanes: Temperature Dependence Measurements with a New Method. Stokes–Einstein and Hard Sphere Theories. *J. Chem. Phys.* **1990**, *92*, 625–630.
129. Sun, C.K.J.; Chen, S.H. Diffusion of Benzene, Toluene, Naphthalene, and Phenanthrene in Supercritical Dense 2,3-Dimethylbutane. *AIChE J.* **1985**, *31*, 1904–1910.
130. Matthews, M.A.; Rodden, J.B.; Akgerman, A. High-Temperature Diffusion of Hydrogen, Carbon Monoxide, and Carbon Dioxide in Liquid n-Heptane, n-Dodecane, and n-Hexadecane. *J. Chem. Eng. Data* **1987**, *32*, 319–322.

131. Matthews, M.A.; Akgerman, A. Diffusion Coefficients for Binary Alkane Mixtures to 573 K and 3.5 MPa. *AIChE J.* **1987**, *33*, 881–885.
132. Rodden, J.B.; Erkey, C.; Akgerman, A. High-Temperature Diffusion, Viscosity, and Density Measurements in n-Eicosane. *J. Chem. Eng. Data* **1988**, *33*, 344–347.
133. Noel, J.M.; Erkey, C.; Bukur, D.B.; Akgerman, A. Infinite Dilution Mutual Diffusion Coefficients of 1-Octene and 1-Tetradecene in near-Critical Ethane and Propane. *J. Chem. Eng. Data* **1994**, *39*, 920–921.
134. Grushka, E.; Kikta, E.J. Diffusion in Liquids. II. Dependence of Diffusion Coefficients on Molecular Weight and on Temperature. *J. Am. Chem. Soc.* **1976**, *98*, 643–648.
135. Qian, R.Y.; Fan, Y.Q.; Shi, M.R.; Shi, J. Predictive Equation of Tracer Liquid Diffusion Coefficient from Viscosity. *Chinese J. Chem. Eng.* **1996**, *4*, 203–208.
136. Lo, H.Y. Diffusion Coefficients in Binary Liquid N-Alkane Systems. *J. Chem. Eng. Data* **1974**, *19*, 236–241.
137. Bidlack, D.L.; Anderson, D.K. Mutual Diffusion in Nonideal Nonassociating Liquid Systems. *J. Phys. Chem.* **1964**, *68*, 3790–3794.
138. Alizadeh, A.A.; Wakeham, W.A. Mutual Diffusion Coefficients for Binary Mixtures of Normal Alkanes. *Int. J. Thermophys.* **1982**, *3*, 307–323.
139. Padrel de Oliveira, C.M.; Fareleira, J.M.N.A.; Nieto de Castro, C.A. Mutual Diffusivity in Binary Mixtures of N-Heptane with n-Hexane Isomers. *Int. J. Thermophys.* **1989**, *10*, 973–982.
140. Li, S.F.Y.; Yue, L.S. Composition Dependence of Binary Diffusion Coefficients in Alkane Mixtures. *Int. J. Thermophys.* **1990**, *11*, 537–554.
141. Li, S.F.Y.; Wakeham, W.A. Mutual Diffusion Coefficients for Two N-Octane Isomers in n-Heptane. *Int. J. Thermophys.* **1989**, *10*, 995–1003.
142. Matthews, M.A.; Rodden, J.B.; Akgerman, A. High-Temperature Diffusion, Viscosity, and Density Measurements in n-Hexadecane. *J. Chem. Eng. Data* **1987**, *32*, 317–319.
143. Dymond, J.H.; Woolf, L.A. Tracer Diffusion of Organic Solutes in N-Hexane at Pressures up to 400 MPa. *J. Chem. Soc. Faraday Trans. 1* **1982**, *78*, 991–1000.
144. Safi, A.; Nicolas, C.; Neau, E.; Chevalier, J.L. Measurement and Correlation of Diffusion Coefficients of Aromatic Compounds at Infinite Dilution in Alkane and Cycloalkane Solvents. *J. Chem. Eng. Data* **2007**, *52*, 977–981.
145. Leffler, J.; Cullinan, H.T. Variation of Liquid Diffusion Coefficients with Composition. Dilute Ternary Systems. *Ind. Eng. Chem. Fundam.* **1970**, *9*, 88–93.
146. Harris, K.R.; Pua, C.K.N.; Dunlop, P.J. Mutual and Tracer Diffusion Coefficients and Frictional Coefficients for Systems Benzene-Chlorobenzene, Benzene-n-Hexane, and Benzene-n-Heptane at 25 °C. *J. Phys. Chem.* **1970**, *74*, 3518–3529.
147. Awan, M.A.; Dymond, J.H. Transport Properties of Nonelectrolyte Liquid Mixtures. X. Limiting Mutual Diffusion Coefficients of Fluorinated Benzenes in n-Hexane. *Int. J. Thermophys.* **1996**, *17*, 759–769.
148. Okamoto, M. Diffusion Coefficients Estimated by Dynamic Fluorescence Quenching at High Pressure: Pyrene, 9,10-Dimethylanthracene, and Oxygen in n-Hexane. *Int. J. Thermophys.* **2002**, *23*, 421–435.
149. Bidlack, D.L.; Kett, T.K.; Kelly, C.M.; Anderson, D.K. Diffusion in the Solvents Hexane and Carbon Tetrachloride. *J. Chem. Eng. Data* **1969**, *14*, 342–343.
150. Grushka, E.; Kikta, E.J. Extension of the Chromatographic Broadening Method of Measuring Diffusion Coefficients to Liquid Systems. I. Diffusion Coefficients of Some Alkylbenzenes in Chloroform. *J. Phys. Chem.* **1974**, *78*, 2297–2301.
151. Holmes, J.T.; Olander, D.R.; Wilke, C.R. Diffusion in Mixed Solvents. *AIChE J.* **1962**, *8*, 646–649.
152. Funazukuri, T.; Ishiwata, Y. Diffusion Coefficients of Linoleic Acid Methyl Ester, Vitamin K3 and Indole in Mixtures of Carbon Dioxide and n-Hexane at 313.2 K, and 16.0 MPa and 25.0 MPa. *Fluid Phase Equilib.* **1999**, *164*, 117–129.
153. Fan, Y.Q.; Qian, R.Y.; Shi, M.R.; Shi, J. Infinite Dilution Diffusion Coefficients of Several Aromatic Hydrocarbons in Octane and 2,2,4-Trimethylpentane. *J. Chem. Eng. Data* **1995**, *40*, 1053–1055.
154. Moore, J.W.; Wellek, R.M. Diffusion Coefficients of N-Heptane and n-Decane in n-Alkanes and n-Alcohols at Several Temperatures. *J. Chem. Eng. Data* **1974**, *19*, 136–140.
155. Debenedetti, P.G.; Reid, R.C. Diffusion and Mass Transfer in Supercritical Fluids. *AIChE J.* **1986**, *32*, 2034–2046.
156. Márquez, N.; Kreutzer, M.T.; Makkee, M.; Moulijn, J.A. Infinite Dilution Binary Diffusion Coefficients of Hydrotreating Compounds in Tetradecane in the Temperature Range from (310 to 475) K. *J. Chem. Eng. Data* **2008**, *53*, 439–443.
157. Funazukuri, T.; Kong, C.Y.; Kagei, S. Binary Diffusion Coefficients of Acetone in Carbon Dioxide at 308.2 and 313.2 K in the Pressure Range from 7.9 to 40 MPa. *Int. J. Thermophys.* **2000**, *21*, 651–669.

158. Sassiati, P.R.; Mourier, P.; Caude, M.H.; Rosset, R.H. Measurement of Diffusion Coefficients in Supercritical Carbon Dioxide and Correlation with the Equation of Wilke and Chang. *Anal. Chem.* **1987**, *59*, 1164–1170.
159. Funazukuri, T.; Kong, C.Y.; Kagei, S. Infinite-Dilution Binary Diffusion Coefficients of 2-Propanone, 2-Butanone, 2-Pentanone, and 3-Pentanone in CO<sub>2</sub>. *Int. J. Thermophys.* **2000**, *21*, 1279–1290.
160. Kong, C.Y.; Funazukuri, T.; Kagei, S. Chromatographic Impulse Response Technique with Curve Fitting to Measure Binary Diffusion Coefficients and Retention Factors Using Polymer-Coated Capillary Columns. *J. Chromatogr. A* **2004**, *1035*, 177–193.
161. Nishiumi, H.; Fujita, M.; Agou, K. Diffusion of Acetone in Supercritical Carbon Dioxide. *Fluid Phase Equilib.* **1996**, *117*, 356–363.
162. Shenai, V.M.; Hamilton, B.L.; Matthews, M.A. Diffusion in Liquid and Supercritical Fluid Mixtures. In *Supercritical Fluid Engineering Science - Fundamentals and Applications*; Kiran, E., Brennecke, J.F., Eds.; 1992; pp. 92–103.
163. Dahmen, N.; Kordikowski, A.; Schneider, G.M. Determination of Binary Diffusion Coefficients of Organic Compounds in Supercritical Carbon Dioxide by Supercritical Fluid Chromatography. *J. Chromatogr. A* **1990**, *505*, 169–178.
164. Suárez-Iglesias, O.; Medina, I.; Pizarro, C.; Bueno, J.L. Diffusion Coefficients of 2-Fluoroanisole, 2-Bromoanisole, Allylbenzene and 1,3-Divinylbenzene at Infinite Dilution in Supercritical Carbon Dioxide. *Fluid Phase Equilib.* **2007**, *260*, 279–286.
165. González, L.M.; Suárez-Iglesias, O.; Bueno, J.L.; Pizarro, C.; Medina, I. Limiting Binary Diffusivities of Aniline, Styrene, and Mesitylene in Supercritical Carbon Dioxide. *J. Chem. Eng. Data* **2007**, *52*, 1286–1290.
166. González, L.M.; Bueno, J.L.; Medina, I. Determination of Binary Diffusion Coefficients of Anisole, 2,4-Dimethylphenol, and Nitrobenzene in Supercritical Carbon Dioxide. *Ind. Eng. Chem. Res.* **2001**, *40*, 3711–3716.
167. Abaroudi, K. *Limpieza de Matrices Sólidas Porosas de Interés Medioambiental Con Fluidos Supercríticos*, Universidad Politécnica de Cataluña, 2001.
168. Funazukuri, T.; Kong, C.Y.; Kikuchi, T.; Kagei, S. Measurements of Binary Diffusion Coefficient and Partition Ratio at Infinite Dilution for Linoleic Acid and Arachidonic Acid in Supercritical Carbon Dioxide. *J. Chem. Eng. Data* **2003**, *48*, 684–688.
169. Han, Y.S.; Yang, Y.W.; Wu, P.D. Binary Diffusion Coefficients of Arachidonic Acid Ethyl Ester, Cis-5,8,11,14,17-Eicosapentaenoic Acid Ethyl Ester, and Cis-4,7,10,13,16,19-Docosahexanoic Acid Ethyl Ester in Supercritical Carbon Dioxide. *J. Chem. Eng. Data* **2007**, *52*, 555–559.
170. Liong, K.K.; Wells, P.A.; Foster, N.R. Diffusion Coefficients of Long-Chain Esters in Supercritical Carbon Dioxide. *Ind. Eng. Chem. Res.* **1991**, *30*, 1329–1335.
171. Filho, C.A.; Silva, C.M.; Quadri, M.B.; Macedo, E.A. Infinite Dilution Diffusion Coefficients of Linalool and Benzene in Supercritical Carbon Dioxide. *J. Chem. Eng. Data* **2002**, *47*, 1351–1354.
172. Swaid, I.; Schneider, G.M. Determination of Binary Diffusion Coefficients of Benzene and Some Alkylbenzenes in Supercritical CO<sub>2</sub> between 308 and 328 K in the Pressure Range 80 to 160 Bar with Supercritical Fluid Chromatography (SFC). *Ber. Bunsenges. Phys. Chem.. Chem.* **1979**, *83*, 969–974.
173. Suárez, J.J.; Bueno, J.L.; Medina, I. Determination of Binary Diffusion Coefficients of Benzene and Derivatives in Supercritical Carbon Dioxide. *Chem. Eng. Sci.* **1993**, *48*, 2419–2427.
174. Funazukuri, T.; Nishimoto, N. Tracer Diffusion Coefficients of Benzene in Dense CO<sub>2</sub> at 313.2 K and 8.5–30 MPa. *Fluid Phase Equilib.* **1996**, *125*, 235–243.
175. Funazukuri, T.; Kong, C.Y.; Kagei, S. Infinite Dilution Binary Diffusion Coefficients of Benzene in Carbon Dioxide by the Taylor Dispersion Technique at Temperatures from 308.15 to 328.15 K and Pressures from 6 to 30 MPa. *Int. J. Thermophys.* **2001**, *22*, 1643–1660.
176. Sengers, J.M.H.L.; Deiters, U.K.; Klask, U.; Swidersky, P.; Schneider, G.M. Application of the Taylor Dispersion Method in Supercritical Fluids. *Int. J. Thermophys.* **1993**, *14*, 893–922.
177. Ago, K.; Nishiumi, H. Mutual Diffusion Coefficients of Benzene in Supercritical Carbon Dioxide. *J. Chem. Eng. Japan* **1999**, *32*, 563–568.
178. Bueno, J.L.; Suárez, J.J.; Dizy, J.; Medina, I. Infinite Dilution Diffusion Coefficients: Benzene Derivatives as Solutes in Supercritical Carbon Dioxide. *J. Chem. Eng. Data* **1993**, *38*, 344–349.
179. Kong, C.Y.; Funazukuri, T.; Kagei, S. Binary Diffusion Coefficients and Retention Factors for Polar Compounds in Supercritical Carbon Dioxide by Chromatographic Impulse Response Method. *J. Supercrit. Fluids* **2006**, *37*, 359–366.
180. Catchpole, O.J.; King, M.B. Measurement and Correlation of Binary Diffusion Coefficients in near Critical Fluids. *Ind. Eng. Chem. Res.* **1994**, *33*, 1828–1837.
181. Fu, H.; Coelho, L.A.F.; Matthews, M.A. Diffusion Coefficients of Model Contaminants in Dense CO<sub>2</sub>. *J. Supercrit. Fluids* **2000**, *18*, 141–155.

182. Suárez-Iglesias, O.; Medina, I.; Pizarro, C.; Bueno, J.L. Limiting Diffusion Coefficients of Ethyl Benzoate, Benzylacetone, and Eugenol in Carbon Dioxide at Supercritical Conditions. *J. Chem. Eng. Data* **2008**, *53*, 779–784.
183. González, L.M.; Suárez-Iglesias, O.; Bueno, J.L.; Pizarro, C.; Medina, I. Application of the Corresponding States Principle to the Diffusion in CO<sub>2</sub>. *AIChE J.* **2007**, *53*, 3054–3061.
184. Suárez, J.J.; Medina, I.; Bueno, J.L. Diffusion Coefficients in Supercritical Fluids: Available Data and Graphical Correlations. *Fluid Phase Equilib.* **1998**, *153*, 167–212.
185. Funazukuri, T. Measurements of Binary Diffusion Coefficients of 20 Organic Compounds in CO<sub>2</sub> at 313.2 K and 16.0 MPa. *J. Chem. Eng. Japan* **1996**, *29*, 191–192.
186. Pizarro, C.; Suárez-Iglesias, O.; Medina, I.; Bueno, J.L. Diffusion Coefficients of N-Butylbenzene, n-Pentylbenzene, 1-Phenylhexane, 1-Phenyloctane, and 1-Phenyldodecane in Supercritical Carbon Dioxide. *Ind. Eng. Chem. Res.* **2008**, *47*, 6783–6789.
187. González, L.M.; Bueno, J.L.; Medina, I. Measurement of Diffusion Coefficients for 2-Nitroanisole, 1,2-Dichlorobenzene and Tert-Butylbenzene in Carbon Dioxide Containing Modifiers. *J. Supercrit. Fluids* **2002**, *24*, 219–229.
188. Liong, K.K.; Wells, P.A.; Foster, N.R. Diffusion of Fatty Acid Esters in Supercritical Carbon Dioxide. *Ind. Eng. Chem. Res.* **1992**, *31*, 390–399.
189. Wells, P.A. Diffusion in Supercritical Fluids, The University of New South Wales, Kensington, Australia, 1991.
190. Lai, C.-C.; Tan, C.-S. Measurement of Molecular Diffusion Coefficient in Supercritical Carbon Dioxide Using a Coated Capillary Column. *Ind. Eng. Chem. Res.* **1995**, *34*, 674–680.
191. Knaff, G.; Schlünder, E.U. Diffusion Coefficients of Naphthalene and Caffeine in Supercritical Carbon Dioxide. *Chem. Eng. Process.* **1987**, *21*, 101–105.
192. Lauer, H.H.; McManigill, D.; Board, R.D. Mobile-Phase Transport Properties of Liquefied Gases in near Critical and Supercritical Fluid Chromatography. *Anal. Chem.* **1983**, *55*, 1370–1375.
193. Funazukuri, T.; Kong, C.Y.; Kagei, S. Binary Diffusion Coefficients, Partition Ratios and Partial Molar Volumes at Infinite Dilution for  $\beta$ -Carotene and  $\alpha$ -Tocopherol in Supercritical Carbon Dioxide. *J. Supercrit. Fluids* **2003**, *27*, 85–96.
194. Funazukuri, T.; Kong, C.Y.; Murooka, N.; Kagei, S. Measurements of Binary Diffusion Coefficients and Partition Ratios for Acetone, Phenol,  $\alpha$ -Tocopherol, and  $\beta$ -Carotene in Supercritical Carbon Dioxide with a Poly(Ethylene Glycol)-Coated Capillary Column. *Ind. Eng. Chem. Res.* **2000**, *39*, 4462–4469.
195. Funazukuri, T.; Kong, C.Y.; Kagei, S. Measurements of Binary Diffusion Coefficients for Some Low Volatile Compounds in Supercritical Carbon Dioxide by Input–Output Response Technique with Two Diffusion Columns Connected in Series. *Fluid Phase Equilib.* **2002**, *194*, 1169–1178.
196. Dong, X.; Su, B.; Xing, H.; Bao, Z.; Yang, Y.; Ren, Q. Cosolvent Effects on the Diffusions of 1,3-Dichlorobenzene, L-Carvone, Geraniol and 3-Fluorophenol in Supercritical Carbon Dioxide. **2011**, *58*, 216–225.
197. Dong, X.; Su, B.; Xing, H.; Yang, Y.; Ren, Q. Diffusion Coefficients of L-Menthone and L-Carvone in Mixtures of Carbon Dioxide and Ethanol. *J. Supercrit. Fluids* **2010**, *55*, 86–95.
198. Cordeiro, J.; Magalhães, A.L.; Valente, A.A.; Silva, C.M. Experimental and Theoretical Analysis of the Diffusion Behavior of Chromium(III) Acetylacetonate in Supercritical CO<sub>2</sub>. *J. Supercrit. Fluids* **2016**, *118*, 153–162.
199. Filho, C.A.; Silva, C.M.; Quadri, M.B.; Macedo, E.A. Tracer Diffusion Coefficients of Citral and D-Limonene in Supercritical Carbon Dioxide. *Fluid Phase Equilib.* **2003**, *204*, 65–73.
200. Kong, C.Y.; Gu, Y.Y.; Nakamura, M.; Funazukuri, T.; Kagei, S. Diffusion Coefficients of Metal Acetylacetonates in Supercritical Carbon Dioxide. *Fluid Phase Equilib.* **2010**, *297*, 162–167.
201. Yang, Y.N.; Matthews, M.A. Diffusion of Chelating Agents in Supercritical CO<sub>2</sub> and a Predictive Approach for Diffusion Coefficients. *J. Chem. Eng. Data* **2001**, *46*, 588–595.
202. Kong, C.Y.; Takahashi, N.; Funazukuri, T.; Kagei, S. Measurements of Binary Diffusion Coefficients and Retention Factors for Dibenzo-24-Crown-8 and 15-Crown-5 in Supercritical Carbon Dioxide by Chromatographic Impulse Response Technique. *Fluid Phase Equilib.* **2007**, *257*, 223–227.
203. Dahmen, N.; Dulberg, A.; Schneider, G.M.M. Determination of Binary Diffusion Coefficients in Supercritical Carbon Dioxide with Supercritical Fluid Chromatography (SFC). *Ber. Bunsenges. Phys. Chem.* **1990**, *94*, 384–386.
204. Umezawa, S.; Nagashima, A. Measurement of the Diffusion Coefficients of Acetone, Benzene, and Alkane in Supercritical CO<sub>2</sub> by the Taylor Dispersion Method. *J. Supercrit. Fluids* **1992**, *5*, 242–250.
205. Silva, C.M.; Macedo, E.A. Diffusion Coefficients of Ethers in Supercritical Carbon Dioxide. *Ind. Eng. Chem. Res.* **1998**, *37*, 1490–1498.

206. Pizarro, C.; Suárez-Iglesias, O.; Medina, I.; Bueno, J.L. Using Supercritical Fluid Chromatography to Determine Diffusion Coefficients of 1,2-Diethylbenzene, 1,4-Diethylbenzene, 5-Tert-Butyl-m-Xylene and Phenylacetylene in Supercritical Carbon Dioxide. *J. Chromatogr. A* **2007**, *1167*, 202–209.
207. Pizarro, C.; Suárez-Iglesias, O.; Medina, I.; Bueno, J.L. Binary Diffusion Coefficients for 2,3-Dimethylaniline, 2,6-Dimethylaniline, 2-Methylanisole, 4-Methylanisole and 3-Nitrotoluene in Supercritical Carbon Dioxide. *J. Supercrit. Fluids* **2009**, *48*, 1–8.
208. Kong, C.Y.; Nakamura, M.; Sone, K.; Funazukuri, T.; Kagei, S. Measurements of Binary Diffusion Coefficients for Ferrocene and 1,1'-Dimethylferrocene in Supercritical Carbon Dioxide. *J. Chem. Eng. Data* **2010**, *55*, 3095–3100.
209. Higashi, H.; Iwai, Y.; Nakamura, Y.; Yamamoto, S.; Arai, Y. Correlation of Diffusion Coefficients for Naphthalene and Dimethylnaphthalene Isomers in Supercritical Carbon Dioxide. *Fluid Phase Equilib.* **1999**, *166*, 101–110.
210. Higashi, H.; Iwai, Y.; Takahashi, Y.; Uchida, H.; Arai, Y. Diffusion Coefficients of Naphthalene and Dimethylnaphthalene in Supercritical Carbon Dioxide. *Fluid Phase Equilib.* **1998**, *144*, 269–278.
211. Funazukuri, T.; Kong, C.Y.; Kagei, S. Effects of Molecular Weight and Degree of Unsaturation on Binary Diffusion Coefficients for Lipids in Supercritical Carbon Dioxide. *Fluid Phase Equilib.* **2004**, *219*, 67–73.
212. Funazukuri, T.; Kong, C.Y.; Kagei, S. Binary Diffusion Coefficient, Partition Ratio, and Partial Molar Volume for Docosahexaenoic Acid, Eicosapentaenoic Acid and  $\alpha$ -Linolenic Acid at Infinite Dilution in Supercritical Carbon Dioxide. *Fluid Phase Equilib.* **2003**, *206*, 163–178.
213. Pizarro, C.; Suárez-Iglesias, O.; Medina, I.; Bueno, J.L. Binary Diffusion Coefficients of 2-Ethyltoluene, 3-Ethyltoluene, and 4-Ethyltoluene in Supercritical Carbon Dioxide. *J. Chem. Eng. Data* **2009**, *54*, 1467–1471.
214. Kong, C.Y.; Sone, K.; Sako, T.; Funazukuri, T.; Kagei, S. Solubility Determination of Organometallic Complexes in Supercritical Carbon Dioxide by Chromatographic Impulse Response Method. *Fluid Phase Equilib.* **2011**, *302*, 347–353.
215. Akgerman, A.; Erkey, C.; Orejuela, M. Limiting Diffusion Coefficients of Heavy Molecular Weight Organic Contaminants in Supercritical Carbon Dioxide. *Ind. Eng. Chem. Res.* **1996**, *35*, 911–917.
216. Lin, R.; Tavlarides, L.L. Diffusion Coefficients of Diesel Fuel and Surrogate Compounds in Supercritical Carbon Dioxide. *J. Supercrit. Fluids* **2010**, *52*, 47–55.
217. Funazukuri, T.; Hachisu, S.; Wakao, N. Measurements of Binary Diffusion Coefficients of C16-C24 Unsaturated Fatty Acid Methyl Esters in Supercritical Carbon Dioxide. *Ind. Eng. Chem. Res.* **1991**, *30*, 1323–1329.
218. Kong, C.Y.; Withanage, N.R.W.; Funazukuri, T.; Kagei, S. Binary Diffusion Coefficients and Retention Factors for  $\gamma$ -Linolenic Acid and Its Methyl and Ethyl Esters in Supercritical Carbon Dioxide. *J. Supercrit. Fluids* **2006**, *37*, 63–71.
219. Kong, C.Y.; Mori, M.; Funazukuri, T.; Kagei, S. Measurements of Binary Diffusion Coefficients, Retention Factors and Partial Molar Volumes for Myristoleic Acid and Its Methyl Ester in Supercritical Carbon Dioxide. *Anal. Sci.* **2006**, *22*, 1431–1436.
220. Funazukuri, T.; Ishiwata, Y.; Wakao, N. Predictive Correlation for Binary Diffusion Coefficients in Dense Carbon Dioxide. *AIChE J.* **1992**, *38*, 1761–1768.
221. Lamb, D.M.; Adamy, S.T.; Woo, K.W.; Jonas, J. Transport and Relaxation of Naphthalene in Supercritical Fluids. *J. Phys. Chem.* **1989**, *93*, 5002–5005.
222. Funazukuri, T.; Hachisu, S.; Wakao, N. Measurement of Diffusion Coefficients of C18 Unsaturated Fatty Acid Methyl Esters, Naphthalene, and Benzene in Supercritical Carbon Dioxide by a Tracer Response Technique. *Anal. Chem.* **1989**, *61*, 118–122.
223. Wells, T.; Foster, N.R.; Chaplin, R.P. Diffusion of Phenylacetic Acid and Vanillin in Supercritical Carbon Dioxide. *Ind. Eng. Chem. Res.* **1992**, *31*, 927–934.
224. Pizarro, C.; Suárez-Iglesias, O.; Medina, I.; Bueno, J.L. Molecular Diffusion Coefficients of Phenylmethanol, 1-Phenylethanol, 2-Phenylethanol, 2-Phenyl-1-Propanol, and 3-Phenyl-1-Propanol in Supercritical Carbon Dioxide. *J. Supercrit. Fluids* **2008**, *43*, 469–476.
225. Silva, C.M.; Filho, C.A.; Quadri, M.B.; Macedo, E.A. Binary Diffusion Coefficients of  $\alpha$ -Pinene and  $\beta$ -Pinene in Supercritical Carbon Dioxide. *J. Supercrit. Fluids* **2004**, *32*, 167–175.
226. Vaz, R. V.; Magalhães, A.L.; Valente, A.A.; Silva, C.M. Measurement and Modeling of Tracer Diffusivities of  $\alpha$ -Pinene in Supercritical CO<sub>2</sub>, and Analysis of Their Hydrodynamic and Free-Volume Behaviors. *J. Supercrit. Fluids* **2016**, *107*, 690–698.
227. Suárez, J.J.; Bueno, J.L.; Medina, I.; Dizy, J. Applications of supercritical chromatography - Determination of molecular diffusivity. *Afinidad* **1992**, *49*, 101–113.

- 228. Kong, C.Y.; Withanage, N.R.W.; Funazukuri, T.; Kagei, S. Binary Diffusion Coefficients and Retention Factors for Long-Chain Triglycerides in Supercritical Carbon Dioxide by the Chromatographic Impulse Response Method. *J. Chem. Eng. Data* **2005**, *50*, 1635–1640.
- 229. Funazukuri, T.; Kong, C.Y.; Kagei, S. Infinite-Dilution Binary Diffusion Coefficient, Partition Ratio, and Partial Molar Volume for Ubiquinone CoQ10 in Supercritical Carbon Dioxide. *Ind. Eng. Chem. Res.* **2002**, *41*, 2812–2818.
- 230. Xu, B.; Nagashima, K.; DeSimone, J.M.; Johnson Jr., C.S. Diffusion of Water in Liquid and Supercritical Carbon Dioxide: An NMR Study. *J. Phys. Chem. A* **2003**, *107*, 1–3.
